# Supplementary material
Source: publisher site journal article supplement (https://www.spandidos-publications.com/2946/downloadSupplementary)
Supplement: Supplementary file 1 [file downloadSupplementary]

## Sheet: Table S1 Different genes
Table SII. Different genes in silica-treated rat lungs
Gene	gene_type	Position	Strand	C1	C2	C3	S1	S2	S3	logFC	logCPM	PValue	FDR	Description	Website
LOC100912290	NA	chr4:170092457-170117607	-	0	0	0	272	0	0	9.36598	0.902665	6.11618e-05	0.0015339	histone H4-like	http://www.ncbi.nlm.nih.gov/gene/?term=100912290
Lpo	protein_coding	chr10:75100385-75120320	-	11	8	8	2545	327	1192	7.18911	4.78576	3.71806e-35	1.09565e-31	lactoperoxidase	http://www.ncbi.nlm.nih.gov/gene/?term=287610
Defb5	protein_coding	chr16:75589530-75599524	-	5	6	7	925	217	437	6.42917	3.45883	1.7036e-39	7.53034e-36	defensin beta 5	http://www.ncbi.nlm.nih.gov/gene/?term=641624
Itln1	protein_coding	chr13:89919667-89929774	+	3	18	23	88	2350	42	6.11338	4.38522	1.35596e-06	6.00871e-05	intelectin 1	http://www.ncbi.nlm.nih.gov/gene/?term=498284
Spp1	protein_coding	chr14:6673686-6679942	-	165	119	221	12802	6620	10579	5.94893	7.74772	8.5183e-128	3.01224e-123	secreted phosphoprotein 1	http://www.ncbi.nlm.nih.gov/gene/?term=25353
LOC691603	NA	chr15:34691247-34694270	-	0	0	0	16	1	6	5.91078	-2.04167	0.000675283	0.0114146	similar to mast cell protease 9	http://www.ncbi.nlm.nih.gov/gene/?term=691603
Mmp12	protein_coding	chr8:5606592-5616494	+	35	42	88	5055	1155	2571	5.74946	5.93287	7.17119e-40	4.22646e-36	matrix metallopeptidase 12	http://www.ncbi.nlm.nih.gov/gene/?term=117033
LOC103691626	lncRNA	chr2:192342764-192344236	-	0	0	0	2	2	15	5.71996	-2.20373	0.0025234	0.0332833	uncharacterized LOC103691626	http://www.ncbi.nlm.nih.gov/gene/?term=103691626
LOC102551936	protein_coding	chr2:193083594-193085303	-	0	0	0	5	5	5	5.40508	-2.40178	0.00110366	0.0170827	late cornified envelope protein 1C-like	http://www.ncbi.nlm.nih.gov/gene/?term=102551936
Mt3	protein_coding	chr19:11324708-11326112	-	0	0	0	4	8	2	5.35806	-2.45106	0.00346365	0.042751	metallothionein 3	http://www.ncbi.nlm.nih.gov/gene/?term=117038
LOC103691771	lncRNA	chr3:14256616-14258114	+	2	2	1	131	31	52	5.31873	0.668902	5.29992e-15	1.34832e-12	uncharacterized LOC103691771	http://www.ncbi.nlm.nih.gov/gene/?term=103691771
Ccl12	protein_coding	chr10:69476866-69478416	+	4	1	3	201	51	74	5.29128	1.24968	1.39196e-17	5.40907e-15	chemokine (C-C motif) ligand 12	http://www.ncbi.nlm.nih.gov/gene/?term=287562
Mmp7	protein_coding	chr8:5893253-5900965	+	1	2	3	100	62	65	5.21996	0.787822	4.28525e-25	5.6124e-22	matrix metallopeptidase 7	http://www.ncbi.nlm.nih.gov/gene/?term=25335
Ccl2	protein_coding	chr10:69412065-69413863	+	34	24	45	2378	402	920	5.15479	4.68664	1.36434e-27	2.29741e-24	C-C motif chemokine ligand 2	http://www.ncbi.nlm.nih.gov/gene/?term=24770
Ccl7	protein_coding	chr10:69423083-69424933	+	19	7	61	2035	291	641	5.09704	4.3621	4.50723e-14	9.89967e-12	C-C motif chemokine ligand 7	http://www.ncbi.nlm.nih.gov/gene/?term=287561
Cxcl6	protein_coding	chr14:18860201-18920839	-	29	14	27	1521	234	569	5.03025	4.01915	1.52143e-22	1.41581e-19	C-X-C motif chemokine ligand 6	http://www.ncbi.nlm.nih.gov/gene/?term=60665
Slc26a4	protein_coding	chr6:50809103-50848443	-	25	29	62	1979	358	1087	4.8895	4.59116	2.8606e-25	3.89063e-22	solute carrier family 26 member 4	http://www.ncbi.nlm.nih.gov/gene/?term=29440
Saal1	protein_coding	chr1:102738691-102743572	-	3	4	5	187	40	131	4.86533	1.39273	1.06434e-17	4.27695e-15	serum amyloid A-like 1	http://www.ncbi.nlm.nih.gov/gene/?term=687992
Psca	protein_coding	chr7:116090189-116091955	+	1	1	1	25	40	19	4.76417	-0.499361	5.25386e-10	5.04856e-08	prostate stem cell antigen	http://www.ncbi.nlm.nih.gov/gene/?term=680210
Grin3a	protein_coding	chr5:64928620-65073012	-	3	1	2	59	60	30	4.64712	0.251964	5.39653e-14	1.15656e-11	glutamate ionotropic receptor NMDA type subunit 3A	http://www.ncbi.nlm.nih.gov/gene/?term=191573
Orm1	protein_coding	chr5:79179668-79182820	+	7	8	11	318	50	273	4.60752	2.21444	3.48763e-16	1.12118e-13	orosomucoid 1	http://www.ncbi.nlm.nih.gov/gene/?term=24614
Lcn2	protein_coding	chr3:11414189-11417534	-	596	755	861	29629	6867	17036	4.60414	8.57264	1.29866e-39	6.56044e-36	lipocalin 2	http://www.ncbi.nlm.nih.gov/gene/?term=170496
Fgb	protein_coding	chr2:182027100-182037123	-	3	0	0	17	37	16	4.51613	-0.716152	2.1989e-07	1.1926e-05	fibrinogen beta chain	http://www.ncbi.nlm.nih.gov/gene/?term=24366
Marco	protein_coding	chr16:85115199-85147683	-	4	1	0	38	6	76	4.4889	-0.0709667	1.30253e-06	5.79373e-05	macrophage receptor with collagenous structure	http://www.ncbi.nlm.nih.gov/gene/?term=367391
Retnla	protein_coding	chr11:54543729-54545480	-	224	213	305	9138	1400	4694	4.35134	6.75363	5.12554e-24	6.04164e-21	resistin like alpha	http://www.ncbi.nlm.nih.gov/gene/?term=81712
Chia	protein_coding	chr2:208750348-208797388	+	2178	1860	1814	58138	25083	32620	4.33921	9.73098	3.89625e-74	6.88896e-70	chitinase, acidic	http://www.ncbi.nlm.nih.gov/gene/?term=113901
Gp2	protein_coding	chr1:189166735-189182306	-	7	3	10	4	321	0	4.31532	1.49528	0.00354267	0.0434232	glycoprotein 2	http://www.ncbi.nlm.nih.gov/gene/?term=171459
Gpr84	protein_coding	chr7:144934606-144936865	-	2	0	1	30	13	20	4.27514	-0.876791	1.13531e-08	8.31197e-07	G protein-coupled receptor 84	http://www.ncbi.nlm.nih.gov/gene/?term=688730
Irg1	protein_coding	chr15:93612968-93622185	+	14	5	18	286	218	149	4.21402	2.32397	3.69018e-26	5.43717e-23	immunoresponsive gene 1	http://www.ncbi.nlm.nih.gov/gene/?term=306127
LOC103691483	lncRNA	chr2:60735521-60743685	+	1	3	0	51	17	12	4.21124	-0.584215	4.18493e-07	2.12016e-05	uncharacterized LOC103691483	http://www.ncbi.nlm.nih.gov/gene/?term=103691483
Aldh1l2	protein_coding	chr7:26375866-26425838	+	18	7	6	110	286	118	4.19121	2.05755	1.24759e-13	2.52099e-11	aldehyde dehydrogenase 1 family, member L2	http://www.ncbi.nlm.nih.gov/gene/?term=299699
Atp6v0d2	protein_coding	chr5:33843591-33892446	-	14	3	7	203	79	147	4.17106	1.69472	2.77495e-20	1.75228e-17	ATPase H+ transporting V0 subunit D2	http://www.ncbi.nlm.nih.gov/gene/?term=297932
Cd177	protein_coding	chr1:82964683-82987293	-	19	19	30	581	303	297	4.16711	3.14773	6.73739e-38	2.6472e-34	CD177 molecule	http://www.ncbi.nlm.nih.gov/gene/?term=499099
LOC100910979	protein_coding	chr18:55456226-55464624	+	2	0	2	3	57	4	4.14913	-0.77169	0.00129108	0.0193865	interferon-inducible GTPase 1-like	http://www.ncbi.nlm.nih.gov/gene/?term=100910979
LOC102555378	lncRNA	chr6:50786993-50808880	+	13	0	6	200	31	111	4.13268	1.34874	4.5682e-09	3.53481e-07	uncharacterized LOC102555378	http://www.ncbi.nlm.nih.gov/gene/?term=102555378
Muc20	protein_coding	chr11:71222605-71236223	+	4	2	24	263	45	133	3.88983	1.7176	1.90154e-08	1.29312e-06	mucin 20, cell surface associated	http://www.ncbi.nlm.nih.gov/gene/?term=303886
Slc1a6	protein_coding	chr7:13730101-13758274	-	3	1	0	41	13	7	3.81723	-0.902507	2.99651e-05	0.000847023	solute carrier family 1 member 6	http://www.ncbi.nlm.nih.gov/gene/?term=84012
Fabp4	protein_coding	chr2:93792666-93797267	+	87	33	105	1544	439	1000	3.75396	4.46875	1.82948e-21	1.40639e-18	fatty acid binding protein 4	http://www.ncbi.nlm.nih.gov/gene/?term=79451
LOC100911545	protein_coding	chr4:154422862-154473042	+	1	0	1	13	10	7	3.74927	-1.69653	5.42207e-05	0.00139039	alpha-2-macroglobulin-like	http://www.ncbi.nlm.nih.gov/gene/?term=100911545
Ccl22	protein_coding	chr19:10674189-10681145	-	19	19	11	275	167	184	3.71978	2.27887	3.56342e-29	7.87561e-26	C-C motif chemokine ligand 22	http://www.ncbi.nlm.nih.gov/gene/?term=117551
LOC102548124	lncRNA	chr6:126330701-126342359	+	4	0	1	44	12	11	3.65556	-0.779861	1.71455e-05	0.000522671	uncharacterized LOC102548124	http://www.ncbi.nlm.nih.gov/gene/?term=102548124
LOC103693493	lncRNA	chr10:109705688-109708728	-	1	0	0	5	5	6	3.64363	-2.29856	0.00374801	0.0453894	uncharacterized LOC103693493	http://www.ncbi.nlm.nih.gov/gene/?term=103693493
Itih1	protein_coding	chr16:7012376-7026542	-	10	2	0	87	10	59	3.62633	0.3063	1.39876e-05	0.000444809	inter-alpha trypsin inhibitor, heavy chain 1	http://www.ncbi.nlm.nih.gov/gene/?term=306251
Gpnmb	protein_coding	chr4:78694447-78715685	+	3272	2125	3828	48588	22817	36361	3.59671	9.67762	2.42237e-52	2.85533e-48	glycoprotein nmb	http://www.ncbi.nlm.nih.gov/gene/?term=113955
LOC102552631	NA	chr14:60337447-60342417	+	32	30	21	677	107	232	3.58047	2.90935	9.46044e-13	1.64798e-10	uncharacterized LOC102552631	http://www.ncbi.nlm.nih.gov/gene/?term=102552631
Cd5l	protein_coding	chr2:186685104-186696117	+	12	5	25	187	97	190	3.55078	1.88742	2.92982e-17	1.07921e-14	Cd5 molecule-like	http://www.ncbi.nlm.nih.gov/gene/?term=310693
Kng1	protein_coding	chr11:81509185-81516759	+	86	66	118	1821	296	1003	3.52772	4.52596	1.87234e-16	6.2462e-14	kininogen 1	http://www.ncbi.nlm.nih.gov/gene/?term=24903
Cpb2	protein_coding	chr15:57290849-57339762	+	6	11	12	172	69	88	3.52582	1.36398	1.89744e-16	6.27077e-14	carboxypeptidase B2	http://www.ncbi.nlm.nih.gov/gene/?term=113936
Thbs2	protein_coding	chr1:56653929-56683571	-	97	72	95	718	1234	788	3.5092	4.48069	2.88401e-30	7.28461e-27	thrombospondin 2	http://www.ncbi.nlm.nih.gov/gene/?term=292406
RGD1561715	misc_RNA	chr4:156728192-156730309	-	47	19	5	450	237	106	3.49998	2.62381	1.74667e-08	1.21347e-06	similar to complement component 1, s subcomponent	http://www.ncbi.nlm.nih.gov/gene/?term=500313
Chrdl2	protein_coding	chr1:165008997-165036431	+	2	2	0	13	17	14	3.43247	-1.23876	6.39623e-06	0.000227092	chordin-like 2	http://www.ncbi.nlm.nih.gov/gene/?term=308854
Il12b	protein_coding	chr10:30034453-30048120	+	12	2	3	66	63	47	3.42744	0.545128	6.43227e-11	7.43326e-09	interleukin 12B	http://www.ncbi.nlm.nih.gov/gene/?term=64546
Rhbdl2	protein_coding	chr5:141462300-141512067	+	16	13	15	230	81	143	3.38482	1.8225	2.24736e-18	1.05962e-15	rhomboid like 2	http://www.ncbi.nlm.nih.gov/gene/?term=298512
Bpifb1	protein_coding	chr3:149668195-149702399	+	280	252	1421	7637	7593	3132	3.38188	7.20442	6.64195e-10	6.26327e-08	BPI fold containing family B, member 1	http://www.ncbi.nlm.nih.gov/gene/?term=499926
Cpne5	protein_coding	chr20:6419033-6500523	-	13	5	10	161	35	93	3.35745	1.17685	1.33786e-10	1.46469e-08	copine 5	http://www.ncbi.nlm.nih.gov/gene/?term=309650
Slc47a1	protein_coding	chr10:47632352-47666876	-	11	13	12	153	56	143	3.30919	1.47599	1.47275e-15	4.13327e-13	solute carrier family 47 member 1	http://www.ncbi.nlm.nih.gov/gene/?term=360539
Ptprv	protein_coding	chr13:51935239-51955575	-	10	4	5	35	67	71	3.27678	0.553683	4.85404e-10	4.71562e-08	protein tyrosine phosphatase, receptor type, V	http://www.ncbi.nlm.nih.gov/gene/?term=64576
LOC102549714	lncRNA	chr7:60282544-60283798	+	82	75	129	1292	936	379	3.27541	4.37467	8.55024e-19	4.19935e-16	uncharacterized LOC102549714	http://www.ncbi.nlm.nih.gov/gene/?term=102549714
Trem2	protein_coding	chr9:14611551-14618081	-	53	35	124	932	427	576	3.25287	3.91287	3.17094e-19	1.68585e-16	triggering receptor expressed on myeloid cells 2	http://www.ncbi.nlm.nih.gov/gene/?term=301227
Tspan10	protein_coding	chr10:109614818-109619517	+	10	2	5	46	46	63	3.24416	0.384418	2.1665e-11	2.78589e-09	tetraspanin 10	http://www.ncbi.nlm.nih.gov/gene/?term=688308
Cfi	protein_coding	chr2:235264149-235305779	+	194	139	217	2796	986	1312	3.23923	5.2891	1.60764e-29	3.78995e-26	complement factor I	http://www.ncbi.nlm.nih.gov/gene/?term=79126
Il6	protein_coding	chr4:3043231-3047807	+	3	2	13	36	49	71	3.20763	0.404109	1.93687e-08	1.3121e-06	interleukin 6	http://www.ncbi.nlm.nih.gov/gene/?term=24498
Fstl4	protein_coding	chr10:38104558-38534175	+	42	27	22	361	130	331	3.19241	2.68426	1.85813e-17	7.06529e-15	follistatin-like 4	http://www.ncbi.nlm.nih.gov/gene/?term=303130
Ccl1	protein_coding	chr10:69534976-69537836	-	3	0	1	22	3	13	3.13323	-1.41627	0.000995719	0.0157401	C-C motif chemokine ligand 1	http://www.ncbi.nlm.nih.gov/gene/?term=688605
Mab21l3	protein_coding	chr2:204231936-204269220	-	18	8	19	210	70	98	3.08924	1.58887	1.3673e-12	2.31342e-10	mab-21 like 3	http://www.ncbi.nlm.nih.gov/gene/?term=295326
RGD1566307	NA	chr1:73609570-73619570	-	47	45	47	223	391	471	3.07681	3.17176	2.65827e-19	1.49945e-16	leukocyte immunoglobulin like receptor B3	http://www.ncbi.nlm.nih.gov/gene/?term=308350
Slc7a11	protein_coding	chr2:139453774-139528482	-	83	68	79	740	540	563	3.07271	3.89119	7.39874e-45	6.54085e-41	solute carrier family 7 member 11	http://www.ncbi.nlm.nih.gov/gene/?term=310392
LOC102546998	lncRNA	chr1:281928066-281931095	-	3	0	0	16	7	4	3.05229	-1.76971	0.00353023	0.0433007	uncharacterized LOC102546998	http://www.ncbi.nlm.nih.gov/gene/?term=102546998
Rspo4	protein_coding	chr3:147358716-147391692	+	6	2	0	23	30	11	3.04338	-0.745199	7.58009e-05	0.00183972	R-spondin 4	http://www.ncbi.nlm.nih.gov/gene/?term=499918
LOC100364016	protein_coding	chr1:21145363-21146880	-	9	8	11	100	66	55	3.03334	0.879284	6.73626e-14	1.4179e-11	cyclin B2-like	http://www.ncbi.nlm.nih.gov/gene/?term=100364016
Prss30	protein_coding	chr10:13348289-13355837	-	13	10	6	75	113	32	3.03333	0.921017	6.55702e-08	3.97036e-06	protease, serine, 30	http://www.ncbi.nlm.nih.gov/gene/?term=287106
Mreg	protein_coding	chr9:79490058-79545024	-	28	29	34	332	153	231	3.01647	2.5163	3.4985e-23	3.53469e-20	melanoregulin	http://www.ncbi.nlm.nih.gov/gene/?term=501162
Esr1	protein_coding	chr1:41192150-41594799	+	124	146	114	1673	337	1109	3.01531	4.58412	4.78131e-16	1.50961e-13	estrogen receptor 1	http://www.ncbi.nlm.nih.gov/gene/?term=24890
Steap1	protein_coding	chr4:25435885-25446393	+	3	4	2	11	37	18	2.97564	-0.679888	6.22905e-05	0.00155669	STEAP family member 1	http://www.ncbi.nlm.nih.gov/gene/?term=297738
Tm4sf19	protein_coding	chr11:71607735-71619108	-	8	6	11	108	45	38	2.9578	0.66562	1.7768e-09	1.52874e-07	transmembrane 4 L six family member 19	http://www.ncbi.nlm.nih.gov/gene/?term=288044
Prnd	protein_coding	chr3:124543240-124548548	+	10	3	14	77	80	39	2.95504	0.745579	6.74046e-09	5.087e-07	prion protein 2 (dublet)	http://www.ncbi.nlm.nih.gov/gene/?term=113910
Fcrl2	protein_coding	chr2:186594442-186605115	-	91	63	113	806	543	613	2.94934	3.98896	2.01828e-37	7.13703e-34	Fc receptor-like 2	http://www.ncbi.nlm.nih.gov/gene/?term=310694
Snap91	protein_coding	chr8:94447558-94564906	-	16	8	8	127	36	84	2.94832	1.0092	7.50555e-10	6.9298e-08	synaptosomal-associated protein 91	http://www.ncbi.nlm.nih.gov/gene/?term=65178
LOC102552985	lncRNA	chr3:95100453-95102727	-	3	0	0	5	8	11	2.93929	-1.86637	0.00377533	0.0456456	uncharacterized LOC102552985	http://www.ncbi.nlm.nih.gov/gene/?term=102552985
Klk13	protein_coding	chr1:99648658-99660291	+	1	3	3	37	6	13	2.93534	-0.947707	0.00027674	0.00543973	kallikrein related-peptidase 13	http://www.ncbi.nlm.nih.gov/gene/?term=292848
Ocm2	protein_coding	chr12:12611105-12634472	+	2	0	1	10	8	6	2.92584	-1.87121	0.00137262	0.0203346	oncomodulin 2	http://www.ncbi.nlm.nih.gov/gene/?term=25503
Chst5	protein_coding	chr19:44115080-44136092	-	7	8	22	91	112	56	2.92547	1.14602	1.29153e-09	1.13328e-07	carbohydrate (N-acetylglucosamine 6-O) sulfotransferase 5	http://www.ncbi.nlm.nih.gov/gene/?term=307859
Col1a1	protein_coding	chr10:82745801-82762790	+	3986	5306	9878	23188	69908	33598	2.91674	10.1065	7.61737e-12	1.10396e-09	collagen type I alpha 1 chain	http://www.ncbi.nlm.nih.gov/gene/?term=29393
Msr1	protein_coding	chr16:56817714-56900024	-	345	234	295	3161	1129	2181	2.91367	5.67124	4.96071e-29	1.03189e-25	macrophage scavenger receptor 1	http://www.ncbi.nlm.nih.gov/gene/?term=498638
LOC680920	protein_coding	chr9:14850831-14864999	+	5	2	5	50	21	18	2.89618	-0.345241	8.24372e-07	3.87652e-05	similar to natural cytotoxicity triggering receptor 2	http://www.ncbi.nlm.nih.gov/gene/?term=680920
Rab7b	protein_coding	chr13:48456147-48482348	+	157	107	212	1529	770	1069	2.87936	4.75525	2.19597e-32	5.97338e-29	Rab7b, member RAS oncogene family	http://www.ncbi.nlm.nih.gov/gene/?term=501854
Rnase9	protein_coding	chr15:27964000-27968477	-	13	20	13	178	66	88	2.86789	1.43712	3.45037e-12	5.37498e-10	ribonuclease A family member 9	http://www.ncbi.nlm.nih.gov/gene/?term=364301
Tubb3	protein_coding	chr19:56220759-56229813	+	6	5	12	71	42	49	2.86403	0.466239	2.46824e-11	3.13295e-09	tubulin, beta 3 class III	http://www.ncbi.nlm.nih.gov/gene/?term=246118
Hk3	protein_coding	chr17:10134921-10152976	+	301	189	314	2578	1299	1758	2.86077	5.49853	5.63638e-37	1.81194e-33	hexokinase 3	http://www.ncbi.nlm.nih.gov/gene/?term=25060
C9	protein_coding	chr2:55775562-55823807	+	25	26	58	619	55	131	2.85442	2.62602	5.34472e-06	0.000195652	DAB2, clathrin adaptor protein	http://www.ncbi.nlm.nih.gov/gene/?term=79128
Hells	protein_coding	chr1:257901899-257949747	+	2	0	2	10	12	7	2.84587	-1.65966	0.00094914	0.0151392	helicase, lymphoid specific	http://www.ncbi.nlm.nih.gov/gene/?term=294071
Cthrc1	protein_coding	chr7:77966722-77977004	+	26	15	26	94	186	151	2.8136	1.8947	7.75557e-12	1.1194e-09	collagen triple helix repeat containing 1	http://www.ncbi.nlm.nih.gov/gene/?term=282836
LOC102548331	lncRNA	chr10:85541991-85548716	-	3	0	2	13	6	17	2.81123	-1.43324	0.000557265	0.0097458	uncharacterized LOC102548331	http://www.ncbi.nlm.nih.gov/gene/?term=102548331
Gjb6	protein_coding	chr15:37400888-37412177	-	6	1	11	70	16	39	2.79756	0.0966881	8.9948e-06	0.000303796	gap junction protein, beta 6	http://www.ncbi.nlm.nih.gov/gene/?term=84403
Noxo1	protein_coding	chr10:14056416-14066918	+	139	177	186	1940	490	1034	2.79475	4.76691	3.93911e-18	1.78583e-15	NADPH oxidase organizer 1	http://www.ncbi.nlm.nih.gov/gene/?term=302976
Kng1l1	protein_coding	chr11:81421672-81444466	-	7	9	9	93	22	57	2.77873	0.528462	5.26539e-08	3.29548e-06	kininogen 1-like 1	http://www.ncbi.nlm.nih.gov/gene/?term=288001
Ubd	protein_coding	chr20:1876175-1878126	-	35	14	74	371	259	157	2.77237	2.70657	1.45546e-09	1.25838e-07	ubiquitin D	http://www.ncbi.nlm.nih.gov/gene/?term=29168
LOC497796	protein_coding	chr4:164174739-164211869	-	1	4	5	17	13	37	2.77155	-0.679268	4.29769e-05	0.00114958	hypothetical protein LOC497796	http://www.ncbi.nlm.nih.gov/gene/?term=497796
Trh	protein_coding	chr4:124110716-124113242	-	6	2	2	22	26	18	2.77116	-0.68303	5.82012e-06	0.000210011	thyrotropin releasing hormone	http://www.ncbi.nlm.nih.gov/gene/?term=25569
Cxcl2	protein_coding	chr14:18731346-18733391	-	8	14	21	121	38	127	2.76077	1.24064	3.7053e-09	2.95106e-07	C-X-C motif chemokine ligand 2	http://www.ncbi.nlm.nih.gov/gene/?term=114105
Ctsk	protein_coding	chr2:196655469-196666447	+	213	195	298	1545	1500	1421	2.75991	5.22046	1.85808e-42	1.31411e-38	cathepsin K	http://www.ncbi.nlm.nih.gov/gene/?term=29175
Pla2g2a	protein_coding	chr5:157282650-157285295	+	31	35	121	361	475	306	2.75641	3.28284	2.60337e-10	2.69182e-08	phospholipase A2 group IIA	http://www.ncbi.nlm.nih.gov/gene/?term=29692
Ptges	protein_coding	chr3:9727408-9738752	-	3	6	3	23	35	18	2.73875	-0.490107	7.5133e-06	0.000260476	prostaglandin E synthase	http://www.ncbi.nlm.nih.gov/gene/?term=59103
Cxcl11	protein_coding	chr14:17195395-17198170	+	2	5	3	43	15	9	2.72335	-0.692893	0.000200927	0.00415023	C-X-C motif chemokine ligand 11	http://www.ncbi.nlm.nih.gov/gene/?term=305236
C4bpa	protein_coding	chr13:47342090-47377580	-	274	198	237	2536	578	1554	2.72097	5.20267	4.99687e-16	1.56371e-13	complement component 4 binding protein, alpha	http://www.ncbi.nlm.nih.gov/gene/?term=24235
Smtnl1	protein_coding	chr3:72207150-72219210	-	2	1	1	12	8	7	2.70999	-1.73168	0.00131643	0.0196835	smoothelin-like 1	http://www.ncbi.nlm.nih.gov/gene/?term=311167
Siglec15	protein_coding	chr18:74403384-74417333	-	4	0	1	16	11	6	2.69967	-1.51288	0.00167258	0.0239554	sialic acid binding Ig-like lectin 15	http://www.ncbi.nlm.nih.gov/gene/?term=498888
LOC102550137	lncRNA	chr4:180361321-180365194	-	12	24	16	125	94	104	2.6973	1.45429	2.49484e-15	6.68354e-13	uncharacterized LOC102550137	http://www.ncbi.nlm.nih.gov/gene/?term=102550137
C6	protein_coding	chr2:54460329-54533801	+	67	58	124	640	410	473	2.68827	3.65429	1.19038e-23	1.27558e-20	complement C6	http://www.ncbi.nlm.nih.gov/gene/?term=24237
Muc5b	protein_coding	chr1:214778459-214811237	+	633	892	3349	2630	21917	793	2.68144	7.90425	0.00275282	0.0357296	mucin 5B, oligomeric mucus/gel-forming	http://www.ncbi.nlm.nih.gov/gene/?term=309114
Hist1h2bcl1	protein_coding	chr17:44737895-44738394	-	51	30	137	511	398	379	2.66748	3.43013	1.67772e-11	2.20549e-09	histone cluster 1, H2bc-like 1	http://www.ncbi.nlm.nih.gov/gene/?term=680403
LOC100359539	misc_RNA	chr19:25391690-25394245	+	27	21	34	220	114	157	2.63265	2.0342	3.16239e-17	1.15287e-14	ribonucleotide reductase M2 polypeptide	http://www.ncbi.nlm.nih.gov/gene/?term=100359539
LOC102551701	lncRNA	chr20:23079331-23087869	+	4	0	2	26	4	9	2.62458	-1.3403	0.00415958	0.0492273	uncharacterized LOC102551701	http://www.ncbi.nlm.nih.gov/gene/?term=102551701
Cpxm1	protein_coding	chr3:122913886-122920684	-	57	38	75	330	324	317	2.61046	3.04612	1.93187e-21	1.45351e-18	carboxypeptidase X (M14 family), member 1	http://www.ncbi.nlm.nih.gov/gene/?term=296156
LOC102551814	lncRNA	chr8:100096195-100097970	+	7	2	1	34	5	24	2.60215	-0.764009	0.00102037	0.0160795	uncharacterized LOC102551814	http://www.ncbi.nlm.nih.gov/gene/?term=102551814
C3	protein_coding	chr9:9721137-9747084	+	7524	7626	10757	81254	23257	49491	2.5928	10.2705	4.28271e-20	2.61112e-17	complement C3	http://www.ncbi.nlm.nih.gov/gene/?term=24232
Tmem72	protein_coding	chr4:148819906-148845199	-	13	2	2	73	13	20	2.5881	-0.105725	0.000977137	0.0154879	transmembrane protein 72	http://www.ncbi.nlm.nih.gov/gene/?term=362424
Fcrlb	protein_coding	chr13:89284801-89291371	-	40	20	26	270	80	163	2.58712	2.07607	1.41606e-10	1.54551e-08	Fc receptor-like B	http://www.ncbi.nlm.nih.gov/gene/?term=498275
Slamf9	protein_coding	chr13:90836420-90839200	-	59	51	60	424	264	286	2.5788	3.02787	1.0757e-24	1.31168e-21	SLAM family member 9	http://www.ncbi.nlm.nih.gov/gene/?term=289235
Bpifb5	protein_coding	chr3:149706004-149724469	+	4	2	1	32	5	7	2.57099	-1.19763	0.00403352	0.048057	BPI fold containing family B, member 5	http://www.ncbi.nlm.nih.gov/gene/?term=690479
Asic2	protein_coding	chr10:68247800-69347223	-	18	12	12	144	25	81	2.55649	1.05959	9.42152e-07	4.3665e-05	acid sensing ion channel subunit 2	http://www.ncbi.nlm.nih.gov/gene/?term=25364
Ly6i	protein_coding	chr7:116419573-116425017	-	1318	1142	1093	11779	2733	6367	2.55262	7.38299	9.38653e-16	2.72071e-13	lymphocyte antigen 6 complex, locus I	http://www.ncbi.nlm.nih.gov/gene/?term=246138
Matk	protein_coding	chr7:11325246-11334300	-	75	53	96	492	374	365	2.53911	3.38156	1.09482e-23	1.20985e-20	megakaryocyte-associated tyrosine kinase	http://www.ncbi.nlm.nih.gov/gene/?term=60450
LOC100911844	pseudogene	chr3:167346121-167346630	+	0	2	2	10	5	9	2.536	-1.83926	0.00420727	0.0497251	60S ribosomal protein L24-like	http://www.ncbi.nlm.nih.gov/gene/?term=100911844
Rmi2	protein_coding	chr10:4904458-4910339	-	10	6	7	46	32	51	2.53484	0.205936	4.26468e-09	3.32175e-07	RecQ mediated genome instability 2	http://www.ncbi.nlm.nih.gov/gene/?term=497856
Slamf8	protein_coding	chr13:90967862-90978756	-	121	71	125	836	417	520	2.53442	3.87849	4.47863e-22	3.7708e-19	SLAM family member 8	http://www.ncbi.nlm.nih.gov/gene/?term=289237
Mcpt2	protein_coding	chr15:35032078-35034412	+	24	7	41	208	69	127	2.52666	1.75276	1.34166e-07	7.62762e-06	mast cell protease 2	http://www.ncbi.nlm.nih.gov/gene/?term=29266
Hist1h2bo	protein_coding	chr17:44756557-44758170	-	30	22	117	365	270	266	2.5216	2.93557	3.30703e-08	2.15763e-06	histone cluster 1, H2bo	http://www.ncbi.nlm.nih.gov/gene/?term=291157
LOC103693140	lncRNA	chr8:79119563-79123893	+	9	4	7	37	39	33	2.51645	-0.0013904	5.83998e-08	3.56672e-06	uncharacterized LOC103693140	http://www.ncbi.nlm.nih.gov/gene/?term=103693140
Tnfrsf4	protein_coding	chr5:173447784-173450474	+	7	14	18	75	77	56	2.50505	0.882587	6.40822e-10	6.0916e-08	TNF receptor superfamily member 4	http://www.ncbi.nlm.nih.gov/gene/?term=25572
Fcamr	protein_coding	chr13:47538783-47552799	+	19	29	58	320	98	168	2.4992	2.27672	3.03913e-09	2.4649e-07	Fc fragment of IgA and IgM receptor	http://www.ncbi.nlm.nih.gov/gene/?term=681070
Ccl17	protein_coding	chr19:10619220-10620671	-	10	8	4	65	27	31	2.49547	0.130267	5.44042e-07	2.69446e-05	C-C motif chemokine ligand 17	http://www.ncbi.nlm.nih.gov/gene/?term=117518
Lgals3	protein_coding	chr15:24153602-24165537	+	3295	1812	3134	19864	9977	14620	2.48262	8.52764	1.77481e-27	2.85276e-24	lectin, galactoside-binding, soluble, 3	http://www.ncbi.nlm.nih.gov/gene/?term=83781
Col11a1	protein_coding	chr2:216863425-217056523	+	34	22	22	53	229	101	2.47026	1.81779	5.6685e-06	0.000206224	collagen type XI alpha 1 chain	http://www.ncbi.nlm.nih.gov/gene/?term=25654
Folr2	protein_coding	chr1:166915045-166933377	-	69	42	81	439	269	301	2.45936	3.09474	1.46565e-19	8.55838e-17	folate receptor beta	http://www.ncbi.nlm.nih.gov/gene/?term=293154
Fabp5	protein_coding	chr2:93981659-93985358	-	81	84	104	634	257	547	2.45642	3.57905	3.19415e-19	1.68585e-16	fatty acid binding protein 5, epidermal	http://www.ncbi.nlm.nih.gov/gene/?term=140868
Pcp4	protein_coding	chr11:36851038-36912231	+	1	2	2	14	7	7	2.45609	-1.66949	0.00252476	0.0332888	Purkinje cell protein 4	http://www.ncbi.nlm.nih.gov/gene/?term=25510
LOC102549122	lncRNA	chrX:11287361-11298857	+	4	0	4	17	18	7	2.44405	-1.19567	0.00169574	0.0242478	uncharacterized LOC102549122	http://www.ncbi.nlm.nih.gov/gene/?term=102549122
Mis18a	protein_coding	chr11:30880231-30893262	-	5	3	3	23	17	18	2.4294	-0.81407	2.10339e-05	0.000623471	MIS18 kinetochore protein A	http://www.ncbi.nlm.nih.gov/gene/?term=288272
Cdca3	protein_coding	chr4:157347855-157351889	+	31	19	39	204	121	134	2.42826	1.97602	2.89718e-14	6.52548e-12	cell division cycle associated 3	http://www.ncbi.nlm.nih.gov/gene/?term=297594
Clec4a	protein_coding	chr4:156050040-156067518	+	15	9	14	74	69	50	2.42334	0.786957	1.01423e-09	9.07982e-08	C-type lectin domain family 4, member A	http://www.ncbi.nlm.nih.gov/gene/?term=474143
Cadm4	protein_coding	chr1:81365200-81369841	+	35	19	26	128	162	109	2.42251	1.82325	2.70676e-11	3.3703e-09	cell adhesion molecule 4	http://www.ncbi.nlm.nih.gov/gene/?term=365216
Tuba1c	protein_coding	chr7:140716113-140723717	+	57	48	63	161	488	137	2.41192	2.85784	7.58529e-07	3.60042e-05	tubulin, alpha 1C	http://www.ncbi.nlm.nih.gov/gene/?term=300218
Padi1	protein_coding	chr5:159338850-159371313	-	12	2	0	40	18	17	2.41145	-0.503017	0.00183455	0.0257434	peptidyl arginine deiminase 1	http://www.ncbi.nlm.nih.gov/gene/?term=54282
LOC367140	pseudogene	chr8:100103647-100107519	+	17	6	8	66	17	80	2.39847	0.515073	2.33164e-05	0.000682544	similar to Heterogeneous nuclear ribonucleoprotein A1 (Helix-destabilizing protein) (Single-strand RNA-binding protein) (hnRNP core protein A1) (HDP)	http://www.ncbi.nlm.nih.gov/gene/?term=367140
Chi3l1	protein_coding	chr13:51022826-51030797	+	2417	1524	3117	17941	5976	12144	2.38667	8.21629	5.00992e-17	1.73687e-14	chitinase 3 like 1	http://www.ncbi.nlm.nih.gov/gene/?term=89824
Ccr8	protein_coding	chr8:128781208-128782531	+	6	3	2	23	16	17	2.3735	-0.850863	5.64544e-05	0.00143622	C-C motif chemokine receptor 8	http://www.ncbi.nlm.nih.gov/gene/?term=301066
Dhrs9	protein_coding	chr3:55623671-55645883	+	110	34	107	670	266	329	2.37254	3.40517	7.72162e-10	7.11072e-08	dehydrogenase/reductase 9	http://www.ncbi.nlm.nih.gov/gene/?term=170635
Itgb8	protein_coding	chr6:147089280-147172845	-	288	339	386	2645	848	1642	2.36492	5.40793	2.7174e-19	1.50145e-16	integrin subunit beta 8	http://www.ncbi.nlm.nih.gov/gene/?term=362800
Sapcd2	protein_coding	chr3:2590366-2597283	+	38	24	39	197	125	174	2.35774	2.10008	6.19337e-16	1.90443e-13	suppressor APC domain containing 2	http://www.ncbi.nlm.nih.gov/gene/?term=680531
Ska1	protein_coding	chr18:70174316-70184368	-	5	3	9	40	20	25	2.35752	-0.329552	4.03615e-06	0.000154132	spindle and kinetochore associated complex subunit 1	http://www.ncbi.nlm.nih.gov/gene/?term=291441
Cd300lg	protein_coding	chr10:89976478-89995619	+	26	41	52	226	98	267	2.35724	2.33046	8.59297e-11	9.64649e-09	Cd300 molecule-like family member G	http://www.ncbi.nlm.nih.gov/gene/?term=684984
Scn10a	protein_coding	chr8:128298593-128416897	-	16	7	14	116	29	44	2.35339	0.71254	5.76163e-06	0.000208539	sodium voltage-gated channel alpha subunit 10	http://www.ncbi.nlm.nih.gov/gene/?term=29571
Gas2l3	protein_coding	chr7:29963129-29994889	-	71	60	53	391	202	315	2.34616	2.9519	2.29348e-18	1.06713e-15	growth arrest-specific 2 like 3	http://www.ncbi.nlm.nih.gov/gene/?term=680280
Klra5	protein_coding	chr4:162657771-165317573	-	3	3	3	28	11	7	2.34393	-1.09931	0.00134305	0.0200138	killer cell lectin-like receptor, subfamily A, member 5	http://www.ncbi.nlm.nih.gov/gene/?term=297666
RGD1305807	protein_coding	chr5:61425821-61467653	+	32	33	18	185	67	162	2.33496	1.82294	1.51406e-09	1.30586e-07	hypothetical LOC298077	http://www.ncbi.nlm.nih.gov/gene/?term=298077
Cxcl10	protein_coding	chr14:17210733-17212930	+	19	20	40	214	111	57	2.33299	1.72479	3.77195e-07	1.92473e-05	C-X-C motif chemokine ligand 10	http://www.ncbi.nlm.nih.gov/gene/?term=245920
LOC100363502	protein_coding	chr18:62475572-62476771	-	4	2	3	15	16	13	2.33075	-1.12776	0.000293286	0.00572678	cytochrome c, somatic-like	http://www.ncbi.nlm.nih.gov/gene/?term=100363502
H19	lncRNA	chr1:215744404-215747080	-	22	6	18	96	79	44	2.33056	0.972689	6.15393e-07	2.97695e-05	H19, imprinted maternally expressed transcript (non-protein coding)	http://www.ncbi.nlm.nih.gov/gene/?term=309122
LOC680663	protein_coding	chrX:110670037-110782420	+	8	1	3	21	15	23	2.32798	-0.779819	0.000166158	0.00353962	hypothetical protein LOC680663	http://www.ncbi.nlm.nih.gov/gene/?term=680663
RGD1561231	protein_coding	chr17:89448908-89459908	+	260	138	210	2047	270	786	2.32686	4.64665	3.24798e-07	1.68303e-05	similar to MAP/microtubule affinity-regulating kinase 4 (MAP/microtubule affinity-regulating kinase like 1)	http://www.ncbi.nlm.nih.gov/gene/?term=498781
Steap3	protein_coding	chr13:36257220-36274144	-	74	62	93	504	292	301	2.32136	3.23331	2.94187e-19	1.60047e-16	STEAP3 metalloreductase	http://www.ncbi.nlm.nih.gov/gene/?term=170824
Uhrf1	protein_coding	chr9:10739306-10758403	-	39	16	36	195	107	134	2.3146	1.91737	1.79987e-11	2.3486e-09	ubiquitin-like with PHD and ring finger domains 1	http://www.ncbi.nlm.nih.gov/gene/?term=316129
Prlhr	protein_coding	chr1:281754472-281756159	-	2	2	2	13	4	13	2.29258	-1.57924	0.00400334	0.0478588	prolactin releasing hormone receptor	http://www.ncbi.nlm.nih.gov/gene/?term=246075
Arg1	protein_coding	chr1:21525421-21537872	+	178	147	202	1083	403	1034	2.29206	4.40676	4.65814e-17	1.6309e-14	arginase 1	http://www.ncbi.nlm.nih.gov/gene/?term=29221
Cenpw	protein_coding	chr1:29915443-29920598	+	12	9	19	87	42	58	2.27122	0.737564	8.72919e-09	6.43086e-07	centromere protein W	http://www.ncbi.nlm.nih.gov/gene/?term=689399
Tpx2	protein_coding	chr3:148327965-148370187	+	103	67	103	511	343	379	2.24362	3.42289	1.03503e-20	7.03862e-18	TPX2, microtubule nucleation factor	http://www.ncbi.nlm.nih.gov/gene/?term=311546
Upk3a	protein_coding	chr7:125920357-125925430	+	10	2	2	28	12	26	2.24276	-0.638183	0.000531509	0.00935551	uroplakin 3A	http://www.ncbi.nlm.nih.gov/gene/?term=315190
LOC103692658	lncRNA	chr14:18862282-18864474	+	7	4	2	35	10	17	2.23836	-0.725868	0.000576521	0.010028	uncharacterized LOC103692658	http://www.ncbi.nlm.nih.gov/gene/?term=103692658
Mrgprx2	protein_coding	chr1:103744699-103745583	-	11	1	9	38	20	38	2.23192	-0.149322	3.96197e-05	0.00107938	MAS-related GPR, member X2	http://www.ncbi.nlm.nih.gov/gene/?term=404640
Itgam	protein_coding	chr1:199495307-199545738	+	870	543	1150	5127	2824	3487	2.22267	6.61857	6.79323e-22	5.4596e-19	integrin subunit alpha M	http://www.ncbi.nlm.nih.gov/gene/?term=25021
Scamp5	protein_coding	chr8:62222648-62248011	-	8	7	8	34	25	44	2.21463	-0.0442464	7.7009e-07	3.65039e-05	secretory carrier membrane protein 5	http://www.ncbi.nlm.nih.gov/gene/?term=65171
Slc37a2	protein_coding	chr8:39708678-39734313	-	109	119	149	747	421	512	2.2145	3.86056	1.37996e-23	1.43524e-20	coiled-coil domain containing 15	http://www.ncbi.nlm.nih.gov/gene/?term=367056
LOC102554462	lncRNA	chr16:51141589-51176983	+	8	3	5	18	29	23	2.21349	-0.523685	7.15934e-05	0.00175324	uncharacterized LOC102554462	http://www.ncbi.nlm.nih.gov/gene/?term=102554462
Cfb	protein_coding	chr20:4536206-4542073	-	4444	2973	4701	26461	10426	17887	2.21292	8.8578	4.82973e-21	3.3488e-18	complement factor B	http://www.ncbi.nlm.nih.gov/gene/?term=294257
Nlrp1b	protein_coding	chr10:57756307-57846439	-	6	3	1	21	12	13	2.2119	-1.07057	0.000801248	0.013154	NLR family, pyrin domain containing 1B	http://www.ncbi.nlm.nih.gov/gene/?term=691998
LOC102550122	lncRNA	chr2:210643308-210645871	+	14	5	10	65	25	42	2.2106	0.267125	3.11395e-06	0.000124004	uncharacterized LOC102550122	http://www.ncbi.nlm.nih.gov/gene/?term=102550122
Bub1b	protein_coding	chr3:110367954-110420471	+	80	64	80	402	241	352	2.20948	3.11409	3.44044e-20	2.1344e-17	BUB1 mitotic checkpoint serine/threonine kinase B	http://www.ncbi.nlm.nih.gov/gene/?term=171576
Igsf7	protein_coding	chr10:104975789-104980853	+	275	238	366	1139	1110	1544	2.20242	5.06459	1.5548e-25	2.19924e-22	immunoglobulin superfamily, member 7	http://www.ncbi.nlm.nih.gov/gene/?term=287813
Pdcd1lg2	protein_coding	chr1:247562202-247627193	+	10	6	9	50	25	37	2.20108	0.0580393	5.94778e-07	2.88909e-05	programmed cell death 1 ligand 2	http://www.ncbi.nlm.nih.gov/gene/?term=309304
LOC103689965	protein_coding	chr20:4495440-4508226	-	968	526	992	5315	2293	3474	2.19967	6.56124	1.82513e-18	8.72168e-16	complement C4-like	http://www.ncbi.nlm.nih.gov/gene/?term=103689965
Siglec1	protein_coding	chr3:123612067-123631845	-	249	194	230	1275	690	1016	2.19837	4.68473	3.65327e-28	7.17705e-25	sialic acid binding Ig like lectin 1	http://www.ncbi.nlm.nih.gov/gene/?term=311426
Wt1	protein_coding	chr3:95133242-95180574	+	26	12	27	67	101	108	2.19548	1.33992	5.64626e-08	3.46239e-06	Wilms tumor 1	http://www.ncbi.nlm.nih.gov/gene/?term=24883
Tnfrsf9	protein_coding	chr5:168009041-168035813	+	30	16	25	128	84	99	2.19178	1.47187	2.27662e-11	2.91687e-09	TNF receptor superfamily member 9	http://www.ncbi.nlm.nih.gov/gene/?term=500590
Scn4b	protein_coding	chr8:49441106-49456279	+	13	8	16	59	62	37	2.18629	0.556695	4.86951e-07	2.43903e-05	sodium voltage-gated channel beta subunit 4	http://www.ncbi.nlm.nih.gov/gene/?term=315611
C4b	protein_coding	chr20:4302344-4316752	-	1030	710	1615	6550	3663	4165	2.1692	6.95917	5.93999e-19	3.00072e-16	complement component 4A (Rodgers blood group)	http://www.ncbi.nlm.nih.gov/gene/?term=24233
Shcbp1	protein_coding	chr16:90613825-90642683	+	43	18	56	227	122	155	2.16813	2.14652	1.07563e-09	9.55687e-08	SHC binding and spindle associated 1	http://www.ncbi.nlm.nih.gov/gene/?term=364648
En1	protein_coding	chr13:36532758-36537888	+	6	2	2	24	8	13	2.1591	-1.09956	0.00174825	0.0248379	engrailed homeobox 1	http://www.ncbi.nlm.nih.gov/gene/?term=685360
Lum	protein_coding	chr7:38820058-38826862	+	232	130	313	714	1280	710	2.15523	4.63853	2.6169e-10	2.69793e-08	lumican	http://www.ncbi.nlm.nih.gov/gene/?term=81682
LOC100910200	protein_coding	chr17:44792982-44793894	-	189	130	459	1287	928	1016	2.15233	4.82804	4.54052e-11	5.38798e-09	histone H2B type 1-C/E/G-like	http://www.ncbi.nlm.nih.gov/gene/?term=100910200
Cpa3	protein_coding	chr2:105016798-105047989	-	32	15	28	139	51	135	2.14686	1.51643	8.40586e-08	4.99576e-06	carboxypeptidase A3	http://www.ncbi.nlm.nih.gov/gene/?term=54242
Kcnc4	protein_coding	chr2:210220908-210241447	-	11	10	6	62	18	39	2.14303	0.132251	1.95405e-05	0.000586082	potassium voltage-gated channel subfamily C member 4	http://www.ncbi.nlm.nih.gov/gene/?term=684516
Kif11	protein_coding	chr1:256035866-256088299	+	96	123	160	665	408	516	2.13411	3.8002	3.92653e-21	2.81209e-18	kinesin family member 11	http://www.ncbi.nlm.nih.gov/gene/?term=171304
Slc6a12	protein_coding	chr4:153921199-153941333	+	58	60	86	392	222	239	2.12477	2.90662	2.92032e-15	7.7066e-13	solute carrier family 6 member 12	http://www.ncbi.nlm.nih.gov/gene/?term=50676
Bcat1	protein_coding	chr4:179259305-179340021	-	107	107	152	618	397	495	2.11324	3.73373	1.98957e-22	1.80398e-19	branched chain amino acid transaminase 1	http://www.ncbi.nlm.nih.gov/gene/?term=29592
Rad51	protein_coding	chr3:110918243-110942920	+	21	18	22	119	60	76	2.10933	1.19676	9.82228e-10	8.81562e-08	kinetochore scaffold 1	http://www.ncbi.nlm.nih.gov/gene/?term=311327
Hist1h2bf	protein_coding	chr17:44748472-44748910	+	47	64	179	488	343	337	2.10727	3.37344	2.27158e-08	1.51561e-06	histone cluster 1, H2bf	http://www.ncbi.nlm.nih.gov/gene/?term=306969
Tpsab1	protein_coding	chr10:14701253-14703668	-	102	18	64	251	194	308	2.10438	2.74763	1.34249e-06	5.95648e-05	tryptase alpha/beta 1	http://www.ncbi.nlm.nih.gov/gene/?term=54271
LOC102554723	NA	chr3:53695271-53822031	+	2	7	5	39	8	14	2.10163	-0.73213	0.00295551	0.0377711	uncharacterized LOC102554723	http://www.ncbi.nlm.nih.gov/gene/?term=102554723
Tmem171	protein_coding	chr2:28791831-28802140	-	26	25	35	163	82	111	2.09945	1.66514	4.19757e-11	4.9978e-09	transmembrane protein 171	http://www.ncbi.nlm.nih.gov/gene/?term=293634
LOC103693389	protein_coding	chr10:63551791-63567069	+	71	92	78	360	249	379	2.09828	3.13197	4.26774e-18	1.91033e-15	breakpoint cluster region protein-like	http://www.ncbi.nlm.nih.gov/gene/?term=103693389
LOC103691246	NA	chr1:203364828-203383035	+	4	2	7	19	20	14	2.09516	-0.864679	0.000283282	0.00554673	uncharacterized LOC103691246	http://www.ncbi.nlm.nih.gov/gene/?term=103691246
Ttk	protein_coding	chr8:91368393-91405995	+	38	39	51	239	131	156	2.09456	2.22201	2.14746e-13	4.19772e-11	Ttk protein kinase	http://www.ncbi.nlm.nih.gov/gene/?term=315852
Hist1h2bd	protein_coding	chr17:44833924-44834305	-	46	28	72	247	154	189	2.08686	2.39333	3.38164e-11	4.13777e-09	histone cluster 1, H2bd	http://www.ncbi.nlm.nih.gov/gene/?term=361247
Prkar1b	protein_coding	chr12:17614472-17713567	+	25	14	17	139	36	62	2.08337	1.07127	5.95398e-06	0.000214186	protein kinase cAMP-dependent type 1 regulatory subunit beta	http://www.ncbi.nlm.nih.gov/gene/?term=25521
Cdk1	protein_coding	chr20:20576343-20591510	+	76	50	114	452	243	276	2.07971	3.09688	2.10016e-12	3.48666e-10	cyclin-dependent kinase 1	http://www.ncbi.nlm.nih.gov/gene/?term=54237
Hist1h2bk	protein_coding	chr17:44527421-44527801	-	116	78	171	627	411	421	2.07584	3.69368	3.84916e-15	1.00084e-12	histone cluster 1, H2bk	http://www.ncbi.nlm.nih.gov/gene/?term=680312
Hist3h2bb	protein_coding	chr10:45296638-45297385	-	13	8	20	80	42	44	2.07029	0.613034	5.94185e-07	2.88909e-05	histone cluster 3, H2bb	http://www.ncbi.nlm.nih.gov/gene/?term=691488
Asf1b	protein_coding	chr19:25077918-25092491	+	30	31	41	189	104	118	2.06611	1.87848	1.07171e-11	1.49204e-09	anti-silencing function 1B histone chaperone	http://www.ncbi.nlm.nih.gov/gene/?term=304648
Cdc6	protein_coding	chr10:86819573-86833301	+	27	20	32	149	72	99	2.0656	1.5199	4.9661e-10	4.79812e-08	cell division cycle 6	http://www.ncbi.nlm.nih.gov/gene/?term=360621
Ube2c	protein_coding	chr3:161236971-161239371	+	32	24	35	150	110	102	2.06382	1.71567	1.56585e-11	2.07385e-09	ubiquitin-conjugating enzyme E2C	http://www.ncbi.nlm.nih.gov/gene/?term=296368
Mcoln3	protein_coding	chr2:251930532-252007722	+	53	45	56	238	160	217	2.06267	2.46098	8.99564e-16	2.62896e-13	mucolipin 3	http://www.ncbi.nlm.nih.gov/gene/?term=308022
Galr3	protein_coding	chr7:120273117-120276243	+	8	16	6	61	13	52	2.06032	0.217903	0.000302097	0.0058632	galanin receptor 3	http://www.ncbi.nlm.nih.gov/gene/?term=29235
Serpina3n	protein_coding	chr6:128073344-128080878	+	48	34	74	234	211	163	2.05981	2.46557	5.04345e-11	5.90552e-09	serine (or cysteine) peptidase inhibitor, clade A, member 3N	http://www.ncbi.nlm.nih.gov/gene/?term=24795
Rrm2	protein_coding	chr6:43884627-43890818	+	191	128	166	921	426	613	2.05643	4.0989	1.19517e-17	4.74871e-15	ribonucleotide reductase regulatory subunit M2	http://www.ncbi.nlm.nih.gov/gene/?term=362720
Capg	protein_coding	chr4:100402301-100419447	+	1533	803	1492	7030	3408	4923	2.05444	7.0664	5.26509e-18	2.3273e-15	capping actin protein, gelsolin like	http://www.ncbi.nlm.nih.gov/gene/?term=297339
LOC102549173	protein_coding	chr17:43626081-43626652	-	344	236	581	1713	1396	1397	2.05351	5.33433	1.52963e-16	5.1515e-14	histone H3.2-like	http://www.ncbi.nlm.nih.gov/gene/?term=102549173
LOC100359692	protein_coding	chr17:44519815-44520269	-	36	22	48	181	124	111	2.04687	1.91173	4.3069e-10	4.26775e-08	histone cluster 1, H2bc-like	http://www.ncbi.nlm.nih.gov/gene/?term=100359692
Lilrb4	protein_coding	chr1:73393946-73681855	-	291	316	427	1173	1049	1788	2.04062	5.16757	2.72759e-20	1.75228e-17	leukocyte immunoglobulin like receptor B4	http://www.ncbi.nlm.nih.gov/gene/?term=292594
Melk	protein_coding	chr5:59783836-59844356	+	37	32	45	186	113	150	2.03868	2.0137	5.23998e-13	9.45388e-11	maternal embryonic leucine zipper kinase	http://www.ncbi.nlm.nih.gov/gene/?term=362510
Ccl3	protein_coding	chr10:70869516-70871066	-	58	41	103	389	141	275	2.03817	2.81606	7.26806e-09	5.45675e-07	C-C motif chemokine ligand 3	http://www.ncbi.nlm.nih.gov/gene/?term=25542
Tnn	protein_coding	chr13:77829384-77897844	-	24	29	23	97	102	95	2.03661	1.44568	3.58266e-10	3.57881e-08	tenascin N	http://www.ncbi.nlm.nih.gov/gene/?term=304913
LOC680322	protein_coding	chr17:44528005-44528553	+	67	29	77	289	202	181	2.0358	2.59669	7.04323e-10	6.58896e-08	similar to Histone H2A type 1	http://www.ncbi.nlm.nih.gov/gene/?term=680322
Prss22	protein_coding	chr10:13370098-13374808	-	7	4	2	22	15	15	2.03105	-0.888476	0.000592136	0.010225	protease, serine, 22	http://www.ncbi.nlm.nih.gov/gene/?term=302971
Tnfaip6	protein_coding	chr3:37545238-37564704	+	14	7	21	44	53	63	2.0259	0.602254	1.94238e-06	8.21606e-05	TNF alpha induced protein 6	http://www.ncbi.nlm.nih.gov/gene/?term=84397
LOC680329	protein_coding	chr11:86088629-86092916	+	4127	1915	2209	14903	9242	8093	2.02008	8.16011	3.70703e-13	6.93588e-11	immunoglobulin lambda-like polypeptide 5-like	http://www.ncbi.nlm.nih.gov/gene/?term=680329
Mcpt1l1	protein_coding	chr15:34609785-34612441	-	39	3	35	96	75	124	2.0166	1.43648	0.000254714	0.00506877	mast cell protease 1-like 1	http://www.ncbi.nlm.nih.gov/gene/?term=100360872
Bcl2a1	protein_coding	chr8:96551424-96559527	+	450	230	680	2367	1170	1713	2.01205	5.5287	4.42459e-12	6.74406e-10	BCL2-related protein A1	http://www.ncbi.nlm.nih.gov/gene/?term=170929
Batf	protein_coding	chr6:109562407-109584541	+	64	38	80	339	149	220	2.00688	2.64883	2.07257e-10	2.18112e-08	basic leucine zipper ATF-like transcription factor	http://www.ncbi.nlm.nih.gov/gene/?term=299206
Top2a	protein_coding	chr10:86901467-86930947	-	94	70	103	429	253	347	2.00677	3.19938	6.18078e-17	2.12199e-14	topoisomerase (DNA) II alpha	http://www.ncbi.nlm.nih.gov/gene/?term=360243
Cd68	protein_coding	chr10:56268726-56270605	-	191	145	316	953	586	951	2.00646	4.46903	6.63551e-16	2.0228e-13	Cd68 molecule	http://www.ncbi.nlm.nih.gov/gene/?term=287435
Mcpt1l3	protein_coding	chr15:34926579-34930551	+	9	4	9	30	21	34	2.00321	-0.260716	2.31379e-05	0.000679569	mast cell protease 1-like 3	http://www.ncbi.nlm.nih.gov/gene/?term=408209
Tmem86a	protein_coding	chr1:103173032-103177382	+	145	124	166	765	408	504	2.00121	3.89468	2.67138e-19	1.49945e-16	transmembrane protein 86A	http://www.ncbi.nlm.nih.gov/gene/?term=308602
Hist1h2ac	protein_coding	chr17:44520491-44521142	+	129	47	132	489	336	340	1.996	3.38976	4.79165e-10	4.68073e-08	histone cluster 1, H2ac	http://www.ncbi.nlm.nih.gov/gene/?term=306962
Baalc	protein_coding	chr7:77763246-77836534	+	211	210	215	1012	552	883	1.99505	4.43974	9.16187e-24	1.0451e-20	brain and acute leukemia, cytoplasmic	http://www.ncbi.nlm.nih.gov/gene/?term=140720
Mcm10	protein_coding	chr17:77224218-77245486	+	50	24	43	152	122	168	1.99181	2.01418	1.75946e-10	1.87404e-08	minichromosome maintenance 10 replication initiation factor	http://www.ncbi.nlm.nih.gov/gene/?term=307126
Il1rn	protein_coding	chr3:1450536-1468624	+	671	420	758	2962	1879	2147	1.98802	5.96222	5.09872e-22	4.19305e-19	interleukin 1 receptor antagonist	http://www.ncbi.nlm.nih.gov/gene/?term=60582
Galnt5	protein_coding	chr3:44025964-44072073	+	156	168	165	930	358	609	1.9856	4.05544	2.11814e-15	5.76167e-13	polypeptide N-acetylgalactosaminyltransferase 5	http://www.ncbi.nlm.nih.gov/gene/?term=83627
Serpinf1	protein_coding	chr10:62241750-62254145	-	61	37	86	163	335	152	1.98224	2.63238	2.13288e-06	8.88375e-05	serpin family F member 1	http://www.ncbi.nlm.nih.gov/gene/?term=287526
Muc4	protein_coding	chr11:71242973-71285227	-	17	16	13	111	34	35	1.97392	0.718297	4.74314e-05	0.00124118	mucin 4, cell surface associated	http://www.ncbi.nlm.nih.gov/gene/?term=303887
Cxcl13	protein_coding	chr14:15253146-15258223	-	33	51	77	157	318	86	1.97266	2.43173	4.6359e-05	0.00122339	C-X-C motif chemokine ligand 13	http://www.ncbi.nlm.nih.gov/gene/?term=498335
Gja3	protein_coding	chr15:37298607-37325370	-	13	6	12	47	24	47	1.97206	0.169709	8.19437e-06	0.000279579	gap junction protein, alpha 3	http://www.ncbi.nlm.nih.gov/gene/?term=79217
Tph1	protein_coding	chr1:102669868-102699442	-	32	6	12	63	51	74	1.97087	0.819839	6.69505e-05	0.00165444	tryptophan hydroxylase 1	http://www.ncbi.nlm.nih.gov/gene/?term=24848
Acat2	protein_coding	chr1:47972399-47992654	+	74	67	98	569	149	211	1.96995	3.01314	1.44624e-07	8.1566e-06	acetyl-CoA acetyltransferase 2	http://www.ncbi.nlm.nih.gov/gene/?term=308100
Cd300le	protein_coding	chr10:103581384-103590607	-	114	103	158	248	460	640	1.96741	3.64884	6.07144e-09	4.60726e-07	Cd300 molecule-like family member E	http://www.ncbi.nlm.nih.gov/gene/?term=360655
Hs6st2	protein_coding	chrX:138675326-138972781	-	50	61	61	219	191	225	1.96391	2.54072	1.24566e-14	2.9366e-12	heparan sulfate 6-O-sulfotransferase 2	http://www.ncbi.nlm.nih.gov/gene/?term=302489
Lgmn	protein_coding	chr6:126282246-126308207	-	787	645	880	3602	2009	3044	1.96149	6.26667	6.52783e-28	1.15419e-24	legumain	http://www.ncbi.nlm.nih.gov/gene/?term=63865
Clec5a	protein_coding	chr4:68810330-68819912	-	97	42	83	427	169	247	1.95974	2.90093	7.8005e-09	5.84409e-07	C-type lectin domain family 5, member A	http://www.ncbi.nlm.nih.gov/gene/?term=679787
LOC102549125	pseudogene	chr20:28611561-28613634	+	5	4	6	30	8	20	1.9567	-0.760667	0.000873148	0.0141245	leucine-rich repeat-containing protein 57-like	http://www.ncbi.nlm.nih.gov/gene/?term=102549125
Hist1h2bl	protein_coding	chr17:43817378-43817745	+	39	19	52	180	111	115	1.95351	1.88951	1.58002e-08	1.11129e-06	histone cluster 1, H2bl	http://www.ncbi.nlm.nih.gov/gene/?term=64647
Aoc1	protein_coding	chr4:78496043-78515585	+	507	294	590	2554	1106	1555	1.95269	5.52259	1.68104e-14	3.93676e-12	amine oxidase, copper containing 1	http://www.ncbi.nlm.nih.gov/gene/?term=65029
Wfdc21	protein_coding	chr10:71047326-71053195	+	19	4	18	22	68	52	1.94063	0.490821	0.00110017	0.0170499	WAP four-disulfide core domain 21	http://www.ncbi.nlm.nih.gov/gene/?term=360228
Mcm5	protein_coding	chr19:14523495-14561281	+	165	120	264	816	558	616	1.93911	4.16892	3.5988e-15	9.42672e-13	minichromosome maintenance complex component 5	http://www.ncbi.nlm.nih.gov/gene/?term=291885
Tiam1	protein_coding	chr11:29931083-30061173	-	213	201	274	1016	655	840	1.93572	4.49955	6.88677e-25	8.69749e-22	T-cell lymphoma invasion and metastasis 1	http://www.ncbi.nlm.nih.gov/gene/?term=304109
Has2	protein_coding	chr7:96438046-96464049	-	16	4	26	77	38	53	1.92646	0.654969	6.75344e-05	0.0016677	hyaluronan synthase 2	http://www.ncbi.nlm.nih.gov/gene/?term=25694
Syt13	protein_coding	chr3:81814287-81854604	+	25	9	13	67	62	40	1.92394	0.693149	1.55217e-05	0.000484874	synaptotagmin 13	http://www.ncbi.nlm.nih.gov/gene/?term=80977
Vcan	protein_coding	chr2:18490102-18587340	-	477	478	643	1875	2127	1610	1.92333	5.70203	2.01346e-20	1.31852e-17	versican	http://www.ncbi.nlm.nih.gov/gene/?term=114122
Gpr113	NA	chr6:27534663-27546804	+	14	22	18	114	33	56	1.92191	0.894004	1.12112e-05	0.00037017	adhesion G protein-coupled receptor F3	http://www.ncbi.nlm.nih.gov/gene/?term=298857
Racgap1	protein_coding	chr7:141277303-141307298	-	10	2	2	16	18	17	1.92082	-0.880995	0.00357932	0.0438268	Rac GTPase-activating protein 1	http://www.ncbi.nlm.nih.gov/gene/?term=315298
Serpine2	protein_coding	chr9:85560852-85626125	-	101	137	132	652	279	432	1.91898	3.60102	1.08264e-13	2.22583e-11	serpin family E member 2	http://www.ncbi.nlm.nih.gov/gene/?term=29366
Tacr1	protein_coding	chr4:113247236-113416139	+	15	10	27	74	86	20	1.91737	0.800566	0.000688643	0.0115961	tachykinin receptor 1	http://www.ncbi.nlm.nih.gov/gene/?term=24807
Nusap1	protein_coding	chr3:111422267-111452600	+	67	58	86	323	182	257	1.9118	2.78685	1.07026e-13	2.21326e-11	nucleolar and spindle associated protein 1	http://www.ncbi.nlm.nih.gov/gene/?term=311336
Srd5a1	protein_coding	chr1:36320504-36354694	+	246	203	264	1249	489	880	1.91115	4.53451	1.23106e-15	3.48261e-13	steroid 5 alpha-reductase 1	http://www.ncbi.nlm.nih.gov/gene/?term=24950
LOC690126	protein_coding	chr2:198379864-198380888	-	95	91	164	421	406	399	1.90934	3.50126	4.89488e-14	1.06605e-11	hypothetical protein LOC690126	http://www.ncbi.nlm.nih.gov/gene/?term=690126
LOC100910554	protein_coding	chr17:44738555-44739195	+	58	22	64	205	149	158	1.90893	2.2365	1.98497e-08	1.33955e-06	histone H2A type 1-like	http://www.ncbi.nlm.nih.gov/gene/?term=100910554
Kif14	protein_coding	chr13:53350073-53421992	+	43	34	50	172	139	138	1.90111	2.0578	7.9316e-12	1.14015e-09	kinesin family member 14	http://www.ncbi.nlm.nih.gov/gene/?term=360849
Pdlim4	protein_coding	chr10:39390578-39405311	-	27	6	26	70	73	63	1.90058	0.975491	2.05799e-05	0.00061258	PDZ and LIM domain 4	http://www.ncbi.nlm.nih.gov/gene/?term=24915
Cenpi	protein_coding	chrX:105147061-105198798	+	28	34	39	154	83	126	1.89892	1.73562	2.47422e-10	2.56579e-08	centromere protein I	http://www.ncbi.nlm.nih.gov/gene/?term=25448
Ccl9	protein_coding	chr10:70783426-70788372	-	180	127	207	548	482	778	1.89829	4.05023	1.90522e-15	5.26347e-13	chemokine (C-C motif) ligand 9	http://www.ncbi.nlm.nih.gov/gene/?term=360579
Syt8	protein_coding	chr1:215605408-215607602	+	15	3	10	44	23	34	1.89258	-0.0213034	0.000133535	0.0029579	synaptotagmin 8	http://www.ncbi.nlm.nih.gov/gene/?term=60566
Timp1	protein_coding	chrX:1364771-1369451	-	81	44	103	232	313	228	1.88572	2.86862	1.24232e-08	8.96552e-07	TIMP metallopeptidase inhibitor 1	http://www.ncbi.nlm.nih.gov/gene/?term=116510
Nog	protein_coding	chr10:76811759-76813386	-	22	22	40	111	83	100	1.88447	1.45798	3.49371e-09	2.79513e-07	noggin	http://www.ncbi.nlm.nih.gov/gene/?term=25495
Kcnn4	protein_coding	chr1:81227855-81245986	+	267	211	356	1305	795	836	1.88437	4.73254	8.45098e-19	4.19935e-16	potassium calcium-activated channel subfamily N member 4	http://www.ncbi.nlm.nih.gov/gene/?term=65206
Sectm1a	protein_coding	chr10:110263782-110274795	-	9	10	5	24	24	37	1.88378	-0.228386	9.38269e-05	0.00221785	secreted and transmembrane 1A	http://www.ncbi.nlm.nih.gov/gene/?term=287885
Cryba4	protein_coding	chr12:50407843-50414432	+	28	7	10	58	36	67	1.88268	0.613965	0.000113279	0.00257275	crystallin, beta A4	http://www.ncbi.nlm.nih.gov/gene/?term=64348
Muc5ac	protein_coding	chr1:214725485-214756653	+	19	9	10	38	75	14	1.8826	0.354099	0.00297272	0.0378952	mucin 5AC, oligomeric mucus/gel-forming	http://www.ncbi.nlm.nih.gov/gene/?term=682837
Ect2	protein_coding	chr2:112769385-112831476	-	37	22	29	136	81	95	1.8812	1.53182	4.05994e-09	3.20463e-07	epithelial cell transforming 2	http://www.ncbi.nlm.nih.gov/gene/?term=361921
Msc	protein_coding	chr5:3954902-3956974	+	21	17	18	58	59	78	1.87785	0.898482	1.26955e-07	7.25266e-06	musculin	http://www.ncbi.nlm.nih.gov/gene/?term=312897
Myh1	protein_coding	chr10:53740830-53764610	+	46	15	26	134	59	119	1.87703	1.51841	4.81144e-06	0.000179475	myosin heavy chain 1	http://www.ncbi.nlm.nih.gov/gene/?term=287408
Il1r2	protein_coding	chr9:46840642-46881239	+	141	74	128	602	192	437	1.86823	3.45137	1.29845e-08	9.31353e-07	interleukin 1 receptor type 2	http://www.ncbi.nlm.nih.gov/gene/?term=117022
Atp1a3	protein_coding	chr1:81852425-81881549	-	50	30	58	177	162	133	1.86606	2.14467	1.29924e-09	1.13722e-07	ATPase Na+/K+ transporting subunit alpha 3	http://www.ncbi.nlm.nih.gov/gene/?term=24213
Gins1	protein_coding	chr3:146695366-146716787	+	24	18	24	98	58	75	1.86339	1.11512	1.72161e-08	1.20078e-06	GINS complex subunit 1	http://www.ncbi.nlm.nih.gov/gene/?term=499914
Ccnb1	protein_coding	chr2:30783916-30791100	-	23	11	23	91	57	50	1.85834	0.905548	1.70095e-06	7.30526e-05	cyclin B1	http://www.ncbi.nlm.nih.gov/gene/?term=25203
Mcpt10	protein_coding	chr15:34622126-34625141	-	7	7	12	37	14	41	1.8571	-0.144548	0.000220675	0.00448994	mast cell protease 10	http://www.ncbi.nlm.nih.gov/gene/?term=54269
LOC100364194	protein_coding	chr10:82487796-82492927	-	9	6	4	24	15	28	1.85571	-0.541922	0.000433001	0.00792534	transmembrane protein 92-like	http://www.ncbi.nlm.nih.gov/gene/?term=100364194
Pycr1	protein_coding	chr10:109817300-109822226	-	8	2	6	22	15	19	1.85334	-0.764799	0.000598699	0.0103173	pyrroline-5-carboxylate reductase 1	http://www.ncbi.nlm.nih.gov/gene/?term=287877
C1s	protein_coding	chr4:157143592-157155592	-	1038	567	1195	3538	3067	2862	1.85203	6.4506	5.44838e-16	1.69005e-13	complement C1s	http://www.ncbi.nlm.nih.gov/gene/?term=192262
Depdc1	protein_coding	chr2:264704734-264738265	+	17	14	41	94	57	96	1.85048	1.21121	3.31778e-06	0.000130359	DEP domain containing 1	http://www.ncbi.nlm.nih.gov/gene/?term=295538
Kif22	protein_coding	chr1:198461406-198476430	-	41	34	34	179	96	105	1.84973	1.81059	2.62847e-09	2.17677e-07	kinesin family member 22	http://www.ncbi.nlm.nih.gov/gene/?term=293502
Tuba8	protein_coding	chr4:153774511-153791223	+	13	7	22	80	19	50	1.8461	0.484385	0.000335497	0.00641288	tubulin, alpha 8	http://www.ncbi.nlm.nih.gov/gene/?term=500377
Hmox1	protein_coding	chr19:14508634-14515455	+	550	389	620	2307	1173	1915	1.84437	5.60458	3.41562e-19	1.77622e-16	heme oxygenase 1	http://www.ncbi.nlm.nih.gov/gene/?term=24451
Pbk	protein_coding	chr15:42489257-42500377	+	27	21	41	143	61	105	1.84182	1.51048	1.55772e-07	8.7435e-06	PDZ binding kinase	http://www.ncbi.nlm.nih.gov/gene/?term=290326
Ctsz	protein_coding	chr3:172527107-172537877	-	1380	834	1388	5114	2972	4291	1.84149	6.81031	6.82658e-20	4.09155e-17	cathepsin Z	http://www.ncbi.nlm.nih.gov/gene/?term=252929
Ns5atp9	protein_coding	chr8:71514281-71526182	+	14	24	30	82	66	83	1.8407	1.133	7.38931e-08	4.42882e-06	NS5A (hepatitis C virus) transactivated protein 9	http://www.ncbi.nlm.nih.gov/gene/?term=300795
LOC103694381	protein_coding	chr20:4861335-4863493	-	7	7	15	52	22	27	1.8404	-0.0180792	0.000141929	0.00312314	lymphotoxin-beta	http://www.ncbi.nlm.nih.gov/gene/?term=103694381
LOC100909441	protein_coding	chr2:199196126-199203741	+	30	16	28	117	67	70	1.8352	1.25183	1.84657e-07	1.01711e-05	tubulin alpha-1C chain-like	http://www.ncbi.nlm.nih.gov/gene/?term=100909441
Kcnip4	protein_coding	chr14:65549366-66747926	+	20	15	27	82	44	87	1.83512	1.00396	6.38572e-07	3.06809e-05	potassium voltage-gated channel interacting protein 4	http://www.ncbi.nlm.nih.gov/gene/?term=259243
Knstrn	protein_coding	chr3:110618257-110638024	+	27	37	42	153	100	107	1.82971	1.74894	7.83772e-10	7.1989e-08	kinetochore-localized astrin/SPAG5 binding protein	http://www.ncbi.nlm.nih.gov/gene/?term=311325
RGD1561778	protein_coding	chr10:104997205-104999942	+	47	131	106	124	313	491	1.82914	3.14741	8.69498e-05	0.00207052	similar to dendritic cell-derived immunoglobulin(Ig)-like receptor 1, DIgR1 - mouse	http://www.ncbi.nlm.nih.gov/gene/?term=303666
Hist1h1b	protein_coding	chr17:44766313-44766981	+	321	303	458	1443	1169	998	1.82723	5.06295	1.47633e-19	8.55838e-17	histone cluster 1, H1b	http://www.ncbi.nlm.nih.gov/gene/?term=680522
C1qa	protein_coding	chr5:155261254-155264101	-	590	309	642	2128	1411	1656	1.82678	5.57166	9.96168e-16	2.86394e-13	complement C1q A chain	http://www.ncbi.nlm.nih.gov/gene/?term=298566
Hist1h2ak	protein_coding	chr17:44840990-44841382	-	152	78	188	538	410	445	1.82161	3.68857	1.40114e-11	1.89836e-09	histone cluster 1, H2ak	http://www.ncbi.nlm.nih.gov/gene/?term=680615
Prdx5	protein_coding	chr1:222164462-222167447	-	590	336	655	2335	1186	1842	1.81759	5.60183	4.08688e-15	1.05489e-12	peroxiredoxin 5	http://www.ncbi.nlm.nih.gov/gene/?term=113898
Gpr176	protein_coding	chr3:110042853-110140756	-	78	79	71	268	268	219	1.81668	2.83111	3.43125e-12	5.36885e-10	G protein-coupled receptor 176	http://www.ncbi.nlm.nih.gov/gene/?term=117257
Gapdh-ps2	pseudogene	chr16:25773573-25774845	+	10	9	11	51	21	31	1.8123	0.0135367	5.27239e-05	0.00135792	glyceraldehyde-3-phosphate dehydrogenase, pseudogene 2	http://www.ncbi.nlm.nih.gov/gene/?term=689689
Iqgap3	protein_coding	chr2:187447501-187489630	+	159	144	224	684	459	617	1.81226	4.01725	2.52346e-18	1.15889e-15	IQ motif containing GTPase activating protein 3	http://www.ncbi.nlm.nih.gov/gene/?term=310621
Scd1	NA	chr1:264159966-264173061	-	6202	2518	4689	19175	9571	16778	1.81078	8.6856	2.70411e-11	3.3703e-09	stearoyl-CoA desaturase	http://www.ncbi.nlm.nih.gov/gene/?term=246074
Cks2	protein_coding	chr17:13587664-13593423	-	6	7	13	42	23	23	1.81011	-0.184451	0.000139743	0.00308272	CDC28 protein kinase regulatory subunit 2	http://www.ncbi.nlm.nih.gov/gene/?term=498709
Cep55	protein_coding	chr1:256745250-256760794	+	66	27	48	210	120	146	1.80966	2.14077	5.51729e-08	3.39308e-06	centrosomal protein 55	http://www.ncbi.nlm.nih.gov/gene/?term=294074
Tmc5	protein_coding	chr1:188288738-188337310	+	119	116	199	483	650	249	1.80962	3.73011	3.50232e-07	1.80538e-05	transmembrane channel-like 5	http://www.ncbi.nlm.nih.gov/gene/?term=365360
LOC684841	NA	chr17:43806922-43807563	-	444	237	487	1555	1167	1140	1.80813	5.15809	7.13292e-15	1.75163e-12	similar to CG31613-PA	http://www.ncbi.nlm.nih.gov/gene/?term=684841
Ntrk2	protein_coding	chr17:5934690-6245662	-	127	247	315	773	1078	330	1.80759	4.39315	7.78009e-06	0.000268133	neurotrophic receptor tyrosine kinase 2	http://www.ncbi.nlm.nih.gov/gene/?term=25054
LOC103690190	protein_coding	chr17:44747670-44748233	-	239	144	295	864	701	663	1.80571	4.37216	2.04588e-14	4.72852e-12	histone H2A type 1-E	http://www.ncbi.nlm.nih.gov/gene/?term=103690190
Hist1h3a	protein_coding	chr17:43616203-43634463	+	749	513	1052	2983	2266	2350	1.80291	6.13474	2.57637e-17	9.59007e-15	histone cluster 1, H3a	http://www.ncbi.nlm.nih.gov/gene/?term=679994
Mybl2	protein_coding	chr3:159421637-159450087	+	51	50	43	194	138	147	1.79853	2.16486	2.8239e-11	3.49156e-09	myeloblastosis oncogene-like 2	http://www.ncbi.nlm.nih.gov/gene/?term=296344
Bhlhe41	protein_coding	chr4:180230742-180235143	-	440	300	391	1454	1037	1252	1.79643	5.11074	3.01754e-22	2.6026e-19	basic helix-loop-helix family, member e41	http://www.ncbi.nlm.nih.gov/gene/?term=117095
Cemip	protein_coding	chr1:146069774-146226314	-	115	183	149	723	351	432	1.79519	3.77805	2.26866e-12	3.73136e-10	cell migration-inducing hyaluronan binding protein	http://www.ncbi.nlm.nih.gov/gene/?term=308797
LOC100365043	protein_coding	chr17:43808620-43809092	+	213	121	277	832	591	573	1.7902	4.20868	2.86503e-12	4.62618e-10	histone cluster 1, H2bd-like	http://www.ncbi.nlm.nih.gov/gene/?term=100365043
Rspo3	protein_coding	chr1:30682049-30765160	+	7	9	6	24	21	28	1.78808	-0.409467	0.000131401	0.00291774	R-spondin 3	http://www.ncbi.nlm.nih.gov/gene/?term=498997
Tubb2b	protein_coding	chr17:31441640-31444687	+	75	56	76	262	206	209	1.78673	2.66562	1.20217e-12	2.05368e-10	tubulin, beta 2B class IIb	http://www.ncbi.nlm.nih.gov/gene/?term=291081
Myo7a	protein_coding	chr1:163001313-163071542	-	64	30	33	157	137	122	1.78665	1.97974	1.80373e-07	9.98178e-06	myosin VIIA	http://www.ncbi.nlm.nih.gov/gene/?term=266714
C2cd4b	protein_coding	chr8:73589884-73594516	+	81	152	97	320	340	411	1.78379	3.33727	3.13049e-10	3.18104e-08	C2 calcium-dependent domain containing 4B	http://www.ncbi.nlm.nih.gov/gene/?term=501015
RGD1563231	protein_coding	chr3:16999133-16999789	-	10	18	11	55	39	35	1.78358	0.340594	1.58772e-05	0.000491796	similar to immunoglobulin kappa-chain VK-1	http://www.ncbi.nlm.nih.gov/gene/?term=502832
Spag5	protein_coding	chr10:65566228-65585773	+	85	59	83	289	222	230	1.78263	2.79405	1.10583e-12	1.89827e-10	sperm associated antigen 5	http://www.ncbi.nlm.nih.gov/gene/?term=252918
Hp	protein_coding	chr19:42096255-42100805	+	588	472	855	3419	1057	1979	1.78177	5.84702	2.90799e-10	2.97203e-08	haptoglobin	http://www.ncbi.nlm.nih.gov/gene/?term=24464
Pf4	protein_coding	chr14:18848549-18849258	-	15	17	33	81	38	96	1.77967	1.02404	1.5759e-05	0.000490555	platelet factor 4	http://www.ncbi.nlm.nih.gov/gene/?term=360918
Clec2dl1	protein_coding	chr4:162391376-162402569	+	28	4	15	48	52	52	1.77924	0.581247	0.000517616	0.00913826	C-type lectin domain family 2 member D-like 1	http://www.ncbi.nlm.nih.gov/gene/?term=689790
Ifi30	protein_coding	chr16:20426566-20430772	+	1415	961	1603	5542	3401	4088	1.77827	6.9028	1.23217e-20	8.22113e-18	IFI30, lysosomal thiol reductase	http://www.ncbi.nlm.nih.gov/gene/?term=290644
Fcgr2b	protein_coding	chr13:89329298-89344169	-	287	212	279	1417	486	720	1.77739	4.55712	5.24404e-11	6.12012e-09	Fc fragment of IgG, low affinity IIb, receptor	http://www.ncbi.nlm.nih.gov/gene/?term=289211
LOC680498	protein_coding	chr17:44759999-44764062	+	442	312	621	1706	1450	1237	1.77188	5.36134	2.45789e-15	6.6348e-13	similar to CG31613-PA	http://www.ncbi.nlm.nih.gov/gene/?term=680498
Col5a3	protein_coding	chr8:21786324-21831736	-	104	111	123	229	536	270	1.77116	3.35059	1.18615e-06	5.36797e-05	collagen type V alpha 3 chain	http://www.ncbi.nlm.nih.gov/gene/?term=60379
Sel1l3	protein_coding	chr14:60122984-60229565	+	186	266	269	1079	541	756	1.76969	4.44042	6.91376e-16	2.08961e-13	SEL1L family member 3	http://www.ncbi.nlm.nih.gov/gene/?term=360945
Birc5	protein_coding	chr10:106856097-106864419	+	28	16	27	96	53	84	1.76813	1.14438	3.30678e-07	1.70957e-05	baculoviral IAP repeat-containing 5	http://www.ncbi.nlm.nih.gov/gene/?term=64041
LOC103693056	lncRNA	chr14:66328774-66333866	-	25	33	33	152	52	100	1.76678	1.49463	1.19903e-06	5.39443e-05	uncharacterized LOC103693056	http://www.ncbi.nlm.nih.gov/gene/?term=103693056
Fndc1	protein_coding	chr1:47605213-47687497	+	153	133	193	423	668	391	1.76477	3.84373	1.97375e-09	1.68183e-07	fibronectin type III domain containing 1	http://www.ncbi.nlm.nih.gov/gene/?term=308099
Duoxa1	protein_coding	chr3:114241057-114251710	-	60	27	40	236	73	118	1.76405	1.96538	1.03e-05	0.000343856	dual oxidase maturation factor 1	http://www.ncbi.nlm.nih.gov/gene/?term=311374
Sgol2	NA	chr9:64898420-64923023	+	71	72	79	323	179	224	1.7637	2.74954	2.63722e-12	4.29758e-10	shugoshin 2	http://www.ncbi.nlm.nih.gov/gene/?term=316425
Kifc1	protein_coding	chr20:5509059-5526175	+	85	73	111	344	255	265	1.76139	3.01613	2.1486e-13	4.19772e-11	kinesin family member C1	http://www.ncbi.nlm.nih.gov/gene/?term=294286
E2f7	protein_coding	chr7:53275659-53318261	+	31	30	38	163	81	80	1.75901	1.60183	1.8965e-07	1.04137e-05	E2F transcription factor 7	http://www.ncbi.nlm.nih.gov/gene/?term=314818
Ddias	protein_coding	chr1:157675754-157700064	-	12	10	12	55	19	39	1.75848	0.143289	0.000102609	0.00237453	DNA damage-induced apoptosis suppressor	http://www.ncbi.nlm.nih.gov/gene/?term=499204
Kntc1	protein_coding	chr12:38200463-38274157	-	17	16	23	93	46	44	1.75641	0.807876	6.33465e-06	0.000225393	kinetochore associated 1	http://www.ncbi.nlm.nih.gov/gene/?term=304477
LOC102551959	not_pseudo	chr6:142309911-142353523	-	37	22	18	181	32	52	1.75553	1.27434	0.00107367	0.0167699	Ig heavy chain V region IR2-like	http://www.ncbi.nlm.nih.gov/gene/?term=102551959
Anln	protein_coding	chr8:23336455-23397115	-	30	34	51	132	94	142	1.75078	1.7999	5.98058e-09	4.55787e-07	anillin, actin binding protein-like 1	http://www.ncbi.nlm.nih.gov/gene/?term=307056
Arl11	protein_coding	chr15:41639963-41645685	+	318	216	373	1189	756	963	1.75	4.75034	8.81327e-18	3.58224e-15	ADP-ribosylation factor like GTPase 11	http://www.ncbi.nlm.nih.gov/gene/?term=364396
Icos	protein_coding	chr9:67748157-67786808	+	158	169	185	757	487	401	1.74992	3.93429	5.67552e-14	1.20902e-11	inducible T-cell co-stimulator	http://www.ncbi.nlm.nih.gov/gene/?term=64545
Cgref1	protein_coding	chr6:26797126-26809132	+	21	19	28	74	61	82	1.74934	1.06653	8.93375e-08	5.26525e-06	cell growth regulator with EF hand domain 1	http://www.ncbi.nlm.nih.gov/gene/?term=245918
Slc22a1	protein_coding	chr1:48273639-48300645	+	12	10	8	35	25	37	1.74667	-0.0344657	3.72564e-05	0.00102367	solute carrier family 22 member 1	http://www.ncbi.nlm.nih.gov/gene/?term=24904
Mylk2	protein_coding	chr3:148386185-148397851	+	33	25	39	130	46	141	1.74325	1.56267	7.02661e-06	0.000246015	myosin light chain kinase 2	http://www.ncbi.nlm.nih.gov/gene/?term=117558
Cd33	protein_coding	chr1:98398469-98403206	+	194	112	195	767	343	516	1.74307	3.89484	3.42023e-11	4.17056e-09	CD33 molecule	http://www.ncbi.nlm.nih.gov/gene/?term=690492
Xkr5	protein_coding	chr16:75744786-75762694	+	8	6	17	38	33	27	1.74263	-0.0117579	0.000174857	0.00369372	XK related 5	http://www.ncbi.nlm.nih.gov/gene/?term=497083
Kif20b	protein_coding	chr1:253220037-253275523	+	84	58	101	327	195	254	1.73925	2.85397	2.53549e-11	3.20215e-09	kinesin family member 20B	http://www.ncbi.nlm.nih.gov/gene/?term=309523
Il2ra	protein_coding	chr17:70500672-70547929	-	10	18	14	59	30	47	1.73891	0.408707	1.45289e-05	0.000459133	interleukin 2 receptor subunit alpha	http://www.ncbi.nlm.nih.gov/gene/?term=25704
RGD1559482	protein_coding	chr10:104952458-104957149	+	438	210	529	1337	930	1445	1.73519	5.10914	3.48023e-11	4.22914e-09	similar to immunoglobulin superfamily, member 7	http://www.ncbi.nlm.nih.gov/gene/?term=498022
Diaph3	protein_coding	chr15:69928507-70400055	-	21	25	18	99	55	52	1.7332	0.98211	2.38655e-06	9.80178e-05	diaphanous-related formin 3	http://www.ncbi.nlm.nih.gov/gene/?term=290396
Sele	protein_coding	chr13:82355229-82365323	+	46	20	67	205	97	122	1.72992	1.98454	6.0666e-06	0.000217573	selectin E	http://www.ncbi.nlm.nih.gov/gene/?term=25544
Adamts4	protein_coding	chr13:89622996-89632485	+	42	41	53	137	163	118	1.72592	2.01894	2.19044e-08	1.46606e-06	ADAM metallopeptidase with thrombospondin type 1 motif, 4	http://www.ncbi.nlm.nih.gov/gene/?term=66015
Anlnl1	protein_coding	chr17:66539477-66553118	+	10	7	10	29	27	29	1.72437	-0.195233	8.57632e-05	0.0020463	anillin, actin binding protein-like 1	http://www.ncbi.nlm.nih.gov/gene/?term=307056
LOC100360781	protein_coding	chr10:64336084-64336558	+	22	24	76	135	99	143	1.72085	1.84284	2.67044e-05	0.000770874	ribosomal protein L37-like	http://www.ncbi.nlm.nih.gov/gene/?term=100360781
LOC102549061	protein_coding	chr17:43627882-43628518	+	272	184	483	1086	826	990	1.72006	4.76565	3.85443e-11	4.63202e-09	histone H2B type 1-N-like	http://www.ncbi.nlm.nih.gov/gene/?term=102549061
LOC100360754	protein_coding	chr17:44758415-44758903	+	486	250	527	1623	1107	1217	1.71968	5.20242	1.83079e-13	3.61678e-11	histone cluster 1, H2ae-like	http://www.ncbi.nlm.nih.gov/gene/?term=100360754
Smpdl3a	protein_coding	chr20:40779022-40800842	+	1381	833	1317	4765	2598	3819	1.71832	6.68769	3.51159e-17	1.26711e-14	sphingomyelin phosphodiesterase, acid-like 3A	http://www.ncbi.nlm.nih.gov/gene/?term=294422
Casc5	NA	chr3:110847318-110909807	+	59	56	76	229	168	199	1.71586	2.49499	6.04089e-12	8.86382e-10	kinetochore scaffold 1	http://www.ncbi.nlm.nih.gov/gene/?term=311327
Ccr5	protein_coding	chr8:133210484-133215599	+	335	287	313	1384	759	819	1.71549	4.77598	2.11889e-17	7.97109e-15	chemokine (C-C motif) receptor 5	http://www.ncbi.nlm.nih.gov/gene/?term=117029
Sdf2l1	protein_coding	chr11:88122271-88124513	+	514	235	459	1527	915	1350	1.71239	5.13679	3.38545e-12	5.32072e-10	coiled-coil domain containing 116	http://www.ncbi.nlm.nih.gov/gene/?term=287936
Fdps	protein_coding	chr2:188403595-188413219	-	317	279	356	1882	429	802	1.71127	4.79575	2.09809e-07	1.14672e-05	farnesyl diphosphate synthase	http://www.ncbi.nlm.nih.gov/gene/?term=83791
LOC684828	protein_coding	chr17:43797711-43798451	-	780	578	970	2726	2394	2014	1.71052	6.07663	1.55197e-17	5.96529e-15	similar to Histone H1.2 (H1 VAR.1) (H1c)	http://www.ncbi.nlm.nih.gov/gene/?term=684828
Mms22l	protein_coding	chr5:38844494-38960989	+	87	76	96	361	216	235	1.7094	2.92652	4.85088e-12	7.33064e-10	MMS22-like, DNA repair protein	http://www.ncbi.nlm.nih.gov/gene/?term=313108
Duox1	protein_coding	chr3:114251818-114286827	+	471	337	436	2123	777	1091	1.70868	5.18025	1.89642e-11	2.45645e-09	dual oxidase 1	http://www.ncbi.nlm.nih.gov/gene/?term=266807
Chst1	protein_coding	chr3:81496772-81512829	+	328	459	497	2080	854	1153	1.70798	5.22188	8.51354e-13	1.49779e-10	carbohydrate sulfotransferase 1	http://www.ncbi.nlm.nih.gov/gene/?term=295934
Rasgrf1	protein_coding	chr8:97277250-97405095	+	20	10	6	38	44	29	1.70464	0.175671	0.00054885	0.00961766	RAS protein-specific guanine nucleotide-releasing factor 1	http://www.ncbi.nlm.nih.gov/gene/?term=192213
Ckap2	protein_coding	chr16:74752655-74779184	+	43	54	71	239	112	178	1.70442	2.30353	8.23833e-09	6.10742e-07	cytoskeleton associated protein 2	http://www.ncbi.nlm.nih.gov/gene/?term=306575
Srxn1	protein_coding	chr3:147603969-147632824	+	157	143	144	651	270	492	1.70406	3.69894	1.04452e-11	1.46573e-09	sulfiredoxin 1	http://www.ncbi.nlm.nih.gov/gene/?term=296271
Plk1	protein_coding	chr1:192115990-192125969	+	61	51	78	244	162	183	1.7022	2.4761	6.77538e-11	7.77892e-09	polo-like kinase 1	http://www.ncbi.nlm.nih.gov/gene/?term=25515
Ctsd	protein_coding	chr1:215541570-215553446	-	8659	5510	8798	29671	14495	27911	1.69939	9.37258	5.6728e-15	1.43287e-12	cathepsin D	http://www.ncbi.nlm.nih.gov/gene/?term=171293
Elf3	protein_coding	chr13:52083873-52088791	-	296	304	342	1363	677	904	1.69206	4.766	1.26103e-17	4.95472e-15	E74-like factor 3	http://www.ncbi.nlm.nih.gov/gene/?term=304815
Dhcr7	protein_coding	chr1:217018916-217034890	+	132	127	160	739	262	326	1.69076	3.60071	1.18881e-08	8.66774e-07	7-dehydrocholesterol reductase	http://www.ncbi.nlm.nih.gov/gene/?term=64191
Inhba	protein_coding	chr17:51894598-51920674	-	61	37	61	157	150	175	1.68749	2.21321	3.89044e-09	3.09154e-07	inhibin beta A subunit	http://www.ncbi.nlm.nih.gov/gene/?term=29200
LOC100910898	NA	chr6:76675399-76708260	+	648	556	714	2845	1063	2129	1.68657	5.7845	1.78697e-13	3.55005e-11	breast cancer metastasis-suppressor 1-like protein-like	http://www.ncbi.nlm.nih.gov/gene/?term=100910898
Pcdh9	protein_coding	chr15:76787110-77738641	-	132	141	91	609	180	377	1.68567	3.41002	3.18622e-07	1.66182e-05	protocadherin 9	http://www.ncbi.nlm.nih.gov/gene/?term=306091
Ptx3	protein_coding	chr2:158097843-158103653	+	46	102	84	138	255	294	1.68489	2.7491	8.24045e-06	0.000280731	pentraxin 3	http://www.ncbi.nlm.nih.gov/gene/?term=689388
Cdkn3	protein_coding	chr15:23553168-23564538	+	42	31	62	171	120	120	1.68327	1.97318	3.32e-08	2.16209e-06	cyclin-dependent kinase inhibitor 3	http://www.ncbi.nlm.nih.gov/gene/?term=289993
Nuggc	protein_coding	chr15:49011951-49055246	+	25	22	25	110	54	60	1.68249	1.1038	1.91651e-06	8.1261e-05	nuclear GTPase, germinal center associated	http://www.ncbi.nlm.nih.gov/gene/?term=290325
LOC102554171	lncRNA	chr16:22325667-22326736	+	259	233	260	1138	461	753	1.67902	4.43411	3.45802e-13	6.50439e-11	uncharacterized LOC102554171	http://www.ncbi.nlm.nih.gov/gene/?term=102554171
Abcb4	protein_coding	chr4:22133984-22192654	-	54	39	39	171	115	119	1.67863	1.95151	8.22553e-09	6.10742e-07	ATP binding cassette subfamily B member 4	http://www.ncbi.nlm.nih.gov/gene/?term=24891
RGD1309489	misc_RNA	chr7:83670282-83804882	+	20	31	12	69	47	79	1.67817	0.926282	2.89435e-05	0.000821427	similar to Est1p-like protein B	http://www.ncbi.nlm.nih.gov/gene/?term=314915
MGC105649	protein_coding	chr3:114772603-114776158	+	274	191	310	1127	538	731	1.67808	4.47057	2.64131e-13	5.10394e-11	hypothetical LOC302884	http://www.ncbi.nlm.nih.gov/gene/?term=302884
Fam167b	protein_coding	chr5:147782692-147784348	-	9	4	12	26	35	13	1.67704	-0.346288	0.00381342	0.0459925	family with sequence similarity 167, member B	http://www.ncbi.nlm.nih.gov/gene/?term=682360
Scimp	protein_coding	chr10:57415838-57436111	-	98	114	185	444	316	440	1.67519	3.50214	1.10003e-11	1.52546e-09	SLP adaptor and CSK interacting membrane protein	http://www.ncbi.nlm.nih.gov/gene/?term=691993
Folr1	protein_coding	chr1:166934457-166943592	-	12	5	13	26	24	41	1.67289	-0.0965999	0.000488134	0.00872228	folate receptor 1	http://www.ncbi.nlm.nih.gov/gene/?term=171049
Cd63	protein_coding	chr7:3320250-3335581	+	3020	2327	3996	11397	7043	9940	1.67221	8.04955	3.97035e-19	2.03478e-16	Cd63 molecule	http://www.ncbi.nlm.nih.gov/gene/?term=29186
Tpsb2	protein_coding	chr10:14722672-14724464	+	193	47	129	420	268	438	1.67141	3.40508	8.25217e-06	0.00028086	tryptase beta 2	http://www.ncbi.nlm.nih.gov/gene/?term=29268
Col3a1	protein_coding	chr9:52023295-52059221	+	22999	23213	38099	74200	92458	79558	1.66777	11.217	4.91394e-14	1.06605e-11	collagen type III alpha 1 chain	http://www.ncbi.nlm.nih.gov/gene/?term=84032
Ifitm1	protein_coding	chr1:213765831-213767841	+	429	430	601	1870	1327	1192	1.66634	5.37188	7.00413e-18	2.9841e-15	interferon induced transmembrane protein 1	http://www.ncbi.nlm.nih.gov/gene/?term=293618
Rassf4	protein_coding	chr4:148769092-148803988	-	220	267	287	946	710	673	1.66602	4.46319	7.18571e-18	2.98943e-15	Ras association domain family member 4	http://www.ncbi.nlm.nih.gov/gene/?term=362423
Cdca2	protein_coding	chr15:44365396-44411309	-	41	37	33	142	82	115	1.66246	1.69574	1.98959e-08	1.34011e-06	cell division cycle associated 2	http://www.ncbi.nlm.nih.gov/gene/?term=305984
Tmem176b	protein_coding	chr4:78450724-78458537	-	425	273	462	1383	990	1109	1.66209	5.03851	8.01254e-17	2.72442e-14	transmembrane protein 176B	http://www.ncbi.nlm.nih.gov/gene/?term=171411
Nek2	protein_coding	chr13:110511546-110524750	+	70	57	72	273	169	161	1.6618	2.51585	1.03487e-09	9.24114e-08	NIMA-related kinase 2	http://www.ncbi.nlm.nih.gov/gene/?term=114482
LOC103694908	protein_coding	chrUn_KL568483v1:601-13578	-	10	7	12	33	29	25	1.65761	-0.150548	0.000174359	0.0036854	low affinity immunoglobulin gamma Fc region receptor III-like	http://www.ncbi.nlm.nih.gov/gene/?term=103694908
Sod2	protein_coding	chr1:47914757-47921587	-	1078	1119	1385	5163	2320	3475	1.65712	6.66078	3.62891e-17	1.29622e-14	superoxide dismutase 2, mitochondrial	http://www.ncbi.nlm.nih.gov/gene/?term=24787
Hist1h2ail	NA	chr17:43814773-43815183	-	216	103	273	695	535	525	1.65649	4.05992	2.47015e-09	2.06013e-07	histone cluster 1, H2ai-like1	http://www.ncbi.nlm.nih.gov/gene/?term=291159
Col1a2	protein_coding	chr4:29529504-31569152	+	1801	1436	1775	3885	5930	4660	1.65408	7.14612	4.02084e-13	7.3671e-11	collagen type I alpha 2 chain	http://www.ncbi.nlm.nih.gov/gene/?term=84352
Hist1h1a	protein_coding	chr17:43614101-43614844	-	188	110	306	759	501	534	1.65333	4.08182	5.32323e-09	4.08912e-07	histone cluster 1, H1a	http://www.ncbi.nlm.nih.gov/gene/?term=291145
Cadps	protein_coding	chr15:15275489-15690575	+	19	35	52	174	54	98	1.65189	1.61337	7.48298e-05	0.0018199	calcium dependent secretion activator	http://www.ncbi.nlm.nih.gov/gene/?term=26989
Cpxm2	protein_coding	chr1:204048785-204161090	-	309	169	304	977	742	602	1.65127	4.46381	1.91609e-11	2.47288e-09	carboxypeptidase X (M14 family), member 2	http://www.ncbi.nlm.nih.gov/gene/?term=293566
Sp6	protein_coding	chr10:84955864-84960045	+	17	19	11	67	22	56	1.64208	0.503187	0.000235979	0.00474399	Sp6 transcription factor	http://www.ncbi.nlm.nih.gov/gene/?term=363672
Serpinb1a	protein_coding	chr17:32903089-32911498	+	1141	669	1088	3931	1946	2811	1.63349	6.33807	6.362e-14	1.34714e-11	serine (or cysteine) proteinase inhibitor, clade B, member 1a	http://www.ncbi.nlm.nih.gov/gene/?term=291091
RGD1307182	protein_coding	chr9:14645429-14654381	-	48	51	66	198	172	111	1.6333	2.22379	1.08604e-07	6.27523e-06	similar to RIKEN cDNA B430306N03 gene	http://www.ncbi.nlm.nih.gov/gene/?term=316207
Pld3	protein_coding	chr1:84339269-84361686	-	757	629	815	2658	1643	2229	1.63172	5.94121	2.09174e-22	1.84921e-19	phospholipase D family, member 3	http://www.ncbi.nlm.nih.gov/gene/?term=361527
Fetub	protein_coding	chr11:81648890-81661915	-	716	634	712	2873	1165	2186	1.62772	5.84717	2.69077e-14	6.13877e-12	fetuin B	http://www.ncbi.nlm.nih.gov/gene/?term=83928
Cilp	protein_coding	chr8:70760163-70775891	+	131	102	156	444	363	324	1.62511	3.44126	4.27709e-12	6.54747e-10	cartilage intermediate layer protein	http://www.ncbi.nlm.nih.gov/gene/?term=315761
Wisp1	protein_coding	chr7:107695227-107723759	+	16	9	13	26	55	26	1.62482	0.170316	0.00175418	0.0248921	WNT1 inducible signaling pathway protein 1	http://www.ncbi.nlm.nih.gov/gene/?term=65154
Tmem176a	protein_coding	chr4:78458735-78462415	+	735	606	892	2632	1841	2060	1.62373	5.95279	3.97615e-21	2.81209e-18	transmembrane protein 176A	http://www.ncbi.nlm.nih.gov/gene/?term=297077
Cd84	protein_coding	chr13:90241321-90278392	+	137	157	200	573	442	423	1.62283	3.78219	3.97772e-14	8.84654e-12	CD84 molecule	http://www.ncbi.nlm.nih.gov/gene/?term=501872
LOC102547995	pseudogene	chr14:66449226-66451534	-	8	12	4	37	15	21	1.62222	-0.395647	0.00279966	0.0361345	H/ACA ribonucleoprotein complex subunit 4-like	http://www.ncbi.nlm.nih.gov/gene/?term=102547995
Cenpe	protein_coding	chr2:240395974-240454785	+	144	146	211	628	373	473	1.62203	3.80002	9.54564e-14	1.98561e-11	centromere protein E	http://www.ncbi.nlm.nih.gov/gene/?term=362044
Niacr1	protein_coding	chr12:38160464-38161546	+	105	71	129	440	179	292	1.62103	3.08921	2.76807e-08	1.81604e-06	niacin receptor 1	http://www.ncbi.nlm.nih.gov/gene/?term=353250
Gch1	protein_coding	chr15:23935011-23968971	-	152	143	162	533	332	478	1.6164	3.67043	4.36397e-15	1.11825e-12	GTP cyclohydrolase 1	http://www.ncbi.nlm.nih.gov/gene/?term=29244
Tlr12	protein_coding	chr5:146791705-146795917	-	49	27	82	195	140	121	1.61612	2.1388	5.3578e-06	0.000195928	toll-like receptor 12	http://www.ncbi.nlm.nih.gov/gene/?term=362604
Chaf1b	protein_coding	chr11:34101255-34121371	+	28	21	32	110	69	58	1.61277	1.21087	3.55853e-06	0.000138587	chromatin assembly factor 1 subunit B	http://www.ncbi.nlm.nih.gov/gene/?term=288242
Exo1	protein_coding	chr13:93936989-93962749	+	33	11	14	82	50	39	1.60873	0.758301	0.000561019	0.00979329	exonuclease 1	http://www.ncbi.nlm.nih.gov/gene/?term=305000
Pkib	protein_coding	chr20:40616943-40712598	+	212	176	259	819	440	635	1.60664	4.15738	2.7541e-14	6.24298e-12	protein kinase (cAMP-dependent, catalytic) inhibitor beta	http://www.ncbi.nlm.nih.gov/gene/?term=24678
Fxyd3	protein_coding	chr1:89502561-89509449	-	140	103	160	548	242	399	1.60582	3.47847	4.96186e-10	4.79812e-08	FXYD domain-containing ion transport regulator 3	http://www.ncbi.nlm.nih.gov/gene/?term=116831
Nipsnap3b	protein_coding	chr5:69833208-69849116	+	99	89	147	406	272	289	1.60407	3.20832	5.55198e-11	6.4582e-09	nipsnap homolog 3B (C. elegans)	http://www.ncbi.nlm.nih.gov/gene/?term=313211
Tmem173	protein_coding	chr18:28529576-28535828	-	198	226	251	1012	434	545	1.59974	4.21666	3.09551e-11	3.81406e-09	transmembrane protein 173	http://www.ncbi.nlm.nih.gov/gene/?term=498840
Atp6v1b2	protein_coding	chr16:22326537-22350143	-	1083	1038	1227	4453	2130	3241	1.59884	6.52157	5.97474e-18	2.57657e-15	ATPase H+ transporting V1 subunit B2	http://www.ncbi.nlm.nih.gov/gene/?term=117596
Meis3	protein_coding	chr1:78068337-78079698	+	142	153	182	561	335	477	1.58651	3.70703	3.7036e-14	8.28903e-12	Meis homeobox 3	http://www.ncbi.nlm.nih.gov/gene/?term=361514
Xcr1	protein_coding	chr8:132911474-132919110	-	47	33	67	198	100	126	1.58539	2.02251	5.78483e-07	2.84116e-05	X-C motif chemokine receptor 1	http://www.ncbi.nlm.nih.gov/gene/?term=301086
Hist1h2an	protein_coding	chr17:43779174-43779775	+	170	92	179	420	365	461	1.58514	3.59009	4.39841e-10	4.32046e-08	histone cluster 1, H2an	http://www.ncbi.nlm.nih.gov/gene/?term=306970
Gjb1	protein_coding	chrX:71271994-71279973	+	286	165	293	969	425	770	1.58482	4.34229	5.79461e-10	5.53809e-08	gap junction protein, beta 1	http://www.ncbi.nlm.nih.gov/gene/?term=29584
Brms1l	protein_coding	chr6:76745979-76753951	+	8	5	5	22	9	22	1.58401	-0.788367	0.00396598	0.0475085	breast cancer metastasis-suppressor 1-like	http://www.ncbi.nlm.nih.gov/gene/?term=299053
Cdca8	protein_coding	chr5:142911310-142933536	-	40	32	31	137	62	101	1.58083	1.53218	1.22746e-06	5.51531e-05	cell division cycle associated 8	http://www.ncbi.nlm.nih.gov/gene/?term=500545
Cenpf	protein_coding	chr13:108132499-108178609	-	185	172	219	712	420	517	1.57853	3.97161	5.94687e-15	1.49144e-12	centromere protein F	http://www.ncbi.nlm.nih.gov/gene/?term=257649
Adra2a	protein_coding	chr1:274766283-274769083	+	33	43	48	187	83	89	1.5759	1.78307	3.54917e-06	0.000138375	adrenoceptor alpha 2A	http://www.ncbi.nlm.nih.gov/gene/?term=25083
E2f8	protein_coding	chr1:104185436-104203684	-	19	15	13	47	45	41	1.57575	0.441247	3.88201e-05	0.00106086	E2F transcription factor 8	http://www.ncbi.nlm.nih.gov/gene/?term=308607
Idi1	protein_coding	chr17:57976266-57984036	-	257	263	317	1509	364	612	1.57468	4.50724	1.56447e-06	6.82155e-05	isopentenyl-diphosphate delta isomerase 1	http://www.ncbi.nlm.nih.gov/gene/?term=89784
Hist1h2ah	protein_coding	chr17:43632336-43633313	+	308	180	305	840	730	649	1.57386	4.42633	3.11923e-12	4.94628e-10	histone cluster 1, H2ah	http://www.ncbi.nlm.nih.gov/gene/?term=502125
Stil	protein_coding	chr5:133812584-133851362	+	54	48	60	180	140	137	1.57251	2.15643	2.89019e-09	2.3549e-07	Scl/Tal1 interrupting locus	http://www.ncbi.nlm.nih.gov/gene/?term=313506
LOC102548671	lncRNA	chr3:30086361-30134543	+	9	7	6	20	16	27	1.57188	-0.55423	0.00148096	0.0216672	uncharacterized LOC102548671	http://www.ncbi.nlm.nih.gov/gene/?term=102548671
Scn2b	protein_coding	chr8:49419003-49431110	+	50	21	81	156	127	140	1.57119	2.0488	2.71017e-05	0.000776637	sodium voltage-gated channel beta subunit 2	http://www.ncbi.nlm.nih.gov/gene/?term=25349
Cdca5	protein_coding	chr1:221448661-221462235	+	24	14	33	80	52	69	1.57009	0.992681	9.67914e-06	0.000325665	cell division cycle associated 5	http://www.ncbi.nlm.nih.gov/gene/?term=684771
Hist1h2ai	protein_coding	chr17:44794114-44794563	+	215	124	283	693	518	529	1.56957	4.06674	4.15238e-10	4.13624e-08	histone cluster 1, H2ai-like1	http://www.ncbi.nlm.nih.gov/gene/?term=291159
Cyba	protein_coding	chr19:55249634-55257824	-	249	173	343	828	559	766	1.56902	4.36461	2.28821e-12	3.7461e-10	cytochrome b-245 alpha chain	http://www.ncbi.nlm.nih.gov/gene/?term=79129
LOC100910366	pseudogene	chr17:43791589-43802084	+	822	620	1121	2714	2302	2093	1.56587	6.10352	8.08883e-15	1.97267e-12	uncharacterized LOC100910366	http://www.ncbi.nlm.nih.gov/gene/?term=100910366
LOC100911413	protein_coding	chr1:203258772-203352437	+	145	90	264	526	558	269	1.56557	3.73776	1.67241e-05	0.000512922	deleted in malignant brain tumors 1 protein-like	http://www.ncbi.nlm.nih.gov/gene/?term=100911413
Cstb	protein_coding	chr20:10966357-10968399	-	363	254	484	1356	717	1051	1.56508	4.88606	2.024e-12	3.37606e-10	cystatin B	http://www.ncbi.nlm.nih.gov/gene/?term=25308
Gja1	protein_coding	chr20:37876589-37889097	+	798	790	997	3634	1459	2357	1.56412	6.12073	2.71801e-13	5.2236e-11	gap junction protein, alpha 1	http://www.ncbi.nlm.nih.gov/gene/?term=24392
Acta1	protein_coding	chr19:56674072-56677084	-	8	7	26	47	29	39	1.56221	0.230316	0.00122129	0.0185751	actin, alpha 1, skeletal muscle	http://www.ncbi.nlm.nih.gov/gene/?term=29437
Mmp14	protein_coding	chr15:33074441-33083666	+	1212	1066	1443	4145	2874	3403	1.55864	6.64127	1.13775e-22	1.08738e-19	matrix metallopeptidase 14	http://www.ncbi.nlm.nih.gov/gene/?term=81707
Mzb1	protein_coding	chr18:28436546-28438607	-	227	146	177	701	383	480	1.55834	3.89602	2.39747e-11	3.06063e-09	marginal zone B and B1 cell-specific protein	http://www.ncbi.nlm.nih.gov/gene/?term=291675
Abca6	protein_coding	chr10:98477716-98546692	-	147	86	119	408	193	403	1.55559	3.25332	4.1638e-08	2.65777e-06	ATP binding cassette subfamily A member 6	http://www.ncbi.nlm.nih.gov/gene/?term=303639
Hist1h4a	NA	chr17:43617161-43617705	+	412	239	525	1294	977	980	1.55316	4.97088	2.69012e-11	3.3703e-09	histone cluster 1, H3f	http://www.ncbi.nlm.nih.gov/gene/?term=364716
Fxyd2	protein_coding	chr8:49710328-49717492	+	182	140	263	711	470	446	1.55253	3.9671	1.16666e-10	1.29327e-08	FXYD domain-containing ion transport regulator 2	http://www.ncbi.nlm.nih.gov/gene/?term=29639
Prr16	protein_coding	chr18:45946130-46151627	+	20	10	17	59	46	26	1.55253	0.420131	0.000451991	0.00820673	proline rich 16	http://www.ncbi.nlm.nih.gov/gene/?term=361327
Sctr	protein_coding	chr13:36039241-36090515	+	25	24	11	63	74	28	1.55223	0.759479	0.00168036	0.0240473	secretin receptor	http://www.ncbi.nlm.nih.gov/gene/?term=81779
Slc16a6	protein_coding	chr10:97733701-97758734	-	369	491	645	2075	852	1354	1.55112	5.32746	6.82435e-11	7.8098e-09	solute carrier family 16, member 6	http://www.ncbi.nlm.nih.gov/gene/?term=303772
Trat1	protein_coding	chr11:54619169-54661284	+	68	30	67	238	134	90	1.54647	2.16047	5.86492e-05	0.00147952	T cell receptor associated transmembrane adaptor 1	http://www.ncbi.nlm.nih.gov/gene/?term=498075
Fgg	protein_coding	chr2:181987080-181994523	+	2898	1980	2878	11556	3153	7674	1.54435	7.69134	6.34041e-08	3.85903e-06	fibrinogen gamma chain	http://www.ncbi.nlm.nih.gov/gene/?term=24367
RGD1565166	protein_coding	chr10:10555337-10564433	+	219	130	222	714	394	488	1.54096	3.92999	1.30583e-10	1.43853e-08	similar to MGC45438 protein	http://www.ncbi.nlm.nih.gov/gene/?term=287059
Clec4a3	protein_coding	chr4:155913005-155923288	-	167	109	289	689	416	449	1.53687	3.89872	8.54159e-08	5.06792e-06	C-type lectin domain family 4, member A3	http://www.ncbi.nlm.nih.gov/gene/?term=362431
Fignl1	protein_coding	chr14:91895902-91904474	-	14	27	22	63	38	75	1.53653	0.813982	5.637e-05	0.0014351	fidgetin-like 1	http://www.ncbi.nlm.nih.gov/gene/?term=289777
Gabrr2	protein_coding	chr5:48298100-48341695	+	34	49	55	204	72	114	1.52962	1.90048	1.14206e-05	0.000375668	gamma-aminobutyric acid type A receptor rho 2 subunit	http://www.ncbi.nlm.nih.gov/gene/?term=29695
Tnfaip2	protein_coding	chr6:135890874-135903647	+	672	470	887	2224	1381	1973	1.5294	5.73975	7.49474e-14	1.56822e-11	TNF alpha induced protein 2	http://www.ncbi.nlm.nih.gov/gene/?term=299339
Myo5a	protein_coding	chr8:82038966-82156507	+	1779	1432	1793	5997	3271	4648	1.52903	7.04954	9.1815e-19	4.44762e-16	myosin VA	http://www.ncbi.nlm.nih.gov/gene/?term=25017
LOC100360977	protein_coding	chr14:22706906-22707637	+	12	12	12	47	28	25	1.52627	0.0511647	0.000366491	0.0068756	TRIMCyp-like	http://www.ncbi.nlm.nih.gov/gene/?term=100360977
Cd83	protein_coding	chr17:24416651-24435790	+	375	301	599	1422	921	1138	1.52602	5.0649	2.26186e-12	3.73136e-10	CD83 molecule	http://www.ncbi.nlm.nih.gov/gene/?term=361226
LOC100360053	pseudogene	chr17:43689429-43690002	+	65	17	69	152	139	115	1.52538	2.0112	0.000194159	0.00403636	histone cluster 1, H2ae-like	http://www.ncbi.nlm.nih.gov/gene/?term=100360053
Rnaset2	protein_coding	chr1:53174879-53192048	+	2074	1251	1995	6530	3272	4977	1.52423	7.13206	3.84955e-13	7.12712e-11	ribonuclease T2	http://www.ncbi.nlm.nih.gov/gene/?term=292306
LOC684762	protein_coding	chr17:43775998-43776779	-	382	205	363	1003	762	821	1.52353	4.64891	5.15678e-12	7.72687e-10	similar to CG31613-PA	http://www.ncbi.nlm.nih.gov/gene/?term=684762
Polq	protein_coding	chr11:66585860-66695376	-	29	40	54	153	73	115	1.52307	1.72842	2.09413e-06	8.77401e-05	DNA polymerase theta	http://www.ncbi.nlm.nih.gov/gene/?term=288079
Hk2	protein_coding	chr4:113559396-113609897	-	381	309	411	1215	833	963	1.52185	4.86131	5.35863e-18	2.33941e-15	hexokinase 2	http://www.ncbi.nlm.nih.gov/gene/?term=25059
Kif2c	protein_coding	chr5:136027923-136053259	-	23	21	30	99	48	58	1.51935	1.01988	1.47628e-05	0.00046528	kinesin family member 2C	http://www.ncbi.nlm.nih.gov/gene/?term=171529
Ms4a6a	protein_coding	chr1:227919284-227932637	-	98	74	100	321	217	204	1.51704	2.85297	2.46921e-09	2.06013e-07	membrane-spanning 4-domains, subfamily A, member 6B	http://www.ncbi.nlm.nih.gov/gene/?term=293750
Cenpa	protein_coding	chr6:27072262-27080861	-	24	47	47	145	96	81	1.51672	1.6672	9.92483e-06	0.000333297	centromere protein A	http://www.ncbi.nlm.nih.gov/gene/?term=298850
Ccl4	protein_coding	chr10:70871005-70886357	+	81	61	72	302	95	206	1.51547	2.51627	4.69438e-06	0.000175479	C-C motif chemokine ligand 4	http://www.ncbi.nlm.nih.gov/gene/?term=116637
Ptafr	protein_coding	chr5:150746294-150775675	+	625	500	719	2045	1443	1508	1.51289	5.59532	8.30356e-18	3.41431e-15	platelet-activating factor receptor	http://www.ncbi.nlm.nih.gov/gene/?term=58949
Cd163l1	protein_coding	chr1:212695567-212706986	+	56	106	87	188	332	120	1.50632	2.71603	0.0002602	0.00516539	CD163 molecule-like 1	http://www.ncbi.nlm.nih.gov/gene/?term=293591
Adamts3	protein_coding	chr14:19866408-20072886	+	47	72	56	110	202	143	1.50471	2.21655	2.59083e-05	0.000750342	ADAM metallopeptidase with thrombospondin type 1, motif 3	http://www.ncbi.nlm.nih.gov/gene/?term=305253
Rarres1	protein_coding	chr2:164650722-164684982	-	76	83	133	245	307	209	1.50292	2.93359	5.70792e-07	2.80728e-05	retinoic acid receptor responder 1	http://www.ncbi.nlm.nih.gov/gene/?term=310486
Nuf2	protein_coding	chr13:87818456-87847223	-	14	14	8	45	25	29	1.50166	0.0412799	0.000517938	0.00913939	NUF2, NDC80 kinetochore complex component	http://www.ncbi.nlm.nih.gov/gene/?term=304951
RT1-Ba	protein_coding	chr20:4066133-4070726	-	61	180	111	350	322	266	1.49822	3.21351	8.7021e-06	0.000294754	RT1 class II, locus Ba	http://www.ncbi.nlm.nih.gov/gene/?term=309621
Trip13	protein_coding	chr1:31967980-32012923	+	36	34	69	157	94	123	1.4982	1.87615	2.16603e-06	9.00062e-05	thyroid hormone receptor interactor 13	http://www.ncbi.nlm.nih.gov/gene/?term=292206
Lbp	protein_coding	chr3:154786232-154812910	+	658	701	760	2170	1564	1943	1.49302	5.78468	1.16372e-21	9.1448e-19	lipopolysaccharide binding protein	http://www.ncbi.nlm.nih.gov/gene/?term=29469
Bpifa5	protein_coding	chr3:149643481-149649398	+	63	50	115	277	166	166	1.49145	2.57014	2.14127e-06	8.90819e-05	BPI fold containing family A, member 5	http://www.ncbi.nlm.nih.gov/gene/?term=311559
Trim46	protein_coding	chr2:188548608-188561384	-	32	28	30	108	57	79	1.48879	1.27375	2.65905e-06	0.000107585	tripartite motif-containing 46	http://www.ncbi.nlm.nih.gov/gene/?term=310641
Cd14	protein_coding	chr18:29560341-29562294	-	663	480	808	1971	1602	1577	1.48794	5.65533	6.33242e-15	1.57695e-12	CD14 molecule	http://www.ncbi.nlm.nih.gov/gene/?term=60350
Aspm	protein_coding	chr13:56546021-56591793	+	327	267	338	1066	651	787	1.48765	4.59744	8.48295e-16	2.49978e-13	abnormal spindle microtubule assembly	http://www.ncbi.nlm.nih.gov/gene/?term=289054
Ercc6l	protein_coding	chrX:72018373-72034140	-	41	49	49	173	91	112	1.48668	1.88046	4.00206e-07	2.03334e-05	ERCC excision repair 6 like, spindle assembly checkpoint helicase	http://www.ncbi.nlm.nih.gov/gene/?term=317252
Dtl	protein_coding	chr13:110219276-110257338	-	27	13	28	56	64	58	1.48569	0.871803	9.5895e-05	0.00225318	denticleless E3 ubiquitin protein ligase homolog	http://www.ncbi.nlm.nih.gov/gene/?term=305073
Mmp9	protein_coding	chr3:161413410-161421473	+	217	81	227	441	592	308	1.48518	3.76086	4.90633e-05	0.00127933	matrix metallopeptidase 9	http://www.ncbi.nlm.nih.gov/gene/?term=81687
Pax8	protein_coding	chr3:1527316-1586023	-	41	20	33	110	69	73	1.48373	1.32835	1.56721e-05	0.00048857	paired box 8	http://www.ncbi.nlm.nih.gov/gene/?term=81819
Oip5	misc_RNA	chr3:111413662-111422319	-	16	14	10	49	23	37	1.48301	0.168561	0.000450005	0.00818153	Opa interacting protein 5	http://www.ncbi.nlm.nih.gov/gene/?term=499873
Slc16a11	protein_coding	chr10:56822756-56826480	+	643	976	1056	3671	1625	1960	1.48268	6.1092	2.72164e-10	2.79775e-08	solute carrier family 16, member 11	http://www.ncbi.nlm.nih.gov/gene/?term=287450
Ube2t	protein_coding	chr13:51790877-51801379	+	15	10	14	52	30	23	1.4817	0.125834	0.000920989	0.0147777	ubiquitin-conjugating enzyme E2T	http://www.ncbi.nlm.nih.gov/gene/?term=360847
RT1-Bb	protein_coding	chr20:4043726-4049367	+	1076	1204	1240	3808	2605	2958	1.48056	6.50769	3.50304e-21	2.58072e-18	RT1 class II, locus Bb	http://www.ncbi.nlm.nih.gov/gene/?term=309622
Troap	protein_coding	chr7:140758584-140766423	+	12	26	26	74	39	59	1.47899	0.791895	0.000107971	0.00247284	trophinin associated protein	http://www.ncbi.nlm.nih.gov/gene/?term=300219
LOC684773	protein_coding	chr17:43777212-43777826	-	98	54	84	231	193	198	1.47871	2.62299	6.42881e-08	3.89941e-06	similar to histone 2a	http://www.ncbi.nlm.nih.gov/gene/?term=684773
Vmp1	protein_coding	chr10:73901988-74001895	-	919	1332	1634	4212	2854	3183	1.4744	6.63787	2.20564e-14	5.06466e-12	vacuole membrane protein 1	http://www.ncbi.nlm.nih.gov/gene/?term=192129
Fam3d	protein_coding	chr15:18321757-18357252	+	88	120	75	414	147	216	1.47391	2.89131	6.4788e-06	0.000229793	family with sequence similarity 3, member D	http://www.ncbi.nlm.nih.gov/gene/?term=289949
Osm	protein_coding	chr14:84457487-84469426	+	150	160	183	564	226	544	1.47379	3.67293	3.68337e-08	2.37252e-06	oncostatin M	http://www.ncbi.nlm.nih.gov/gene/?term=289747
LOC102550328	lncRNA	chr20:46942789-46948942	+	17	13	15	49	24	48	1.47177	0.313127	0.000260882	0.00517114	uncharacterized LOC102550328	http://www.ncbi.nlm.nih.gov/gene/?term=102550328
Scd	protein_coding	chr1:264059374-264072433	+	20597	15633	22265	74327	32114	51213	1.47153	10.5508	9.40169e-13	1.64585e-10	stearoyl-Coenzyme A desaturase 2	http://www.ncbi.nlm.nih.gov/gene/?term=83792
Vnn3	protein_coding	chr1:22649114-22661376	-	33	30	43	125	83	72	1.47062	1.48267	3.65494e-06	0.000141562	vanin 3	http://www.ncbi.nlm.nih.gov/gene/?term=498992
Mpeg1	protein_coding	chr1:228724559-228729054	+	5012	3638	5572	16118	9679	11886	1.46983	8.50829	2.40073e-16	7.78851e-14	macrophage expressed 1	http://www.ncbi.nlm.nih.gov/gene/?term=64552
LOC296111	pseudogene	chr3:115229596-115235522	-	38	38	34	141	75	78	1.46643	1.54042	4.83122e-06	0.000180023	similar to Elongation factor 2 (EF-2)	http://www.ncbi.nlm.nih.gov/gene/?term=296111
Gabrp	protein_coding	chr10:18484257-18510606	-	58	60	108	199	271	96	1.46459	2.53477	0.000293612	0.00572971	gamma-aminobutyric acid type A receptor pi subunit	http://www.ncbi.nlm.nih.gov/gene/?term=81658
Hmmr	protein_coding	chr10:25861490-25890639	-	16	6	21	45	29	39	1.46082	0.23302	0.000724626	0.0120983	hyaluronan-mediated motility receptor	http://www.ncbi.nlm.nih.gov/gene/?term=25460
Cd200r1	protein_coding	chr11:60848161-60882466	-	94	119	155	377	277	302	1.45572	3.23543	5.42304e-10	5.19701e-08	CD200 receptor 1	http://www.ncbi.nlm.nih.gov/gene/?term=64357
Tigit	protein_coding	chr11:61970617-61987749	+	10	24	10	47	28	42	1.45515	0.278155	0.00111103	0.017175	T cell immunoreceptor with Ig and ITIM domains	http://www.ncbi.nlm.nih.gov/gene/?term=363784
LOC680907	NA	chr1:212714092-212810823	+	41	48	49	102	173	69	1.45474	1.83804	0.000316883	0.00609664	similar to scavenger receptor cysteine-rich type 1 protein M160 precursor	http://www.ncbi.nlm.nih.gov/gene/?term=680907
Slc7a7	protein_coding	chr15:33013353-33059739	-	359	399	461	1475	643	1120	1.45122	4.95575	7.17955e-12	1.04479e-09	solute carrier family 7 member 7	http://www.ncbi.nlm.nih.gov/gene/?term=83509
Tmprss4	protein_coding	chr8:49469804-49503306	-	44	85	63	256	109	147	1.44948	2.31506	1.27797e-05	0.000412333	transmembrane protease, serine 4	http://www.ncbi.nlm.nih.gov/gene/?term=367074
Cyp51	protein_coding	chr4:27175564-27194018	+	931	1042	1279	4810	1575	2337	1.44741	6.36472	2.1414e-08	1.43689e-06	cytochrome P450, family 51	http://www.ncbi.nlm.nih.gov/gene/?term=25427
Slco4a1	protein_coding	chr3:175838994-175857985	+	70	53	74	241	152	120	1.44649	2.34196	1.40045e-06	6.16723e-05	solute carrier organic anion transporter family, member 4a1	http://www.ncbi.nlm.nih.gov/gene/?term=171144
Mki67	protein_coding	chr1:207993895-208020454	-	725	980	1071	3190	1808	2253	1.44393	6.13501	9.25918e-15	2.22737e-12	marker of proliferation Ki-67	http://www.ncbi.nlm.nih.gov/gene/?term=291234
Dpp7	protein_coding	chr3:2569135-2573387	-	606	453	583	1737	1055	1478	1.43889	5.37755	7.70596e-16	2.2899e-13	dipeptidylpeptidase 7	http://www.ncbi.nlm.nih.gov/gene/?term=83799
Npc2	protein_coding	chr6:108467410-108488330	-	6856	5948	7785	24247	10615	19269	1.43645	9.0193	4.62145e-13	8.42391e-11	NPC intracellular cholesterol transporter 2	http://www.ncbi.nlm.nih.gov/gene/?term=286898
Tk1	protein_coding	chr10:106817556-106828884	-	115	125	149	402	270	331	1.43539	3.30371	3.19631e-11	3.92458e-09	thymidine kinase 1	http://www.ncbi.nlm.nih.gov/gene/?term=24834
Trim72	protein_coding	chr1:199450042-199457902	+	43	32	49	177	73	76	1.43346	1.67994	7.01819e-05	0.00172585	tripartite motif containing 72	http://www.ncbi.nlm.nih.gov/gene/?term=365377
Cd86	protein_coding	chr11:67060302-67118455	+	121	101	191	457	270	335	1.43185	3.37868	1.77134e-08	1.2282e-06	CD86 molecule	http://www.ncbi.nlm.nih.gov/gene/?term=56822
Itgax	protein_coding	chr1:199555563-199576948	+	599	577	992	2074	1653	1764	1.43085	5.76083	3.36057e-13	6.35489e-11	integrin subunit alpha D	http://www.ncbi.nlm.nih.gov/gene/?term=64350
Slc6a14	protein_coding	chrX:120624523-120647964	+	2967	1670	2383	9806	2725	6232	1.43065	7.46722	1.37334e-06	6.06293e-05	solute carrier family 6 member 14	http://www.ncbi.nlm.nih.gov/gene/?term=298340
P2ry2	protein_coding	chr1:166031228-166045423	-	434	394	495	1585	716	1152	1.42765	5.05656	2.90717e-12	4.67287e-10	purinergic receptor P2Y2	http://www.ncbi.nlm.nih.gov/gene/?term=29597
Cotl1	protein_coding	chr19:52465074-52499433	-	727	583	881	2119	1735	1668	1.42047	5.7746	2.68018e-15	7.12606e-13	coactosin-like F-actin binding protein 1	http://www.ncbi.nlm.nih.gov/gene/?term=361422
Cma1	protein_coding	chr15:34601037-34603819	-	57	12	37	65	105	91	1.41834	1.4411	0.00293316	0.0375534	chymase 1	http://www.ncbi.nlm.nih.gov/gene/?term=25627
Hist2h2ac	protein_coding	chr2:198360273-198360792	-	57	37	88	155	182	110	1.41673	2.19423	6.92873e-05	0.0017086	histone cluster 2, H2ac	http://www.ncbi.nlm.nih.gov/gene/?term=499675
Fat2	protein_coding	chr10:40583025-40682598	-	47	14	21	122	35	61	1.41658	1.10794	0.00420234	0.0496835	FAT atypical cadherin 2	http://www.ncbi.nlm.nih.gov/gene/?term=65048
C1qb	protein_coding	chr5:155246444-155251995	-	452	317	520	1280	893	1093	1.41585	5.00707	1.17337e-13	2.38464e-11	complement C1q B chain	http://www.ncbi.nlm.nih.gov/gene/?term=29687
Fam20c	protein_coding	chr12:17913771-17972733	-	486	415	501	1457	1057	1037	1.41431	5.13216	1.05423e-15	3.00642e-13	FAM20C, golgi associated secretory pathway kinase	http://www.ncbi.nlm.nih.gov/gene/?term=304334
Ncf1	protein_coding	chr12:25497104-25506300	+	1353	941	1752	3923	2757	3514	1.41169	6.64833	2.81608e-13	5.35388e-11	neutrophil cytosolic factor 1	http://www.ncbi.nlm.nih.gov/gene/?term=114553
Cdc20	protein_coding	chr5:137260728-137264931	-	50	29	61	140	95	119	1.41105	1.82817	4.10017e-06	0.000155904	cell division cycle 20	http://www.ncbi.nlm.nih.gov/gene/?term=64515
Mcm6	protein_coding	chr13:45042882-45068073	-	73	91	109	274	223	186	1.40732	2.77582	6.73345e-08	4.06328e-06	minichromosome maintenance complex component 6	http://www.ncbi.nlm.nih.gov/gene/?term=29685
Ccna2	protein_coding	chr2:123275463-123282265	-	57	65	105	191	186	185	1.40661	2.50605	5.02059e-07	2.50753e-05	cyclin A2	http://www.ncbi.nlm.nih.gov/gene/?term=114494
LOC100360950	protein_coding	chr17:44815638-44816042	-	406	166	468	1030	773	789	1.40399	4.68373	6.64021e-07	3.18604e-05	GF20391-like	http://www.ncbi.nlm.nih.gov/gene/?term=100360950
Nnmt	protein_coding	chr8:52918437-52938189	-	87	72	110	336	139	215	1.40124	2.75069	1.14891e-06	5.22878e-05	nicotinamide N-methyltransferase	http://www.ncbi.nlm.nih.gov/gene/?term=300691
Apoe	protein_coding	chr1:80612894-80616820	-	9276	4919	9068	16684	18437	22128	1.40076	9.16751	1.32904e-09	1.16043e-07	apolipoprotein E	http://www.ncbi.nlm.nih.gov/gene/?term=25728
LOC102549532	lncRNA	chr1:127090449-127096094	+	16	7	9	33	23	25	1.39643	-0.18948	0.00234868	0.0314242	uncharacterized LOC102549532	http://www.ncbi.nlm.nih.gov/gene/?term=102549532
Lhfpl2	protein_coding	chr2:23770708-23852021	+	401	439	404	1385	642	1145	1.39023	4.94646	1.34388e-11	1.83484e-09	lipoma HMGIC fusion partner-like 2	http://www.ncbi.nlm.nih.gov/gene/?term=294643
Car8	protein_coding	chr5:21249018-21345810	-	475	376	574	1759	672	1209	1.38984	5.13291	4.41927e-09	3.43459e-07	carbonic anhydrase 8	http://www.ncbi.nlm.nih.gov/gene/?term=297814
Aif1	protein_coding	chr20:5161350-5167180	-	159	100	213	510	315	351	1.38891	3.53959	9.80961e-08	5.74317e-06	allograft inflammatory factor 1	http://www.ncbi.nlm.nih.gov/gene/?term=29427
Lipg	protein_coding	chr18:70903528-70924434	-	19	21	20	67	46	37	1.38581	0.640814	0.000159378	0.0034328	lipase G, endothelial type	http://www.ncbi.nlm.nih.gov/gene/?term=291437
Sqle	protein_coding	chr7:99609929-99624803	+	396	522	501	2254	679	737	1.38256	5.12828	1.31097e-05	0.000420675	squalene epoxidase	http://www.ncbi.nlm.nih.gov/gene/?term=29230
Layn	protein_coding	chr8:55447203-55468565	-	152	143	178	585	284	323	1.38181	3.54585	1.66501e-08	1.1636e-06	layilin	http://www.ncbi.nlm.nih.gov/gene/?term=500996
Muc1	protein_coding	chr2:188542691-188547874	+	2129	2589	2488	8954	3407	5989	1.37746	7.46655	2.44185e-10	2.53966e-08	mucin 1, cell surface associated	http://www.ncbi.nlm.nih.gov/gene/?term=24571
Tmsb10	protein_coding	chr4:100882216-100883294	-	811	600	1122	2302	1915	1947	1.3752	5.94599	5.47378e-12	8.09891e-10	thymosin, beta 10	http://www.ncbi.nlm.nih.gov/gene/?term=50665
Plbd1	protein_coding	chr4:170564387-170620681	-	167	112	172	531	261	337	1.37385	3.4711	5.27866e-08	3.29795e-06	phospholipase B domain containing 1	http://www.ncbi.nlm.nih.gov/gene/?term=297694
Arhgap11a	protein_coding	chr3:105281827-105298108	-	227	167	241	602	381	590	1.37329	3.96125	6.5511e-11	7.54593e-09	Rho GTPase activating protein 11A	http://www.ncbi.nlm.nih.gov/gene/?term=296060
Tnfsf9	protein_coding	chr9:9909942-9912276	-	26	17	21	76	46	37	1.36964	0.719183	0.000374718	0.00702213	tumor necrosis factor superfamily member 9	http://www.ncbi.nlm.nih.gov/gene/?term=353218
C1qc	protein_coding	chr5:155255013-155258631	-	677	377	723	1681	1215	1447	1.36712	5.43333	1.2498e-10	1.38111e-08	complement C1q C chain	http://www.ncbi.nlm.nih.gov/gene/?term=362634
Cspg5	protein_coding	chr8:118333695-118348040	+	28	11	21	67	32	51	1.36681	0.630011	0.000826246	0.013483	chondroitin sulfate proteoglycan 5	http://www.ncbi.nlm.nih.gov/gene/?term=50568
LOC100361025	misc_RNA	chr14:93040967-93042219	-	15	24	40	76	60	56	1.36661	0.992202	0.000270375	0.00533539	protein arginine methyltransferase 1-like	http://www.ncbi.nlm.nih.gov/gene/?term=100361025
LOC100360145	pseudogene	chr16:71438518-71439599	+	532	289	632	1531	942	1093	1.36608	5.13964	7.86569e-09	5.88048e-07	H2A histone family, member Z-like	http://www.ncbi.nlm.nih.gov/gene/?term=100360145
Entpd3	protein_coding	chr8:129201000-129232436	+	138	150	156	545	210	363	1.36456	3.44607	2.16939e-07	1.18021e-05	ectonucleoside triphosphate diphosphohydrolase 3	http://www.ncbi.nlm.nih.gov/gene/?term=316077
LOC100362384	misc_RNA	chr13:89253406-89254334	+	63	65	58	199	129	131	1.36414	2.20747	4.23473e-07	2.14233e-05	ferritin light chain 1-like	http://www.ncbi.nlm.nih.gov/gene/?term=100362384
Micall2	protein_coding	chr12:16988016-17016794	+	103	96	111	314	220	226	1.36388	2.93003	4.01102e-09	3.1731e-07	MICAL-like 2	http://www.ncbi.nlm.nih.gov/gene/?term=288515
Bard1	protein_coding	chr9:78297723-78368777	-	20	24	36	92	41	66	1.36385	1.01624	0.00016616	0.00353962	BRCA1 associated RING domain 1	http://www.ncbi.nlm.nih.gov/gene/?term=64557
Epha10	protein_coding	chr5:142875683-142910537	+	29	12	16	78	24	43	1.36201	0.567792	0.00343788	0.0425071	EPH receptor A10	http://www.ncbi.nlm.nih.gov/gene/?term=298528
Tfec	protein_coding	chr4:44063533-44136815	-	98	58	98	254	170	198	1.3615	2.6413	3.6711e-07	1.87869e-05	transcription factor EC	http://www.ncbi.nlm.nih.gov/gene/?term=26296
Ccr4	protein_coding	chr8:122530178-122535959	-	44	24	48	97	102	79	1.36052	1.52712	6.43127e-05	0.00159931	C-C motif chemokine receptor 4	http://www.ncbi.nlm.nih.gov/gene/?term=171054
Rgs10	protein_coding	chr1:199782076-199823439	-	102	79	148	313	241	242	1.35982	3.00286	1.26888e-07	7.25266e-06	regulator of G-protein signaling 10	http://www.ncbi.nlm.nih.gov/gene/?term=54290
Ptcd3	protein_coding	chr4:99795646-99830783	-	284	341	358	904	717	765	1.35798	4.58041	1.94113e-14	4.51593e-12	Pentatricopeptide repeat domain 3	http://www.ncbi.nlm.nih.gov/gene/?term=500199
Akr1b8	protein_coding	chr4:61772064-61784637	+	486	384	522	1586	811	1043	1.35684	5.0783	8.30528e-12	1.18424e-09	aldo-keto reductase family 1, member B8	http://www.ncbi.nlm.nih.gov/gene/?term=286921
Ifi27l2b	protein_coding	chr6:127336305-127337791	-	107	90	137	367	215	236	1.35608	3.02607	5.19818e-08	3.25918e-06	interferon, alpha-inducible protein 27 like 2B	http://www.ncbi.nlm.nih.gov/gene/?term=299269
Bex4	protein_coding	chrX_KL568122v1_random:30532-31123	+	30	25	40	83	54	95	1.35444	1.2475	4.01909e-05	0.00109074	brain expressed, X-linked 4	http://www.ncbi.nlm.nih.gov/gene/?term=501624
Stmn2	protein_coding	chr2:95424251-95471900	-	47	13	21	59	73	62	1.35436	1.03119	0.00283152	0.0364679	stathmin 2	http://www.ncbi.nlm.nih.gov/gene/?term=84510
Ccne1	protein_coding	chr1:94485830-94495105	-	31	10	20	60	49	39	1.35338	0.63906	0.00146468	0.0214557	cyclin E1	http://www.ncbi.nlm.nih.gov/gene/?term=25729
Ctsb	protein_coding	chr15:46316741-46337613	+	17080	10795	16371	46966	24261	37761	1.35194	10.0622	1.43858e-11	1.94165e-09	cathepsin B	http://www.ncbi.nlm.nih.gov/gene/?term=64529
Epsti1	protein_coding	chr15:60084966-60190360	+	161	141	214	477	382	382	1.35072	3.64409	4.33773e-10	4.28238e-08	epithelial stromal interaction 1 (breast)	http://www.ncbi.nlm.nih.gov/gene/?term=498547
Esco2	protein_coding	chr15:42501379-42518925	-	22	22	36	106	42	50	1.34874	1.00705	0.000601857	0.0103617	establishment of cohesion 1 homolog 2 (S. cerevisiae), pseudogene 2	http://www.ncbi.nlm.nih.gov/gene/?term=290404
Csf2rb	protein_coding	chr7:119554383-119568248	+	550	546	676	1690	1244	1342	1.34713	5.41851	2.19712e-16	7.19394e-14	colony stimulating factor 2 receptor beta common subunit	http://www.ncbi.nlm.nih.gov/gene/?term=171081
Cit	protein_coding	chr12:46334669-46494155	-	25	26	22	54	64	56	1.34387	0.879924	0.000133144	0.00295188	citron rho-interacting serine/threonine kinase	http://www.ncbi.nlm.nih.gov/gene/?term=83620
Gpr68	protein_coding	chr6:124874151-124903949	-	68	44	72	170	122	152	1.3436	2.17027	8.72449e-07	4.0755e-05	G protein-coupled receptor 68	http://www.ncbi.nlm.nih.gov/gene/?term=314386
Grn	protein_coding	chr10:90377103-90383207	+	5480	3702	5315	14325	8821	12085	1.34344	8.44698	4.03874e-14	8.92612e-12	granulin	http://www.ncbi.nlm.nih.gov/gene/?term=29143
Dstnl1	protein_coding	chr20:844913-846592	+	12	11	36	38	42	59	1.34247	0.564156	0.0040554	0.0482853	destrin-like 1	http://www.ncbi.nlm.nih.gov/gene/?term=296197
LOC100910821	lncRNA	chr6:26387278-26389524	+	174	118	188	499	276	390	1.33756	3.53322	1.37695e-08	9.77742e-07	uncharacterized LOC100910821	http://www.ncbi.nlm.nih.gov/gene/?term=100910821
Sdsl	protein_coding	chr12:41636994-41647209	+	33	21	22	79	35	73	1.33661	0.938344	0.000410456	0.00759924	serine dehydratase-like	http://www.ncbi.nlm.nih.gov/gene/?term=360816
LOC690813	protein_coding	chr3:17107589-17109376	+	176	61	249	664	227	302	1.33619	3.53797	0.00107119	0.0167386	Ig kappa chain V-IV region-like	http://www.ncbi.nlm.nih.gov/gene/?term=690813
Erich3	protein_coding	chr2:260948453-261049973	+	481	665	613	2041	955	1316	1.33571	5.40376	1.49238e-10	1.60406e-08	glutamate-rich 3	http://www.ncbi.nlm.nih.gov/gene/?term=295528
Depdc1b	protein_coding	chr2:39980802-40069982	+	40	41	55	131	80	117	1.33369	1.73639	2.737e-06	0.000110234	DEP domain containing 1B	http://www.ncbi.nlm.nih.gov/gene/?term=310074
Adora1	protein_coding	chr13:51042246-51076856	-	31	44	46	164	57	78	1.33322	1.57824	0.000293761	0.00572971	adenosine A1 receptor	http://www.ncbi.nlm.nih.gov/gene/?term=29290
Il7	protein_coding	chr2:96427922-96474979	+	129	106	146	380	251	284	1.33269	3.20007	3.43228e-09	2.75221e-07	interleukin 7	http://www.ncbi.nlm.nih.gov/gene/?term=25647
LOC102555453	protein_coding	chrX:1345540-1346247	-	11	14	18	45	26	33	1.33185	0.151898	0.000751348	0.0124738	60S ribosomal protein L12-like	http://www.ncbi.nlm.nih.gov/gene/?term=102555453
Slc7a5	protein_coding	chr19:54693959-54722563	-	189	347	268	761	526	647	1.3316	4.27632	3.9661e-09	3.1446e-07	solute carrier family 7 member 5	http://www.ncbi.nlm.nih.gov/gene/?term=50719
Qsox1	protein_coding	chr13:73423396-73460890	-	282	239	389	773	588	803	1.33062	4.4427	2.56388e-11	3.22648e-09	quiescin sulfhydryl oxidase 1	http://www.ncbi.nlm.nih.gov/gene/?term=84491
LOC100912573	protein_coding	chr1:227757445-227769336	+	29	10	34	63	64	44	1.32985	0.856169	0.00206504	0.0283809	None	http://www.ncbi.nlm.nih.gov/gene/?term=LOC100912573
Phgdh	protein_coding	chr2:200484245-200513564	-	33	14	34	81	54	58	1.32219	1.0033	0.000362995	0.00682778	phosphoglycerate dehydrogenase	http://www.ncbi.nlm.nih.gov/gene/?term=58835
Angptl1	protein_coding	chr13:74456487-74463031	+	63	72	105	259	135	182	1.32145	2.52868	1.82762e-06	7.78653e-05	angiopoietin-like 1	http://www.ncbi.nlm.nih.gov/gene/?term=679942
Degs2	protein_coding	chr6:132591968-132608600	-	49	30	42	132	57	105	1.32141	1.57003	7.54778e-05	0.0018344	delta(4)-desaturase, sphingolipid 2	http://www.ncbi.nlm.nih.gov/gene/?term=314438
Rgs1	protein_coding	chr13:61066196-61070756	-	461	507	645	1308	1003	1507	1.32063	5.26225	3.9082e-13	7.19801e-11	regulator of G-protein signaling 1	http://www.ncbi.nlm.nih.gov/gene/?term=54289
P2ry6	protein_coding	chr1:165972439-166008351	-	166	109	131	373	276	317	1.32046	3.28795	1.58073e-08	1.11129e-06	pyrimidinergic receptor P2Y6	http://www.ncbi.nlm.nih.gov/gene/?term=117264
LOC103690019	protein_coding	chr4:22661991-22686164	+	16	18	18	49	36	39	1.32009	0.401003	0.000250564	0.00499744	protein DBF4 homolog A-like	http://www.ncbi.nlm.nih.gov/gene/?term=103690019
Gnpda1	protein_coding	chr18:31479117-31489154	-	323	286	381	1094	527	767	1.3192	4.5602	1.32838e-10	1.45882e-08	glucosamine-6-phosphate deaminase 1	http://www.ncbi.nlm.nih.gov/gene/?term=683570
S100a14	NA	chr2:189913433-189919947	+	28	44	41	110	61	100	1.3164	1.46873	3.01119e-05	0.000850492	S100 calcium binding protein A14	http://www.ncbi.nlm.nih.gov/gene/?term=685385
Cybb	protein_coding	chrX:14578330-14610049	+	2457	1556	3050	6212	4649	5729	1.31482	7.38187	4.82644e-11	5.67019e-09	cytochrome b-245 beta chain	http://www.ncbi.nlm.nih.gov/gene/?term=66021
Trpv2	protein_coding	chr10:48903540-48925036	+	1306	1012	1642	3679	2486	3195	1.31481	6.5499	1.12327e-13	2.29602e-11	transient receptor potential cation channel, subfamily V, member 2	http://www.ncbi.nlm.nih.gov/gene/?term=29465
Bhlha15	protein_coding	chr12:12403385-12408222	-	97	95	87	293	142	238	1.31323	2.74893	5.16226e-07	2.5711e-05	basic helix-loop-helix family, member a15	http://www.ncbi.nlm.nih.gov/gene/?term=25334
Fcrl3	protein_coding	chr2:186776470-186797829	+	39	52	56	137	124	82	1.31208	1.83084	3.60843e-05	0.000996107	Fc receptor-like 3	http://www.ncbi.nlm.nih.gov/gene/?term=680697
Gusb	protein_coding	chr12:30202066-30215583	+	664	501	754	1916	1121	1527	1.31198	5.50646	9.85492e-13	1.69995e-10	glucuronidase, beta	http://www.ncbi.nlm.nih.gov/gene/?term=24434
Ttyh2	protein_coding	chr10:103205918-103248911	+	311	286	327	761	582	834	1.30937	4.45741	5.65308e-13	1.00962e-10	tweety family member 2	http://www.ncbi.nlm.nih.gov/gene/?term=287803
Tgfbr1	protein_coding	chr5:63056079-63124107	+	2005	1874	2118	5540	3313	5419	1.30872	7.15111	2.02541e-15	5.55213e-13	transforming growth factor, beta receptor 1	http://www.ncbi.nlm.nih.gov/gene/?term=29591
Gpr183	protein_coding	chr15:108364701-108376221	-	209	278	305	695	587	564	1.30637	4.23094	8.5725e-11	9.64649e-09	G protein-coupled receptor 183	http://www.ncbi.nlm.nih.gov/gene/?term=679975
Ctla4	protein_coding	chr9:67699397-67706130	+	74	79	82	201	175	173	1.30586	2.49502	1.17549e-07	6.74801e-06	cytotoxic T-lymphocyte-associated protein 4	http://www.ncbi.nlm.nih.gov/gene/?term=63835
Dusp2	protein_coding	chr3:119776925-119779110	+	265	280	401	869	688	642	1.3032	4.4796	7.08059e-11	8.0769e-09	dual specificity phosphatase 2	http://www.ncbi.nlm.nih.gov/gene/?term=311406
Cxcl1	protein_coding	chr14:18743678-18745457	-	183	130	246	593	194	558	1.30229	3.72252	4.34508e-05	0.00116094	C-X-C motif chemokine ligand 1	http://www.ncbi.nlm.nih.gov/gene/?term=81503
Gdf15	protein_coding	chr16:20555395-20557978	+	128	131	139	312	290	323	1.3018	3.2442	2.42271e-09	2.03014e-07	growth differentiation factor 15	http://www.ncbi.nlm.nih.gov/gene/?term=29455
LOC102549526	lncRNA	chr4:100484505-100499715	+	59	76	57	298	54	126	1.30134	2.21845	0.00270925	0.0352611	uncharacterized LOC102549526	http://www.ncbi.nlm.nih.gov/gene/?term=102549526
Plaur	protein_coding	chr1:81328171-81344954	+	304	304	338	803	623	784	1.29939	4.48396	5.17507e-14	1.11586e-11	plasminogen activator, urokinase receptor	http://www.ncbi.nlm.nih.gov/gene/?term=50692
Birc3	protein_coding	chr8:6048590-6076823	-	317	294	458	1128	631	755	1.29682	4.65006	2.88892e-10	2.9611e-08	baculoviral IAP repeat-containing 3	http://www.ncbi.nlm.nih.gov/gene/?term=78971
Il9r	protein_coding	chr10:15696882-15708684	+	39	23	39	89	65	82	1.296	1.29405	4.60892e-05	0.00121809	interleukin 9 receptor	http://www.ncbi.nlm.nih.gov/gene/?term=24500
Sap30	protein_coding	chr16:36115950-36121310	+	69	47	70	170	106	161	1.29538	2.15349	2.45809e-06	0.000100373	Sin3A-associated protein	http://www.ncbi.nlm.nih.gov/gene/?term=680122
F3	protein_coding	chr2:225310686-225322281	+	1785	2256	2330	6429	3456	5188	1.29506	7.22758	1.56786e-13	3.15015e-11	coagulation factor III, tissue factor	http://www.ncbi.nlm.nih.gov/gene/?term=25584
C2	protein_coding	chr20:4542340-4561152	-	1093	696	1043	2722	1727	2190	1.29405	6.05696	5.3214e-12	7.90653e-10	complement C2	http://www.ncbi.nlm.nih.gov/gene/?term=24231
LOC678760	misc_RNA	chr9:36323348-36325209	-	71	45	62	170	106	142	1.2928	2.09177	3.9316e-06	0.000150611	similar to Dipeptidyl-peptidase 3 (Dipeptidyl-peptidase III) (DPP III) (Dipeptidyl aminopeptidase III) (Dipeptidyl arylamidase III)	http://www.ncbi.nlm.nih.gov/gene/?term=678760
Frzb	protein_coding	chr3:67635604-67668772	-	83	105	154	285	236	267	1.29221	3.01077	3.17639e-07	1.65914e-05	frizzled-related protein	http://www.ncbi.nlm.nih.gov/gene/?term=295691
Cd8b	protein_coding	chr4:99185960-99201887	+	60	47	76	206	105	120	1.29107	2.12479	1.62674e-05	0.000501523	CD8b molecule	http://www.ncbi.nlm.nih.gov/gene/?term=24931
Prc1	protein_coding	chr1:142087196-142108746	+	471	360	473	1319	747	1001	1.29074	4.93845	5.13072e-12	7.72053e-10	protein regulator of cytokinesis 1	http://www.ncbi.nlm.nih.gov/gene/?term=308761
LOC682865	NA	chr5:150482287-150484168	-	33	21	37	84	51	78	1.28969	1.14428	0.000105418	0.00242536	None	http://www.ncbi.nlm.nih.gov/gene/?term=LOC682865
Cst7	protein_coding	chr3:146363915-146374297	+	186	190	306	664	455	459	1.28893	3.99678	8.11035e-09	6.03786e-07	cystatin F	http://www.ncbi.nlm.nih.gov/gene/?term=296257
Ankle1	protein_coding	chr16:19800390-19826057	+	66	75	71	186	175	125	1.28543	2.33497	5.37054e-06	0.000196191	ankyrin repeat and LEM domain containing 1	http://www.ncbi.nlm.nih.gov/gene/?term=361122
Fcar	protein_coding	chr1:73230392-73263462	-	55	37	69	217	43	130	1.2854	1.94462	0.00270368	0.0352405	Fc fragment of IgA receptor	http://www.ncbi.nlm.nih.gov/gene/?term=365183
Mvd	protein_coding	chr19:55258521-55269108	-	28	41	42	140	43	83	1.28446	1.42501	0.000712826	0.0119295	mevalonate diphosphate decarboxylase	http://www.ncbi.nlm.nih.gov/gene/?term=81726
Sfta2	protein_coding	chr20:3604918-3605643	-	30	40	63	146	62	105	1.28423	1.66706	0.000222093	0.0045084	surfactant associated 2	http://www.ncbi.nlm.nih.gov/gene/?term=415052
Mnda	protein_coding	chr13:92073664-92091335	-	80	78	134	267	204	199	1.28349	2.7781	1.28376e-06	5.73186e-05	myeloid cell nuclear differentiation antigen	http://www.ncbi.nlm.nih.gov/gene/?term=304988
Cd274	protein_coding	chr1:247519890-247539659	+	572	506	601	1973	737	1288	1.28195	5.29701	1.51964e-08	1.07475e-06	CD274 molecule	http://www.ncbi.nlm.nih.gov/gene/?term=499342
Dmbt1	protein_coding	chr1:201620642-203228705	+	175	187	243	549	466	367	1.28134	3.82447	1.23724e-08	8.94712e-07	deleted in malignant brain tumors 1	http://www.ncbi.nlm.nih.gov/gene/?term=170568
Gcat	protein_coding	chr7:120263068-120269365	+	61	60	68	223	87	138	1.28	2.16899	2.70733e-05	0.000776637	glycine C-acetyltransferase	http://www.ncbi.nlm.nih.gov/gene/?term=366959
Qprt	protein_coding	chr1:198544262-198559556	-	24	22	42	72	69	59	1.27961	1.08269	0.000220229	0.00448546	quinolinate phosphoribosyltransferase	http://www.ncbi.nlm.nih.gov/gene/?term=293504
Cd207	protein_coding	chr4:115348496-115354815	-	14	12	13	38	23	30	1.27754	-0.00920559	0.00176921	0.0250551	CD207 molecule	http://www.ncbi.nlm.nih.gov/gene/?term=502852
Cftr	protein_coding	chr4:42693274-42860676	+	319	336	369	1049	474	880	1.27316	4.57904	1.80002e-09	1.54122e-07	cystic fibrosis transmembrane conductance regulator	http://www.ncbi.nlm.nih.gov/gene/?term=24255
LOC103692483	NA	chr5:150525975-150530342	+	2774	2107	9915	9785	12503	9920	1.27314	8.39065	0.00196767	0.0272727	uncharacterized LOC103692483	http://www.ncbi.nlm.nih.gov/gene/?term=103692483
Fam64a	protein_coding	chr10:58613588-58618524	+	19	21	13	57	32	35	1.27279	0.403664	0.00136371	0.0202279	family with sequence similarity 64, member A	http://www.ncbi.nlm.nih.gov/gene/?term=360559
Thy1	protein_coding	chr8:48382121-48386935	+	80	41	89	177	166	131	1.27137	2.30233	5.69631e-05	0.00144604	Thy-1 cell surface antigen	http://www.ncbi.nlm.nih.gov/gene/?term=24832
Ms4a2	protein_coding	chr1:227957363-227965312	-	82	34	78	155	100	192	1.27045	2.19327	0.000213051	0.00436005	membrane spanning 4-domains A2	http://www.ncbi.nlm.nih.gov/gene/?term=25316
Csf1	protein_coding	chr2:210522370-210550546	-	786	671	878	2519	1279	1633	1.26887	5.76054	1.87404e-11	2.43639e-09	colony stimulating factor 1	http://www.ncbi.nlm.nih.gov/gene/?term=78965
Opn3	protein_coding	chr13:93716481-93746994	-	35	35	46	116	65	87	1.2668	1.46792	2.58208e-05	0.000748423	opsin 3	http://www.ncbi.nlm.nih.gov/gene/?term=498289
Litaf	protein_coding	chr10:4753546-4763272	+	1069	1155	1278	3229	2053	2779	1.2665	6.34449	7.59677e-16	2.27658e-13	lipopolysaccharide-induced TNF factor	http://www.ncbi.nlm.nih.gov/gene/?term=65161
Gm2a	protein_coding	chr10:40438394-40450927	+	4805	3856	5693	12755	9518	10391	1.26574	8.37414	1.08822e-14	2.60011e-12	GM2 ganglioside activator	http://www.ncbi.nlm.nih.gov/gene/?term=282838
Fasn	protein_coding	chr10:109987735-110005901	-	11665	13296	13633	39090	20007	30610	1.26498	9.8058	2.79509e-13	5.3427e-11	fatty acid synthase	http://www.ncbi.nlm.nih.gov/gene/?term=50671
Sftpa1	protein_coding	chr16:18716019-18719404	+	111470	87644	106814	339815	141305	236245	1.26466	12.7922	7.15323e-10	6.65664e-08	surfactant protein A1	http://www.ncbi.nlm.nih.gov/gene/?term=24773
Cldn11	protein_coding	chr2:115823541-115836846	-	60	84	98	266	113	185	1.26415	2.50435	1.98165e-05	0.000592352	claudin 11	http://www.ncbi.nlm.nih.gov/gene/?term=84588
Gbp1	protein_coding	chr2:248377445-248423402	+	52	54	94	216	99	147	1.26183	2.22589	4.74544e-05	0.00124118	guanylate binding protein 1	http://www.ncbi.nlm.nih.gov/gene/?term=304266
Ctss	protein_coding	chr2:197655780-197679768	+	1777	1184	2081	4124	3135	4154	1.25938	6.85886	2.47185e-11	3.13295e-09	cathepsin S	http://www.ncbi.nlm.nih.gov/gene/?term=50654
Prrx1	protein_coding	chr13:81147038-81215560	-	77	62	64	152	181	119	1.25779	2.25447	3.6577e-05	0.00100735	paired related homeobox 1	http://www.ncbi.nlm.nih.gov/gene/?term=266813
RGD1561736	protein_coding	chr3:25148527-25149104	+	47	46	119	136	198	125	1.25713	2.28914	0.00135831	0.0201817	similar to ribosomal protein L10	http://www.ncbi.nlm.nih.gov/gene/?term=499794
LOC102557601	lncRNA	chr10:76261195-76262962	-	370	208	440	900	658	738	1.2549	4.5492	5.29358e-08	3.29831e-06	uncharacterized LOC102557601	http://www.ncbi.nlm.nih.gov/gene/?term=102557601
Dhcr24	protein_coding	chr5:126164708-126188926	+	400	374	454	1391	650	798	1.25406	4.82575	2.33915e-09	1.96945e-07	24-dehydrocholesterol reductase	http://www.ncbi.nlm.nih.gov/gene/?term=298298
Slc41a2	protein_coding	chr7:26522314-26607861	+	262	236	269	660	431	659	1.25356	4.1506	4.56643e-11	5.40061e-09	solute carrier family 41 member 2	http://www.ncbi.nlm.nih.gov/gene/?term=362861
Bub1	protein_coding	chr3:120373604-120404910	-	49	43	49	128	94	98	1.25317	1.73526	6.22346e-06	0.000222747	BUB1 mitotic checkpoint serine/threonine kinase	http://www.ncbi.nlm.nih.gov/gene/?term=296137
Phyhd1	protein_coding	chr3:8829593-8846126	+	474	374	526	1271	780	1080	1.25204	4.98429	5.18756e-12	7.74019e-10	phytanoyl-CoA dioxygenase domain containing 1	http://www.ncbi.nlm.nih.gov/gene/?term=296621
Gk	protein_coding	chrX:54227291-54303859	-	312	349	322	1007	398	876	1.24601	4.50513	1.78146e-07	9.87399e-06	glycerol kinase	http://www.ncbi.nlm.nih.gov/gene/?term=79223
Gucy2g	protein_coding	chr1:276187243-276228574	-	26	28	27	81	52	51	1.24495	0.957823	0.000196699	0.00408034	guanylate cyclase 2G	http://www.ncbi.nlm.nih.gov/gene/?term=245708
LOC103690326	protein_coding	chr7:78732765-78756159	+	67	45	72	198	64	165	1.24464	2.10483	0.000413343	0.00763681	dendritic cell-specific transmembrane protein	http://www.ncbi.nlm.nih.gov/gene/?term=103690326
Zfand2a	protein_coding	chr12:17252093-17263477	+	847	814	844	2554	1215	1987	1.24272	5.84792	3.93539e-11	4.70146e-09	zinc finger AN1-type containing 2A	http://www.ncbi.nlm.nih.gov/gene/?term=360772
Cep72	protein_coding	chr1:31834977-31864938	+	22	26	35	83	56	48	1.24256	0.983393	0.000359057	0.00677172	centrosomal protein 72	http://www.ncbi.nlm.nih.gov/gene/?term=308064
Igf1	protein_coding	chr7:28412123-28491815	+	2019	2178	2656	5783	4398	5150	1.24019	7.29133	4.01946e-16	1.28051e-13	insulin-like growth factor 1	http://www.ncbi.nlm.nih.gov/gene/?term=24482
Kcnk13	protein_coding	chr6:123971600-124077249	+	55	58	83	178	124	137	1.23774	2.18368	3.42392e-06	0.000133934	potassium two pore domain channel subfamily K member 13	http://www.ncbi.nlm.nih.gov/gene/?term=64120
Rasd2	protein_coding	chr19:14653198-14663914	+	68	97	101	278	148	178	1.2375	2.62193	5.20455e-06	0.000190719	RASD family, member 2	http://www.ncbi.nlm.nih.gov/gene/?term=171099
H2afz	protein_coding	chr2:243105224-243107333	+	839	637	1298	2692	1584	1948	1.23714	5.97589	1.2953e-08	9.30987e-07	H2A histone family, member Z	http://www.ncbi.nlm.nih.gov/gene/?term=58940
Trim36	protein_coding	chr18:40081028-40134504	-	36	41	47	104	76	98	1.23588	1.54082	1.46775e-05	0.000463001	tripartite motif-containing 36	http://www.ncbi.nlm.nih.gov/gene/?term=291597
Col16a1	protein_coding	chr5:148256933-148311645	+	2450	3325	3497	9305	4229	7654	1.23582	7.72568	1.16168e-09	1.02442e-07	collagen type XVI alpha 1 chain	http://www.ncbi.nlm.nih.gov/gene/?term=366474
Cenpq	protein_coding	chr9:23352271-23368774	+	14	16	17	42	28	36	1.23534	0.209104	0.000927383	0.0148524	centromere protein Q	http://www.ncbi.nlm.nih.gov/gene/?term=363198
Pigr	protein_coding	chr13:47564176-47592093	+	24490	24371	23264	78257	33761	53409	1.23152	10.6877	3.39833e-10	3.41397e-08	polymeric immunoglobulin receptor	http://www.ncbi.nlm.nih.gov/gene/?term=25046
H2afx	protein_coding	chr8:48665652-48666981	+	425	302	452	1087	729	820	1.23131	4.74943	8.64288e-11	9.67182e-09	dolichyl-phosphate N-acetylglucosaminephosphotransferase 1	http://www.ncbi.nlm.nih.gov/gene/?term=300668
LOC252890	snRNA	chr2:14700078-14700137	-	23	25	62	90	52	103	1.22888	1.35432	0.00210166	0.0286724	Z39 small nucleolar RNA	http://www.ncbi.nlm.nih.gov/gene/?term=252890
LOC690862	protein_coding	chr1:227732708-227750515	+	45	33	68	140	101	82	1.22747	1.75619	0.000179393	0.00377375	similar to membrane-spanning 4-domains, subfamily A, member 4C	http://www.ncbi.nlm.nih.gov/gene/?term=690862
Enpp3	protein_coding	chr1:21613148-21684483	+	964	742	1197	2966	1863	1642	1.2272	6.04077	4.08575e-09	3.21782e-07	ectonucleotide pyrophosphatase/phosphodiesterase 3	http://www.ncbi.nlm.nih.gov/gene/?term=54410
Pcolce	protein_coding	chr12:22153995-22160311	+	661	651	891	1642	1776	1365	1.22653	5.64404	8.74708e-10	7.93113e-08	procollagen C-endopeptidase enhancer	http://www.ncbi.nlm.nih.gov/gene/?term=29569
Cd53	protein_coding	chr2:209489279-209537098	-	654	582	955	2413	1041	1497	1.22333	5.63025	5.29789e-08	3.29831e-06	Cd53 molecule	http://www.ncbi.nlm.nih.gov/gene/?term=24251
Hpgds	protein_coding	chr4:95945512-95970666	-	43	14	32	67	62	67	1.22257	1.06794	0.00174375	0.024794	hematopoietic prostaglandin D synthase	http://www.ncbi.nlm.nih.gov/gene/?term=58962
Mcoln2	protein_coding	chr2:252018594-252068209	+	288	173	251	671	361	568	1.22077	4.02042	1.28759e-07	7.33198e-06	mucolipin 2	http://www.ncbi.nlm.nih.gov/gene/?term=292168
Snx8	protein_coding	chr12:16340922-16389500	+	587	492	697	1463	1136	1314	1.22001	5.33044	5.4443e-13	9.77265e-11	sorting nexin 8	http://www.ncbi.nlm.nih.gov/gene/?term=288504
LOC103691037	NA	chr1:73010112-73012754	+	74	44	79	261	95	93	1.21986	2.18322	0.00125164	0.018931	leukocyte immunoglobulin-like receptor subfamily A member 2	http://www.ncbi.nlm.nih.gov/gene/?term=103691037
Gcgr	protein_coding	chr10:109707865-109716129	+	26	18	27	50	47	59	1.21667	0.752467	0.000510577	0.00904107	glucagon receptor	http://www.ncbi.nlm.nih.gov/gene/?term=24953
Lat2	protein_coding	chr12:25114104-25128381	+	314	302	437	992	640	693	1.21395	4.57171	3.36035e-10	3.38543e-08	solute carrier family 7 member 8	http://www.ncbi.nlm.nih.gov/gene/?term=84551
Hvcn1	protein_coding	chr12:39822044-39851089	-	473	478	678	1348	1055	1161	1.21317	5.19889	6.2342e-12	9.10967e-10	hydrogen voltage-gated channel 1	http://www.ncbi.nlm.nih.gov/gene/?term=304485
Basp1	protein_coding	chr2:77586424-77632626	-	205	162	292	457	495	465	1.21208	3.89375	3.64101e-07	1.86748e-05	brain abundant, membrane attached signal protein 1	http://www.ncbi.nlm.nih.gov/gene/?term=64160
Fam55b	NA	chr8:52717341-52734448	+	455	563	578	1666	656	1288	1.21172	5.17465	8.27799e-08	4.93409e-06	neurexophilin and PC-esterase domain family member 4	http://www.ncbi.nlm.nih.gov/gene/?term=500991
Igsf10	protein_coding	chr2:149535199-149563896	-	1215	1148	1643	3286	2518	2959	1.21087	6.49404	1.71707e-13	3.43046e-11	immunoglobulin superfamily, member 10	http://www.ncbi.nlm.nih.gov/gene/?term=310448
Tpmt	protein_coding	chr17:18029149-18047716	+	149	102	201	461	183	370	1.21041	3.35322	3.79315e-05	0.00103818	thiopurine S-methyltransferase	http://www.ncbi.nlm.nih.gov/gene/?term=690050
Slc1a5	protein_coding	chr1:78710686-78724789	+	522	420	572	1263	1007	1040	1.20995	5.09524	4.49152e-12	6.8167e-10	solute carrier family 1 member 5	http://www.ncbi.nlm.nih.gov/gene/?term=292657
Rem2	protein_coding	chr15:33121273-33125752	+	13	14	18	38	37	23	1.20983	0.128078	0.00403166	0.048051	RRAD and GEM like GTPase 2	http://www.ncbi.nlm.nih.gov/gene/?term=64626
RGD1310335	protein_coding	chr11:54373794-54404697	-	30	25	34	83	58	55	1.20885	1.05983	0.000185798	0.00388999	similar to RIKEN cDNA C330027C09	http://www.ncbi.nlm.nih.gov/gene/?term=360711
Rgs18	protein_coding	chr13:61564381-61591139	-	99	76	178	307	201	264	1.20861	2.9919	2.41035e-05	0.000702099	regulator of G-protein signaling 18	http://www.ncbi.nlm.nih.gov/gene/?term=289076
Mxd3	protein_coding	chr17:9830326-9834052	+	19	22	22	51	43	44	1.20574	0.584611	0.000497408	0.00886113	Max dimerization protein 3	http://www.ncbi.nlm.nih.gov/gene/?term=252915
Ebf4	protein_coding	chr3:122836468-122890663	+	21	43	20	78	43	67	1.20496	0.991364	0.00191724	0.026713	early B-cell factor 4	http://www.ncbi.nlm.nih.gov/gene/?term=680751
Vsig2	protein_coding	chr8:40009691-40014734	+	24	43	72	116	85	101	1.20418	1.66733	0.000663881	0.0112596	V-set and immunoglobulin domain containing 2	http://www.ncbi.nlm.nih.gov/gene/?term=300520
Parm1	protein_coding	chr14:17972914-18076870	-	33	43	42	100	79	79	1.20342	1.45084	4.53662e-05	0.00120619	prostate androgen-regulated mucin-like protein 1	http://www.ncbi.nlm.nih.gov/gene/?term=286894
Cyth4	protein_coding	chr7:119820518-119845003	+	988	748	1188	2590	1750	2048	1.20088	6.03349	1.48687e-11	1.9841e-09	cytohesin 4	http://www.ncbi.nlm.nih.gov/gene/?term=500906
LOC100909725	protein_coding	chr1:87166455-87175348	-	17	19	23	48	36	45	1.19879	0.489157	0.000624258	0.0106901	potassium channel subfamily K member 6-like	http://www.ncbi.nlm.nih.gov/gene/?term=100909725
Fam83e	protein_coding	chr1:101703619-101712250	+	92	103	138	356	194	183	1.19803	2.91112	1.41839e-05	0.000450647	family with sequence similarity 83, member E	http://www.ncbi.nlm.nih.gov/gene/?term=292913
Igsf8	protein_coding	chr13:90692507-90700795	+	366	391	463	1128	706	841	1.1977	4.77601	1.06049e-11	1.48226e-09	immunoglobulin superfamily, member 8	http://www.ncbi.nlm.nih.gov/gene/?term=304979
C1qtnf6	protein_coding	chr7:119746150-119752720	-	69	62	97	143	191	147	1.19468	2.36567	7.88123e-05	0.00190366	C1q and tumor necrosis factor related protein 6	http://www.ncbi.nlm.nih.gov/gene/?term=315114
Clcn4	protein_coding	chrX:25016115-25082563	+	67	47	99	215	137	110	1.19242	2.26595	0.000232733	0.00468673	chloride voltage-gated channel 4	http://www.ncbi.nlm.nih.gov/gene/?term=60586
Ncf2	protein_coding	chr13:70226434-70259019	+	660	418	779	1655	1020	1370	1.19164	5.37144	7.89464e-09	5.88967e-07	neutrophil cytosolic factor 2	http://www.ncbi.nlm.nih.gov/gene/?term=364018
Ftl1	protein_coding	chr1:101448190-101450034	-	2844	1810	2771	7128	3929	5236	1.19001	7.37284	7.49157e-10	6.9298e-08	ferritin light chain 1	http://www.ncbi.nlm.nih.gov/gene/?term=29292
Them5	protein_coding	chr2:195582781-195588000	+	620	325	511	1586	581	1087	1.18937	5.02744	1.16492e-05	0.000381778	thioesterase superfamily member 5	http://www.ncbi.nlm.nih.gov/gene/?term=361993
Il36b	protein_coding	chr3:1366123-1464851	-	70	32	51	154	90	91	1.18733	1.80718	0.000427829	0.00786051	interleukin 36, beta	http://www.ncbi.nlm.nih.gov/gene/?term=362076
Slc16a1	protein_coding	chr2:207108552-207128561	+	663	411	586	1582	798	1269	1.18476	5.21259	2.61152e-08	1.72179e-06	solute carrier family 16 member 1	http://www.ncbi.nlm.nih.gov/gene/?term=25027
Ms4a6c	protein_coding	chr1:227668498-227678523	+	98	101	191	325	266	239	1.18423	3.11868	1.58697e-05	0.000491796	membrane-spanning 4-domains, subfamily A, member 6C	http://www.ncbi.nlm.nih.gov/gene/?term=690930
Serping1	protein_coding	chr3:72161230-72171109	-	1204	1030	1304	3421	1858	2461	1.18394	6.30075	9.68046e-12	1.36928e-09	serpin family G member 1	http://www.ncbi.nlm.nih.gov/gene/?term=295703
Slc25a43	protein_coding	chrX:123349681-123384798	+	102	105	121	280	188	243	1.18363	2.88363	1.83093e-07	1.01165e-05	solute carrier family 25, member 43	http://www.ncbi.nlm.nih.gov/gene/?term=298318
Gna15	protein_coding	chr7:11054246-11075152	+	296	214	390	745	541	647	1.18302	4.32233	1.85747e-08	1.27294e-06	guanine nucleotide binding protein, alpha 15	http://www.ncbi.nlm.nih.gov/gene/?term=89788
Ap1s3	protein_coding	chr9:85386752-85445981	-	50	49	53	133	87	110	1.18236	1.79303	1.20919e-05	0.00039301	adaptor related protein complex 1 sigma 3 subunit	http://www.ncbi.nlm.nih.gov/gene/?term=367304
Idh1	protein_coding	chr9:71882108-71911626	-	596	470	538	1693	716	1142	1.18195	5.16351	4.19422e-08	2.67236e-06	isocitrate dehydrogenase (NADP(+)) 1, cytosolic	http://www.ncbi.nlm.nih.gov/gene/?term=24479
LOC100363469	misc_RNA	chr10:78992540-78993047	-	214	216	361	725	446	536	1.18166	4.13385	9.02577e-08	5.31064e-06	ribosomal protein S24-like	http://www.ncbi.nlm.nih.gov/gene/?term=100363469
Plet1	protein_coding	chr8:54925666-54937007	+	1244	825	1345	3113	1652	2685	1.18161	6.24457	4.15864e-09	3.26071e-07	placenta expressed transcript 1	http://www.ncbi.nlm.nih.gov/gene/?term=363060
LOC100912338	protein_coding	chr2:198418611-198419131	+	2182	1121	2288	5027	3530	3455	1.18151	6.9535	1.9854e-07	1.08681e-05	histone H2B type 2-B-like	http://www.ncbi.nlm.nih.gov/gene/?term=100912338
B3gnt3	protein_coding	chr16:20123948-20133322	-	12	19	18	52	22	34	1.18102	0.233621	0.00411667	0.048849	UDP-GlcNAc:betaGal beta-1,3-N-acetylglucosaminyltransferase 3	http://www.ncbi.nlm.nih.gov/gene/?term=290638
Rab32	protein_coding	chr1:4638663-4653220	-	468	357	492	1135	748	962	1.17876	4.87323	3.86417e-11	4.63202e-09	RAB32, member RAS oncogene family	http://www.ncbi.nlm.nih.gov/gene/?term=365042
Mfsd7	protein_coding	chr14:2311122-2319574	+	61	50	87	165	104	158	1.17793	2.15572	2.67737e-05	0.000770988	major facilitator superfamily domain containing 7	http://www.ncbi.nlm.nih.gov/gene/?term=305625
Gen1	protein_coding	chr6:36910675-36940868	-	28	44	29	89	63	66	1.17286	1.21901	0.00034889	0.00662486	GEN1 Holliday junction 5' flap endonuclease	http://www.ncbi.nlm.nih.gov/gene/?term=298884
LOC500066	NA	chr4:57204849-57248912	+	106	106	121	263	224	222	1.17275	2.89825	3.07629e-07	1.61161e-05	None	http://www.ncbi.nlm.nih.gov/gene/?term=LOC500066
Htatip2	protein_coding	chr1:105094332-105109459	+	135	87	146	369	187	243	1.17226	3.03738	1.10524e-05	0.000365607	HIV-1 Tat interactive protein 2	http://www.ncbi.nlm.nih.gov/gene/?term=292935
Parvg	protein_coding	chr7:125288081-125307587	+	985	757	1226	2602	1664	2101	1.17138	6.03377	8.81782e-11	9.83646e-09	parvin, gamma	http://www.ncbi.nlm.nih.gov/gene/?term=689069
Tubb6	protein_coding	chr18:63130542-63140181	+	635	323	785	1491	1026	1196	1.17099	5.26218	1.73139e-06	7.41228e-05	tubulin, beta 6 class V	http://www.ncbi.nlm.nih.gov/gene/?term=307351
Brip1	protein_coding	chr10:73507009-73632584	-	34	37	35	92	71	64	1.17083	1.28089	0.000155657	0.00336006	BRCA1 interacting protein C-terminal helicase 1	http://www.ncbi.nlm.nih.gov/gene/?term=360588
Nabp1	protein_coding	chr9:55050194-55057659	+	345	302	535	1312	490	785	1.17049	4.70368	6.80769e-06	0.000239503	nucleic acid binding protein 1	http://www.ncbi.nlm.nih.gov/gene/?term=363227
LOC678766	NA	chr19:56431787-56443896	+	1027	840	984	2871	1293	2070	1.16878	5.98175	3.20994e-09	2.58565e-07	None	http://www.ncbi.nlm.nih.gov/gene/?term=LOC678766
Prdx1l1	misc_RNA	chr2:208738117-208738952	+	76	29	68	170	87	117	1.16609	1.96142	0.000944679	0.0150884	peroxiredoxin 1-like 1	http://www.ncbi.nlm.nih.gov/gene/?term=100363379
LOC103693267	protein_coding	chr10:4762078-4767637	-	804	865	998	2326	1425	1980	1.16596	5.88069	9.84902e-13	1.69995e-10	uncharacterized LOC103693267	http://www.ncbi.nlm.nih.gov/gene/?term=103693267
Egr2	protein_coding	chr20:22454461-22460984	-	81	112	119	272	217	172	1.16523	2.79847	1.18875e-05	0.000387865	early growth response 2	http://www.ncbi.nlm.nih.gov/gene/?term=114090
Wdhd1	protein_coding	chr15:24021674-24056075	-	64	68	76	163	125	155	1.16475	2.22299	2.79535e-06	0.000112329	WD repeat and HMG-box DNA binding protein 1	http://www.ncbi.nlm.nih.gov/gene/?term=305827
Ly96	protein_coding	chr5:1972212-1989448	-	34	26	31	85	56	54	1.16346	1.06354	0.000375284	0.00702901	lymphocyte antigen 96	http://www.ncbi.nlm.nih.gov/gene/?term=448830
Eno1	protein_coding	chr5:167288223-167299613	+	4314	2905	4656	11024	6286	8178	1.16248	8.02885	6.50749e-10	6.16938e-08	enolase 1	http://www.ncbi.nlm.nih.gov/gene/?term=24333
Slc2a1	protein_coding	chr5:138154677-138182897	+	692	594	731	1636	1253	1382	1.15909	5.47474	6.40117e-13	1.13748e-10	solute carrier family 2 member 1	http://www.ncbi.nlm.nih.gov/gene/?term=24778
Sec61b	protein_coding	chr5:63192322-63200532	+	716	384	685	1682	883	1272	1.15852	5.29544	3.52838e-07	1.81617e-05	Sec61 translocon beta subunit	http://www.ncbi.nlm.nih.gov/gene/?term=298068
Gapdh	protein_coding	chr4:157676396-157680271	-	2808	2191	3562	8126	4650	5427	1.15208	7.54717	9.65178e-10	8.68464e-08	glyceraldehyde-3-phosphate dehydrogenase	http://www.ncbi.nlm.nih.gov/gene/?term=24383
Emilin2	protein_coding	chr9:119594049-119653676	-	731	485	908	1794	1036	1683	1.15195	5.53659	5.34791e-08	3.31718e-06	elastin microfibril interfacer 2	http://www.ncbi.nlm.nih.gov/gene/?term=316736
Tec	protein_coding	chr14:37918881-38027953	+	471	408	597	1390	738	1024	1.15171	5.0153	2.77282e-09	2.28561e-07	tec protein tyrosine kinase	http://www.ncbi.nlm.nih.gov/gene/?term=84492
LOC102547056	protein_coding	chr1:1181319-1203953	+	24	30	25	84	40	46	1.14886	0.863148	0.00166245	0.0238393	retinoic acid early-inducible protein 1-gamma-like	http://www.ncbi.nlm.nih.gov/gene/?term=102547056
LOC100361706	protein_coding	chr11:86092956-86096399	+	142	71	86	327	163	154	1.14837	2.73599	0.00054865	0.00961766	lambda-chain C1-region-like	http://www.ncbi.nlm.nih.gov/gene/?term=100361706
RT1-Da	protein_coding	chr20:4127644-4132616	-	3062	2447	3523	8100	5034	5987	1.14819	7.62476	8.27454e-12	1.18424e-09	RT1 class II, locus Da	http://www.ncbi.nlm.nih.gov/gene/?term=294269
Col9a2	protein_coding	chr5:139963002-139979865	+	138	177	187	461	308	291	1.14747	3.4673	6.06096e-07	2.936e-05	collagen type IX alpha 2 chain	http://www.ncbi.nlm.nih.gov/gene/?term=362584
Ppp1r14b	protein_coding	chr1:222229835-222231945	+	398	373	468	973	700	932	1.14485	4.76188	1.45508e-11	1.95262e-09	protein phosphatase 1, regulatory (inhibitor) subunit 14B	http://www.ncbi.nlm.nih.gov/gene/?term=259225
LOC102554819	lncRNA	chr10:53502328-53513002	+	34	32	22	88	33	70	1.1442	1.01622	0.0028894	0.0370602	uncharacterized LOC102554819	http://www.ncbi.nlm.nih.gov/gene/?term=102554819
Bai1	NA	chr7:115766484-115828514	+	14	20	17	41	28	39	1.14415	0.261315	0.00222823	0.0301203	adhesion G protein-coupled receptor B1	http://www.ncbi.nlm.nih.gov/gene/?term=362931
Pls1	protein_coding	chr8:103557361-103659625	-	387	396	478	1221	603	868	1.14387	4.78635	4.24699e-09	3.31528e-07	plastin 1	http://www.ncbi.nlm.nih.gov/gene/?term=315926
Pgr	protein_coding	chr8:7128656-7187796	+	27	22	23	60	43	49	1.14357	0.728761	0.000654596	0.0111341	progesterone receptor	http://www.ncbi.nlm.nih.gov/gene/?term=25154
B3gnt7	protein_coding	chr9:93326283-93330234	+	261	398	410	912	579	766	1.14354	4.54863	1.36228e-08	9.70658e-07	UDP-GlcNAc:betaGal beta-1,3-N-acetylglucosaminyltransferase 7	http://www.ncbi.nlm.nih.gov/gene/?term=316583
Incenp	protein_coding	chr1:225923448-225953384	-	178	196	249	506	352	449	1.14181	3.77002	1.36422e-08	9.70658e-07	inner centromere protein	http://www.ncbi.nlm.nih.gov/gene/?term=293733
Ncapg	protein_coding	chr14:69898253-69927955	-	78	72	94	210	123	183	1.14138	2.43209	6.92474e-06	0.000242689	non-SMC condensin I complex, subunit G	http://www.ncbi.nlm.nih.gov/gene/?term=305392
Mafb	protein_coding	chr3:156338993-156340913	-	247	281	328	673	543	568	1.14122	4.22756	1.04243e-09	9.28523e-08	MAF bZIP transcription factor B	http://www.ncbi.nlm.nih.gov/gene/?term=54264
Nos2	protein_coding	chr10:66188290-66221621	+	47	37	47	79	101	89	1.141	1.55254	0.000323711	0.00620607	nitric oxide synthase 2	http://www.ncbi.nlm.nih.gov/gene/?term=24599
Hmgcs1	protein_coding	chr2:52427351-52445082	+	1146	1211	1529	5467	1278	1805	1.13975	6.40328	0.000657256	0.011174	3-hydroxy-3-methylglutaryl-CoA synthase 2	http://www.ncbi.nlm.nih.gov/gene/?term=24450
Megf6	protein_coding	chr5:171588901-171620947	+	201	343	244	802	350	543	1.13887	4.11576	9.73441e-06	0.000327213	multiple EGF-like-domains 6	http://www.ncbi.nlm.nih.gov/gene/?term=65049
Susd3	protein_coding	chr17:15814132-15830328	+	194	180	291	681	312	420	1.13864	3.8574	4.28369e-06	0.000161899	sushi domain containing 3	http://www.ncbi.nlm.nih.gov/gene/?term=306810
Cd300a	protein_coding	chr10:103437978-103451170	+	259	242	454	795	477	727	1.1375	4.37186	7.90478e-07	3.73702e-05	Cd300a molecule	http://www.ncbi.nlm.nih.gov/gene/?term=501736
Cyp2d1	protein_coding	chr7:123625641-123630045	-	23	16	23	43	33	54	1.13747	0.517506	0.00193603	0.0269111	cytochrome P450, family 2, subfamily d, polypeptide 1	http://www.ncbi.nlm.nih.gov/gene/?term=266684
Tmem132c	protein_coding	chr12:32806372-33130731	-	405	344	427	1037	640	799	1.13667	4.68254	1.57796e-10	1.69091e-08	transmembrane protein 132C	http://www.ncbi.nlm.nih.gov/gene/?term=363915
Tspan11	protein_coding	chr4:160455848-160522905	+	183	230	255	580	353	473	1.13656	3.86839	2.95451e-08	1.93119e-06	tetraspanin 11	http://www.ncbi.nlm.nih.gov/gene/?term=312727
Slc9a7	protein_coding	chrX:2434914-2615314	+	171	205	288	543	415	417	1.13408	3.85263	2.28641e-07	1.23438e-05	solute carrier family 9 member A7	http://www.ncbi.nlm.nih.gov/gene/?term=317170
Ctsw	protein_coding	chr1:220844579-220847967	-	67	69	77	235	117	100	1.13406	2.23751	0.000296696	0.00577104	cathepsin W	http://www.ncbi.nlm.nih.gov/gene/?term=293676
Sftpd	protein_coding	chr16:18753456-18766100	-	5158	4352	5527	14896	5901	11401	1.13334	8.35241	7.58176e-08	4.53648e-06	surfactant protein D	http://www.ncbi.nlm.nih.gov/gene/?term=25350
Lyz2	protein_coding	chr7:60335968-60341264	-	156548	110491	126299	401816	165812	276029	1.13241	13.0658	1.60931e-07	9.01877e-06	lysozyme 2	http://www.ncbi.nlm.nih.gov/gene/?term=25211
C5ar1	protein_coding	chr1:78186777-78195132	-	466	335	569	1251	745	872	1.13209	4.89325	2.63755e-08	1.73363e-06	complement C5a receptor 1	http://www.ncbi.nlm.nih.gov/gene/?term=113959
Plcxd2	protein_coding	chr11:57207656-57260001	+	94	122	118	321	169	216	1.13133	2.87589	7.37907e-06	0.000256325	phosphatidylinositol-specific phospholipase C, X domain containing 2	http://www.ncbi.nlm.nih.gov/gene/?term=363781
Plk4	protein_coding	chr2:127686912-127705518	+	126	97	127	296	201	234	1.13099	2.94066	1.04051e-06	4.78474e-05	polo-like kinase 4	http://www.ncbi.nlm.nih.gov/gene/?term=310344
Clic1	protein_coding	chr20:5040318-5049166	+	2203	1319	2172	5108	2907	3946	1.13009	6.94771	1.54307e-08	1.08914e-06	chloride intracellular channel 1	http://www.ncbi.nlm.nih.gov/gene/?term=406864
Metrnl	protein_coding	chr10:110893261-110907256	+	408	303	572	1122	691	859	1.1298	4.79399	8.69124e-08	5.13946e-06	meteorin-like, glial cell differentiation regulator	http://www.ncbi.nlm.nih.gov/gene/?term=316842
Dok3	protein_coding	chr17:9639144-9644090	+	307	239	484	892	520	734	1.12901	4.47509	9.22834e-07	4.29385e-05	docking protein 3	http://www.ncbi.nlm.nih.gov/gene/?term=306760
Sfmbt2	protein_coding	chr17:71719012-71904290	-	35	28	26	93	45	51	1.12896	1.01589	0.00161317	0.0232791	Scm-like with four mbt domains 2	http://www.ncbi.nlm.nih.gov/gene/?term=307106
Lat	protein_coding	chr1:197765642-197771123	-	127	135	245	401	357	275	1.12856	3.45625	3.76475e-05	0.00103201	linker for activation of T cells	http://www.ncbi.nlm.nih.gov/gene/?term=81511
Slc13a2	protein_coding	chr10:65664665-65692045	-	64	100	82	201	107	211	1.12645	2.43966	0.000112915	0.00256779	solute carrier family 13 member 2	http://www.ncbi.nlm.nih.gov/gene/?term=65202
RT1-M2	protein_coding	chr20:1337046-1339488	-	47	28	48	80	99	70	1.12588	1.4502	0.00127584	0.0192065	RT1 class Ib, locus M2	http://www.ncbi.nlm.nih.gov/gene/?term=24988
LOC100360087	protein_coding	chr5:152325856-152326797	+	437	368	515	1225	671	870	1.12502	4.8378	3.17522e-09	2.56352e-07	ferritin light chain 1-like	http://www.ncbi.nlm.nih.gov/gene/?term=100360087
LOC100910286	lncRNA	chr3:120899194-120955505	-	35	33	75	129	72	96	1.12452	1.65413	0.00112711	0.0173896	uncharacterized LOC100910286	http://www.ncbi.nlm.nih.gov/gene/?term=100910286
Sh3pxd2b	protein_coding	chr10:17209152-17296449	+	706	823	871	1713	1573	1632	1.12341	5.70107	1.36185e-11	1.85222e-09	SH3 and PX domains 2B	http://www.ncbi.nlm.nih.gov/gene/?term=303021
Tcirg1	protein_coding	chr1:219126687-219139466	-	619	666	825	1789	1198	1389	1.12314	5.51198	1.64055e-11	2.16467e-09	T-cell immune regulator 1, ATPase H+ transporting V0 subunit A3	http://www.ncbi.nlm.nih.gov/gene/?term=293650
Gcsam	protein_coding	chr11:60168938-60180230	-	185	127	223	477	269	370	1.12304	3.53674	2.53552e-06	0.000103059	germinal center-associated, signaling and motility	http://www.ncbi.nlm.nih.gov/gene/?term=685692
Galc	protein_coding	chr6:122177195-122239411	-	133	176	200	423	284	349	1.12294	3.46837	3.01736e-07	1.58543e-05	galactosylceramidase	http://www.ncbi.nlm.nih.gov/gene/?term=314360
Aldoc	protein_coding	chr10:65586504-65590093	+	150	85	128	410	165	197	1.12284	2.98938	0.000335934	0.00641777	aldolase, fructose-bisphosphate C	http://www.ncbi.nlm.nih.gov/gene/?term=24191
Tmem200a	protein_coding	chr1:20330667-20413921	+	42	37	41	91	87	68	1.12241	1.41995	0.000280664	0.00550768	transmembrane protein 200A	http://www.ncbi.nlm.nih.gov/gene/?term=498987
Prdx1	protein_coding	chr5:135536413-135551986	+	3396	1793	3361	8266	3880	5846	1.12163	7.52662	1.62654e-06	7.04012e-05	peroxiredoxin 1	http://www.ncbi.nlm.nih.gov/gene/?term=117254
Creg1	protein_coding	chr13:83972102-83984675	+	882	610	838	1903	1248	1691	1.12086	5.65622	3.28844e-10	3.32245e-08	cellular repressor of E1A-stimulated genes 1	http://www.ncbi.nlm.nih.gov/gene/?term=289185
Crmp1	protein_coding	chr14:78266931-78312778	-	30	18	15	54	34	44	1.1196	0.537366	0.00423356	0.0499523	collapsin response mediator protein 1	http://www.ncbi.nlm.nih.gov/gene/?term=25415
Selp	protein_coding	chr13:82428943-82464629	+	132	79	103	238	200	208	1.11941	2.78077	1.67622e-05	0.000513644	selectin P	http://www.ncbi.nlm.nih.gov/gene/?term=25651
Oma1	protein_coding	chr5:122847631-122900475	+	199	171	259	548	310	451	1.11905	3.76668	2.65184e-07	1.40802e-05	OMA1 zinc metallopeptidase	http://www.ncbi.nlm.nih.gov/gene/?term=298282
C1r	protein_coding	chr4:157126060-157136825	+	3341	1918	3167	6739	5129	5417	1.11566	7.50354	1.21637e-08	8.81418e-07	complement C1r	http://www.ncbi.nlm.nih.gov/gene/?term=312705
Cxcr6	protein_coding	chr8:132869712-132870766	+	188	167	215	554	352	272	1.11493	3.62628	8.10343e-06	0.000277131	C-X-C motif chemokine receptor 6	http://www.ncbi.nlm.nih.gov/gene/?term=100124593
Dennd2d	protein_coding	chr2:209097894-209116971	+	330	291	469	1144	439	713	1.11466	4.55135	7.16161e-06	0.000250493	DENN domain containing 2D	http://www.ncbi.nlm.nih.gov/gene/?term=310772
Mfsd2a	protein_coding	chr5:140642865-140657745	-	44	142	131	238	174	239	1.11344	2.7837	0.00152685	0.0222192	major facilitator superfamily domain containing 2A	http://www.ncbi.nlm.nih.gov/gene/?term=298504
Tmem59l	protein_coding	chr16:20691962-20695701	+	81	49	64	210	74	128	1.11333	2.09552	0.00100588	0.0158724	transmembrane protein 59-like	http://www.ncbi.nlm.nih.gov/gene/?term=306349
Cenpn	protein_coding	chr19:49457462-49479996	+	58	66	82	169	117	138	1.11309	2.17174	1.59119e-05	0.00049185	centromere protein N	http://www.ncbi.nlm.nih.gov/gene/?term=361416
Pkhd1	protein_coding	chr9:26164969-26736700	-	68	113	109	269	123	216	1.11304	2.66094	0.000128578	0.0028632	polycystic kidney and hepatic disease 1	http://www.ncbi.nlm.nih.gov/gene/?term=301287
Sfxn1	protein_coding	chr17:11046588-11082161	-	113	106	116	277	173	244	1.11196	2.867	1.37256e-06	6.06293e-05	sideroflexin 1	http://www.ncbi.nlm.nih.gov/gene/?term=364678
Ctsh	protein_coding	chr8:97439153-97458293	+	15764	10684	13179	39973	15635	28278	1.11189	9.73926	7.98157e-07	3.76624e-05	cathepsin H	http://www.ncbi.nlm.nih.gov/gene/?term=25425
Apobec1	protein_coding	chr4:155386367-155414032	-	80	88	116	224	190	162	1.1079	2.62282	1.81281e-05	0.000547436	apolipoprotein B mRNA editing enzyme catalytic subunit 1	http://www.ncbi.nlm.nih.gov/gene/?term=25383
Amdhd2	protein_coding	chr10:13528400-13536990	-	211	254	300	657	428	486	1.10705	4.04179	2.44995e-08	1.62542e-06	amidohydrolase domain containing 2	http://www.ncbi.nlm.nih.gov/gene/?term=302972
Kcnd1	protein_coding	chrX:15506724-15520712	-	34	26	41	91	62	54	1.10674	1.16571	0.000790901	0.0130143	potassium voltage-gated channel subfamily D member 1	http://www.ncbi.nlm.nih.gov/gene/?term=116695
Sec11c	protein_coding	chr18:61490051-61506393	+	616	339	541	1426	635	1068	1.10652	5.00816	4.56456e-06	0.000171358	SEC11 homolog C, signal peptidase complex subunit	http://www.ncbi.nlm.nih.gov/gene/?term=266758
C3ar1	protein_coding	chr4:155681767-155691114	-	162	136	275	511	279	388	1.10646	3.61738	1.85647e-05	0.000559662	complement C3a receptor 1	http://www.ncbi.nlm.nih.gov/gene/?term=84007
Ap2s1	protein_coding	chr1:78671238-78682847	+	747	436	824	1692	989	1449	1.10509	5.42468	2.86766e-07	1.51579e-05	adaptor-related protein complex 2, sigma 1 subunit	http://www.ncbi.nlm.nih.gov/gene/?term=65046
Tyrobp	protein_coding	chr1:88875377-88879305	+	1383	754	1748	3184	2134	2594	1.1043	6.37104	1.63052e-06	7.04871e-05	Tyro protein tyrosine kinase binding protein	http://www.ncbi.nlm.nih.gov/gene/?term=361537
Npl	protein_coding	chr13:70938073-70981000	-	145	205	171	462	235	387	1.10329	3.49535	4.52138e-06	0.00017009	N-acetylneuraminate pyruvate lyase	http://www.ncbi.nlm.nih.gov/gene/?term=304860
Mt2A	protein_coding	chr19:11307966-11308740	-	86	109	177	221	194	336	1.10322	2.99765	0.000216989	0.00443279	metallothionein 2A	http://www.ncbi.nlm.nih.gov/gene/?term=689415
Dlgap5	protein_coding	chr15:24167484-24199414	-	37	33	46	92	79	64	1.10312	1.35598	0.00040829	0.00757103	DLG associated protein 5	http://www.ncbi.nlm.nih.gov/gene/?term=289997
Mthfd2	protein_coding	chr4:115004448-115015965	-	86	99	136	267	181	207	1.10263	2.79268	8.05232e-06	0.000276184	methylenetetrahydrofolate dehydrogenase (NADP+ dependent) 2, methenyltetrahydrofolate cyclohydrolase	http://www.ncbi.nlm.nih.gov/gene/?term=680308
Ccnf	protein_coding	chr10:13594687-13619935	-	48	55	60	117	113	99	1.10242	1.83547	9.15491e-05	0.00217127	cyclin F	http://www.ncbi.nlm.nih.gov/gene/?term=117524
Fam3b	protein_coding	chr11:37922308-37993270	-	172	216	162	508	243	398	1.10213	3.57563	5.83427e-06	0.000210307	family with sequence similarity 3, member B	http://www.ncbi.nlm.nih.gov/gene/?term=304050
Atp6v1a	protein_coding	chr11:61531391-61584634	+	3012	2515	3013	7491	4178	5985	1.10184	7.51656	2.71699e-11	3.37116e-09	ATPase H+ transporting V1 subunit A	http://www.ncbi.nlm.nih.gov/gene/?term=685232
Irf4	protein_coding	chr17:34886746-34905192	-	481	319	367	1161	576	691	1.10033	4.6519	1.10957e-06	5.07168e-05	interferon regulatory factor 4	http://www.ncbi.nlm.nih.gov/gene/?term=291100
Bdh1	protein_coding	chr11:72577547-72619429	-	91	87	97	230	165	166	1.09979	2.5769	6.06348e-06	0.000217573	3-hydroxybutyrate dehydrogenase, type 1	http://www.ncbi.nlm.nih.gov/gene/?term=117099
Tlr2	protein_coding	chr2:182840171-182846061	-	515	398	802	1438	906	1142	1.09869	5.18787	3.93542e-07	2.00525e-05	toll-like receptor 2	http://www.ncbi.nlm.nih.gov/gene/?term=310553
LOC680097	NA	chr17:43821122-43821587	-	1604	816	2087	3596	2665	2815	1.0973	6.57871	8.91178e-06	0.00030128	None	http://www.ncbi.nlm.nih.gov/gene/?term=LOC680097
Neurl3	protein_coding	chr9:42831737-42840628	-	164	116	202	384	274	319	1.09657	3.36914	2.73463e-06	0.000110234	neuralized E3 ubiquitin protein ligase 3	http://www.ncbi.nlm.nih.gov/gene/?term=316326
Bhlhe40	protein_coding	chr4:140703619-140709319	+	1089	1072	1491	2519	2281	2523	1.09597	6.28183	8.11337e-11	9.19568e-09	basic helix-loop-helix family, member e40	http://www.ncbi.nlm.nih.gov/gene/?term=79431
Hn1l	protein_coding	chr10:14304108-14324170	-	386	398	527	1048	687	935	1.09581	4.80707	6.20533e-10	5.91463e-08	hematological and neurological expressed 1-like	http://www.ncbi.nlm.nih.gov/gene/?term=360492
Rimkla	misc_RNA	chr5:138518559-138545545	-	50	53	56	111	123	83	1.09499	1.79556	0.00039049	0.00727651	ribosomal modification protein rimK-like family member A	http://www.ncbi.nlm.nih.gov/gene/?term=313553
Crip1	protein_coding	chr6:137959171-137967042	+	3284	1685	3125	7095	4085	5396	1.09496	7.43013	6.31274e-07	3.03716e-05	cysteine rich protein 1	http://www.ncbi.nlm.nih.gov/gene/?term=691657
Prg4	protein_coding	chr13:67672588-67688902	-	347	441	429	1093	456	983	1.09406	4.70471	2.11953e-06	8.83855e-05	proteoglycan 4	http://www.ncbi.nlm.nih.gov/gene/?term=289104
Atp13a4	protein_coding	chr11:74833816-74968160	+	650	709	630	1852	838	1447	1.09379	5.41522	5.64957e-08	3.46239e-06	ATPase 13A4	http://www.ncbi.nlm.nih.gov/gene/?term=288026
Brca1	protein_coding	chr10:89394821-89455009	-	82	90	113	239	153	188	1.09255	2.61906	7.95235e-06	0.000273286	BRCA1, DNA repair associated	http://www.ncbi.nlm.nih.gov/gene/?term=497672
Tnip3	protein_coding	chr4:96386206-96490517	+	53	34	46	97	80	92	1.09251	1.54458	0.000220328	0.00448546	TNFAIP3 interacting protein 3	http://www.ncbi.nlm.nih.gov/gene/?term=689756
Tifab	protein_coding	chr17:9236112-9239266	+	105	121	142	317	219	210	1.09189	2.98401	4.86503e-06	0.000180842	TIFA inhibitor	http://www.ncbi.nlm.nih.gov/gene/?term=364674
Tnc	protein_coding	chr5:79789686-79874550	-	750	566	775	1230	1479	1427	1.09099	5.47896	5.47469e-08	3.37864e-06	tenascin C	http://www.ncbi.nlm.nih.gov/gene/?term=116640
Zfp334	protein_coding	chr3:162073573-162080486	-	70	59	91	115	155	164	1.09054	2.2461	0.000278589	0.00547303	zinc finger protein 334	http://www.ncbi.nlm.nih.gov/gene/?term=311639
Lpxn	protein_coding	chr1:229642437-229674129	+	462	270	580	1184	692	783	1.08741	4.7974	5.06458e-06	0.000186477	leupaxin	http://www.ncbi.nlm.nih.gov/gene/?term=293783
Mmp19	protein_coding	chr7:3216392-3224202	+	305	252	338	777	427	622	1.08532	4.25347	4.78051e-08	3.01872e-06	matrix metallopeptidase 19	http://www.ncbi.nlm.nih.gov/gene/?term=304608
Ndc80	protein_coding	chr9:119837857-119871435	-	26	33	32	68	56	59	1.08329	1.00969	0.000585156	0.0101433	NDC80 kinetochore complex component	http://www.ncbi.nlm.nih.gov/gene/?term=301701
Tbxas1	protein_coding	chr4:66624181-66846745	+	584	611	775	1561	1050	1360	1.08194	5.38476	7.59137e-11	8.63171e-09	thromboxane A synthase 1	http://www.ncbi.nlm.nih.gov/gene/?term=24886
Pim1	protein_coding	chr20:8165423-8169557	+	782	585	754	1685	1137	1462	1.08136	5.49451	2.1195e-10	2.21091e-08	Pim-1 proto-oncogene, serine/threonine kinase	http://www.ncbi.nlm.nih.gov/gene/?term=24649
Acsl4	protein_coding	chrX:113596247-113660024	-	2151	2242	2438	6357	2724	4989	1.08054	7.17991	3.67178e-08	2.36937e-06	acyl-CoA synthetase long-chain family member 4	http://www.ncbi.nlm.nih.gov/gene/?term=113976
Gpr65	protein_coding	chr6:122248539-122256115	+	109	110	186	352	226	235	1.08033	3.1056	2.82159e-05	0.000804006	G-protein coupled receptor 65	http://www.ncbi.nlm.nih.gov/gene/?term=299242
Rmdn2	protein_coding	chr6:2215059-2292289	+	2379	2560	2123	6970	2376	5375	1.07868	7.23326	7.78726e-06	0.000268133	regulator of microtubule dynamics 2	http://www.ncbi.nlm.nih.gov/gene/?term=313840
Fuca1	protein_coding	chr5:154269296-154286545	+	1478	1018	1443	3178	2089	2673	1.07813	6.38297	7.04147e-10	6.58896e-08	fucosidase, alpha-L- 1, tissue	http://www.ncbi.nlm.nih.gov/gene/?term=24375
Cldn10	protein_coding	chr15:104026589-104115748	+	150	148	209	458	243	327	1.07775	3.42996	3.7764e-06	0.00014547	claudin 10	http://www.ncbi.nlm.nih.gov/gene/?term=290485
Kif20a	protein_coding	chr18:27424328-27432814	+	184	229	253	567	336	444	1.07738	3.82409	1.8929e-07	1.04101e-05	kinesin family member 20A	http://www.ncbi.nlm.nih.gov/gene/?term=361308
Nme1	protein_coding	chr10:81657153-81666523	-	93	97	144	284	156	235	1.07658	2.83116	2.66544e-05	0.000770153	NME/NM23 nucleoside diphosphate kinase 1	http://www.ncbi.nlm.nih.gov/gene/?term=191575
Slc39a14	protein_coding	chr15:51982872-52029841	-	317	301	370	564	755	600	1.07395	4.38831	1.97281e-06	8.32488e-05	solute carrier family 39 member 14	http://www.ncbi.nlm.nih.gov/gene/?term=306009
RGD1565785	protein_coding	chrX:54390733-54409466	+	76	61	71	190	115	115	1.07382	2.16411	0.000103455	0.00238486	similar to chromosome X open reading frame 21	http://www.ncbi.nlm.nih.gov/gene/?term=501570
LOC102548282	lncRNA	chr5:150793378-150803158	-	23	47	43	97	71	58	1.0738	1.30253	0.0023155	0.0310882	uncharacterized LOC102548282	http://www.ncbi.nlm.nih.gov/gene/?term=102548282
Lgals3bp	protein_coding	chr10:107415334-107424672	-	1097	1206	1560	2831	2534	2249	1.07269	6.34759	1.39295e-09	1.21324e-07	galectin 3 binding protein	http://www.ncbi.nlm.nih.gov/gene/?term=245955
Sowahc	protein_coding	chr20:28815039-28819505	+	1324	1047	1432	3529	1450	2807	1.07223	6.32736	5.35995e-07	2.65832e-05	sosondowah ankyrin repeat domain family member C	http://www.ncbi.nlm.nih.gov/gene/?term=503306
Cenpk	protein_coding	chr2:34312766-34373917	+	34	26	41	92	49	63	1.07154	1.14404	0.00106811	0.0166978	centromere protein K	http://www.ncbi.nlm.nih.gov/gene/?term=294712
Sh2b2	protein_coding	chr12:23471244-23501043	+	242	234	292	497	495	520	1.07112	4.02436	5.78272e-08	3.53787e-06	SH2B adaptor protein 2	http://www.ncbi.nlm.nih.gov/gene/?term=114203
Lrrn4cl	protein_coding	chr1:225046232-225050963	+	82	57	77	156	126	148	1.07032	2.21334	4.18869e-05	0.00112725	LRRN4 C-terminal like	http://www.ncbi.nlm.nih.gov/gene/?term=690329
Fcgr1a	protein_coding	chr2:198430536-198439453	-	301	203	359	706	459	559	1.06992	4.18656	6.25916e-07	3.01548e-05	Fc fragment of IgG receptor Ia	http://www.ncbi.nlm.nih.gov/gene/?term=295279
Nrcam	protein_coding	chr6:64297888-64864996	+	259	189	217	458	333	542	1.06981	3.82186	1.19633e-06	5.39208e-05	neuronal cell adhesion molecule	http://www.ncbi.nlm.nih.gov/gene/?term=497815
Dok2	protein_coding	chr15:52450150-52455414	+	392	355	590	1101	807	740	1.06978	4.81323	2.30711e-07	1.24177e-05	docking protein 2	http://www.ncbi.nlm.nih.gov/gene/?term=290361
Sgpl1	protein_coding	chr20:30699936-30769178	-	1127	1280	1380	3075	1964	2564	1.06962	6.3213	1.25636e-11	1.72199e-09	sphingosine-1-phosphate lyase 1	http://www.ncbi.nlm.nih.gov/gene/?term=286896
Cd300lf	protein_coding	chr10:103669781-103690577	-	193	193	216	468	332	403	1.06923	3.67568	4.0985e-08	2.62081e-06	Cd300 molecule-like family member F	http://www.ncbi.nlm.nih.gov/gene/?term=287818
Clec12a	protein_coding	chr4:163112100-163130979	+	223	144	297	591	306	439	1.06904	3.80656	2.73192e-05	0.00078097	C-type lectin domain family 12, member A	http://www.ncbi.nlm.nih.gov/gene/?term=680338
Unc93b1	protein_coding	chr1:219173002-219183941	+	1636	1192	2183	3899	2822	3209	1.06834	6.71546	1.81054e-08	1.24561e-06	unc-93 homolog B1 (C. elegans)	http://www.ncbi.nlm.nih.gov/gene/?term=361689
Pak1ip1	protein_coding	chr17:21579987-21591064	-	56	73	91	191	108	143	1.06794	2.23382	9.72411e-05	0.00227574	PAK1 interacting protein 1	http://www.ncbi.nlm.nih.gov/gene/?term=361232
LOC102555173	lncRNA	chr2:225962900-225984199	-	24	32	33	78	39	63	1.06726	0.969636	0.00158734	0.0230237	uncharacterized LOC102555173	http://www.ncbi.nlm.nih.gov/gene/?term=102555173
Arpc1b	protein_coding	chr12:11252300-11265849	-	1350	1052	1968	3377	2503	2749	1.06661	6.51538	4.52593e-08	2.87336e-06	actin related protein 2/3 complex, subunit 1B	http://www.ncbi.nlm.nih.gov/gene/?term=54227
Smpdl3b	protein_coding	chr5:150925150-150946994	-	78	71	83	183	106	177	1.06392	2.31106	4.67816e-05	0.00122943	sphingomyelin phosphodiesterase, acid-like 3B	http://www.ncbi.nlm.nih.gov/gene/?term=362619
Sphk1	protein_coding	chr10:105498728-105504401	+	68	106	119	148	248	162	1.063	2.63448	0.00154077	0.0223941	sphingosine kinase 1	http://www.ncbi.nlm.nih.gov/gene/?term=170897
Csf2ra	protein_coding	chr14:1462358-1467264	+	569	539	733	1354	1044	1240	1.06284	5.2738	2.09738e-10	2.1943e-08	colony stimulating factor 2 receptor alpha subunit	http://www.ncbi.nlm.nih.gov/gene/?term=652957
Jak3	protein_coding	chr16:20107468-20120678	+	553	604	819	1644	1101	1176	1.0625	5.37369	4.78451e-09	3.6941e-07	Janus kinase 3	http://www.ncbi.nlm.nih.gov/gene/?term=25326
Ppil1	protein_coding	chr20:6515638-6864571	-	244	212	254	693	312	435	1.06239	3.90789	3.56585e-06	0.000138707	peptidylprolyl isomerase like 1	http://www.ncbi.nlm.nih.gov/gene/?term=309651
Evi2a	protein_coding	chr10:66870048-66873948	-	314	259	315	816	432	539	1.06103	4.22826	2.38649e-07	1.27865e-05	ecotropic viral integration site 2A	http://www.ncbi.nlm.nih.gov/gene/?term=685433
Gmnn	protein_coding	chr17:42302527-42310783	+	78	82	145	232	178	189	1.06052	2.68614	9.70322e-05	0.00227235	geminin, DNA replication inhibitor	http://www.ncbi.nlm.nih.gov/gene/?term=291137
Aif1l	protein_coding	chr3:9237944-9262628	-	71	58	86	165	129	130	1.0598	2.19609	5.48563e-05	0.00140465	allograft inflammatory factor 1-like	http://www.ncbi.nlm.nih.gov/gene/?term=362107
Lamp3	protein_coding	chr11:84930940-85000694	+	8290	7475	9159	22720	9176	18723	1.05829	9.03026	3.96078e-07	2.01527e-05	lysosomal-associated membrane protein 3	http://www.ncbi.nlm.nih.gov/gene/?term=303801
Sybu	protein_coding	chr7:83600614-83670113	-	136	158	104	411	130	279	1.05543	3.08636	0.000957685	0.0152411	syntabulin	http://www.ncbi.nlm.nih.gov/gene/?term=500865
Prcp	protein_coding	chr1:157701089-157750177	+	1038	751	1143	2329	1494	1991	1.05529	5.93945	2.856e-09	2.33669e-07	prolylcarboxypeptidase	http://www.ncbi.nlm.nih.gov/gene/?term=293118
Gk5	protein_coding	chr8:103929114-104001898	+	54	59	65	145	84	126	1.05457	1.92935	9.68424e-05	0.00226941	glycerol kinase 5 (putative)	http://www.ncbi.nlm.nih.gov/gene/?term=367146
Espl1	protein_coding	chr7:143896898-143923868	+	78	90	153	233	185	209	1.05434	2.75474	9.7653e-05	0.00228236	extra spindle pole bodies like 1, separase	http://www.ncbi.nlm.nih.gov/gene/?term=315330
Tlr10	protein_coding	chr14:45074772-45082230	+	32	20	39	68	52	59	1.0537	0.984692	0.00181418	0.02554	toll-like receptor 10	http://www.ncbi.nlm.nih.gov/gene/?term=305355
Tc2n	protein_coding	chr6:125437767-125601408	-	967	1724	1558	3821	1626	3137	1.05282	6.47628	1.17045e-05	0.000383236	tandem C2 domains, nuclear	http://www.ncbi.nlm.nih.gov/gene/?term=500707
Acss2	protein_coding	chr3:151032884-151075856	+	461	349	563	1329	672	739	1.05173	4.84252	2.29786e-06	9.47052e-05	acyl-CoA synthetase short-chain family member 2	http://www.ncbi.nlm.nih.gov/gene/?term=311569
Ticrr	protein_coding	chr1:141391738-141433615	+	56	69	73	163	104	125	1.04998	2.07639	7.03566e-05	0.00172894	TOPBP1-interacting checkpoint and replication regulator	http://www.ncbi.nlm.nih.gov/gene/?term=308768
Fn1	protein_coding	chr9:78900111-78969015	-	4970	5191	6518	11612	10032	10789	1.04746	8.44106	1.45776e-11	1.95262e-09	fibronectin 1	http://www.ncbi.nlm.nih.gov/gene/?term=25661
Nek6	protein_coding	chr3:22811927-22888598	+	507	527	700	1367	965	1061	1.04432	5.17456	2.04574e-09	1.73898e-07	NIMA-related kinase 6	http://www.ncbi.nlm.nih.gov/gene/?term=360161
LOC103691225	protein_coding	chr1:166911490-166912673	+	45	44	45	72	85	102	1.04251	1.52232	0.000756894	0.0125423	putative uncharacterized protein	http://www.ncbi.nlm.nih.gov/gene/?term=103691225
Apobr	protein_coding	chr1:197999223-198003839	+	706	762	989	1912	1094	1844	1.04181	5.67476	1.64107e-08	1.14914e-06	apolipoprotein B receptor	http://www.ncbi.nlm.nih.gov/gene/?term=499264
Dsn1	protein_coding	chr3:153102273-153115322	-	38	52	73	128	96	93	1.0409	1.78859	0.000579255	0.0100607	DSN1 homolog, MIS12 kinetochore complex component	http://www.ncbi.nlm.nih.gov/gene/?term=499933
Syt7	protein_coding	chr1:226435836-226498009	+	777	1059	1055	2600	1298	1853	1.04036	5.91269	7.75598e-08	4.63289e-06	synaptotagmin 7	http://www.ncbi.nlm.nih.gov/gene/?term=59267
Ifi47	protein_coding	chr10:34277993-34287190	+	629	449	700	1668	817	1042	1.03919	5.20779	9.26542e-07	4.30544e-05	interferon gamma inducible protein 47	http://www.ncbi.nlm.nih.gov/gene/?term=246208
Mb21d1	protein_coding	chr8:85795312-85803610	-	34	30	41	77	58	70	1.03908	1.1768	0.000589639	0.010201	Mab-21 domain containing 1	http://www.ncbi.nlm.nih.gov/gene/?term=682147
Irf8	protein_coding	chr19:54314860-54336643	+	1313	1491	2165	3901	2986	2726	1.03877	6.68389	4.85177e-08	3.05826e-06	interferon regulatory factor 8	http://www.ncbi.nlm.nih.gov/gene/?term=292060
Rasa4	protein_coding	chr12:23596989-23624388	-	94	97	103	240	152	186	1.03817	2.63122	1.22549e-05	0.00039794	RAS p21 protein activator 4	http://www.ncbi.nlm.nih.gov/gene/?term=288589
Atp8b4	protein_coding	chr3:118591560-118976062	-	134	182	220	477	256	324	1.03787	3.48342	1.68246e-05	0.00051511	ATPase phospholipid transporting 8B4 (putative)	http://www.ncbi.nlm.nih.gov/gene/?term=311396
Lrrc25	protein_coding	chr16:20556973-20563772	-	480	444	684	1221	848	1060	1.03685	5.05841	1.45289e-08	1.0296e-06	leucine rich repeat containing 25	http://www.ncbi.nlm.nih.gov/gene/?term=498605
Mfsd11	protein_coding	chr10:105796094-105815696	+	546	565	608	1429	800	1166	1.03656	5.16218	3.16111e-09	2.55797e-07	major facilitator superfamily domain containing 11	http://www.ncbi.nlm.nih.gov/gene/?term=360667
Vav1	protein_coding	chr9:9617551-9675167	-	163	187	259	465	352	363	1.03639	3.66357	2.03507e-06	8.55696e-05	vav guanine nucleotide exchange factor 1	http://www.ncbi.nlm.nih.gov/gene/?term=25156
Tlcd1	protein_coding	chr10:65439104-65441140	+	176	185	187	539	220	338	1.03599	3.52109	3.62237e-05	0.000999176	TLC domain containing 1	http://www.ncbi.nlm.nih.gov/gene/?term=287472
Ptpn7	protein_coding	chr13:51958025-51971438	+	258	229	351	716	468	446	1.03306	4.11961	1.57928e-06	6.86648e-05	protein tyrosine phosphatase, non-receptor type 7	http://www.ncbi.nlm.nih.gov/gene/?term=246781
Nfam1	protein_coding	chr7:123856718-123893792	-	582	631	851	1700	1062	1260	1.03105	5.41548	8.60904e-09	6.35559e-07	NFAT activating protein with ITAM motif 1	http://www.ncbi.nlm.nih.gov/gene/?term=362966
Defb4	protein_coding	chr16:75634598-75637789	-	1821	1611	2021	5143	1854	3904	1.02954	6.81892	5.11795e-06	0.00018774	defensin beta 4	http://www.ncbi.nlm.nih.gov/gene/?term=64389
Adam12	protein_coding	chr1:205951840-206150605	-	145	186	249	269	463	344	1.02846	3.58624	0.00059034	0.0102081	ADAM metallopeptidase domain 12	http://www.ncbi.nlm.nih.gov/gene/?term=679837
LOC102546770	pseudogene	chr20:1334440-1336969	-	32	20	33	52	52	59	1.02634	0.874718	0.00280196	0.0361485	signal peptide peptidase-like 2A-like	http://www.ncbi.nlm.nih.gov/gene/?term=102546770
Gpr35	protein_coding	chr9:100129496-100140673	+	63	45	53	129	94	89	1.02459	1.77024	0.000365159	0.00685754	G protein-coupled receptor 35	http://www.ncbi.nlm.nih.gov/gene/?term=367315
Fxyd5	protein_coding	chr1:89464860-89474252	-	173	104	183	399	248	245	1.02306	3.25508	9.47602e-05	0.00223394	FXYD domain-containing ion transport regulator 5	http://www.ncbi.nlm.nih.gov/gene/?term=60338
Tpst1	protein_coding	chr12:30045753-30112380	-	225	173	248	565	315	378	1.02016	3.74114	3.93365e-06	0.000150611	tyrosylprotein sulfotransferase 1	http://www.ncbi.nlm.nih.gov/gene/?term=288617
Emb	protein_coding	chr2:49682763-49733475	+	417	299	476	1090	573	661	1.01964	4.61881	2.61111e-06	0.000105888	embigin	http://www.ncbi.nlm.nih.gov/gene/?term=114511
Hilpda	protein_coding	chr4:56547598-56550584	+	147	123	130	318	171	294	1.01928	3.06045	2.68914e-05	0.000773745	hypoxia inducible lipid droplet-associated	http://www.ncbi.nlm.nih.gov/gene/?term=100361568
Rbl1	protein_coding	chr3:153263692-153321351	-	48	46	38	118	61	80	1.01877	1.49236	0.00104701	0.0164075	RB transcriptional corepressor like 1	http://www.ncbi.nlm.nih.gov/gene/?term=680111
Trem1	protein_coding	chr9:14727887-14743348	-	93	84	143	299	115	215	1.01815	2.73056	0.000770148	0.0127261	triggering receptor expressed on myeloid cells 1	http://www.ncbi.nlm.nih.gov/gene/?term=301229
Hist2h3c2	protein_coding	chr2:198390109-198418075	+	476	338	568	1019	794	827	1.01749	4.82888	1.65905e-07	9.25351e-06	histone cluster 2, H3c2	http://www.ncbi.nlm.nih.gov/gene/?term=310678
Frem1	protein_coding	chr5:101018009-101166816	-	294	454	329	746	705	603	1.01717	4.48245	3.92376e-06	0.000150611	Fras1 related extracellular matrix 1	http://www.ncbi.nlm.nih.gov/gene/?term=298185
Bid	protein_coding	chr4:153443220-153465247	-	134	89	157	334	185	218	1.01686	2.97674	0.000122403	0.0027482	BH3 interacting domain death agonist	http://www.ncbi.nlm.nih.gov/gene/?term=64625
Spi1	protein_coding	chr3:79918135-79937708	+	902	565	1137	2007	1263	1741	1.01607	5.73676	1.61282e-06	6.99106e-05	serpin family A member 1	http://www.ncbi.nlm.nih.gov/gene/?term=24648
Tlr1	protein_coding	chr14:45062662-45065014	+	96	81	127	226	150	209	1.01559	2.65745	4.55228e-05	0.0012092	toll-like receptor 1	http://www.ncbi.nlm.nih.gov/gene/?term=305354
Psap	protein_coding	chr20:29831302-29856876	+	28073	18754	30615	53574	39711	55128	1.01542	10.6333	2.37684e-08	1.58286e-06	prosaposin	http://www.ncbi.nlm.nih.gov/gene/?term=25524
Fkbp11	protein_coding	chr7:140398253-140402657	-	111	69	69	211	116	160	1.01529	2.38692	0.000503389	0.00894066	FK506 binding protein 11	http://www.ncbi.nlm.nih.gov/gene/?term=300211
Cblc	protein_coding	chr1:80699321-80716146	-	74	77	90	202	107	160	1.01507	2.33159	0.000100311	0.00233214	Cbl proto-oncogene C	http://www.ncbi.nlm.nih.gov/gene/?term=292699
Card14	protein_coding	chr10:108440524-108469012	+	374	512	541	821	887	986	1.01485	4.87751	4.33991e-07	2.1924e-05	caspase recruitment domain family, member 14	http://www.ncbi.nlm.nih.gov/gene/?term=688292
Naaa	protein_coding	chr14:17283262-17302364	+	4741	2613	4393	8915	5096	8773	1.01369	7.91394	2.40687e-06	9.8623e-05	N-acylethanolamine acid amidase	http://www.ncbi.nlm.nih.gov/gene/?term=497009
Msmo1	protein_coding	chr16:26859441-26875880	+	643	658	823	2537	743	954	1.01063	5.44624	0.000614708	0.0105572	methylsterol monooxygenase 1	http://www.ncbi.nlm.nih.gov/gene/?term=140910
Txndc5	protein_coding	chr17:26925828-26953981	+	4567	3448	4237	10515	5960	7273	1.00972	7.9756	7.06081e-09	5.31243e-07	thioredoxin domain containing 5	http://www.ncbi.nlm.nih.gov/gene/?term=100362805
Mcm4	protein_coding	chr11:89511191-89524892	+	451	437	607	1212	742	920	1.00943	4.93736	2.59247e-08	1.71355e-06	minichromosome maintenance complex component 4	http://www.ncbi.nlm.nih.gov/gene/?term=29728
RGD1309362	protein_coding	chr18:55483059-55508714	+	116	75	118	302	188	103	1.00819	2.67884	0.00371003	0.0450839	similar to interferon-inducible GTPase	http://www.ncbi.nlm.nih.gov/gene/?term=307415
Rpl22l1	protein_coding	chr2:115362799-115364735	+	413	428	702	1301	718	946	1.00736	4.97607	2.00698e-06	8.459e-05	ribosomal protein L22 like 1	http://www.ncbi.nlm.nih.gov/gene/?term=361923
Arhgap22	protein_coding	chr16:9456700-9613508	+	468	355	488	930	673	902	1.0069	4.75021	1.78291e-08	1.23139e-06	Rho GTPase activating protein 22	http://www.ncbi.nlm.nih.gov/gene/?term=306279
Tmem256	protein_coding	chr10:56445968-56447138	+	431	314	431	1053	493	743	1.00636	4.59411	2.43356e-06	9.96012e-05	transmembrane protein 256	http://www.ncbi.nlm.nih.gov/gene/?term=287442
Ldha	protein_coding	chr1:102900288-102909713	+	5975	4442	6502	14381	7444	10932	1.00625	8.43432	4.75722e-08	3.00939e-06	lactate dehydrogenase A	http://www.ncbi.nlm.nih.gov/gene/?term=24533
Bcap29	protein_coding	chr6:50883758-50923743	-	246	298	295	754	320	567	1.00587	4.11087	1.1637e-05	0.000381731	B-cell receptor-associated protein 29	http://www.ncbi.nlm.nih.gov/gene/?term=298943
Lcp1	protein_coding	chr15:57176127-57277811	+	13910	9610	14523	31993	17379	24046	1.00455	9.6022	6.64204e-08	4.01497e-06	lymphocyte cytosolic protein 1	http://www.ncbi.nlm.nih.gov/gene/?term=306071
Lrrc59	protein_coding	chr10:82352390-82367047	+	2058	1558	2090	4304	2720	3925	1.00382	6.86734	1.81504e-09	1.55032e-07	leucine rich repeat containing 59	http://www.ncbi.nlm.nih.gov/gene/?term=287633
Tnfrsf18	protein_coding	chr5:173459375-173463977	+	106	98	177	294	193	237	1.00231	2.96587	9.68319e-05	0.00226941	TNF receptor superfamily member 18	http://www.ncbi.nlm.nih.gov/gene/?term=500598
Acp5	protein_coding	chr8:23142733-23149092	-	644	406	715	1035	979	1299	1.0005	5.16997	2.70185e-06	0.000109067	acid phosphatase 5, tartrate resistant	http://www.ncbi.nlm.nih.gov/gene/?term=25732
Ppapdc1a	NA	chr1:202432366-202560628	+	321	203	297	128	97	165	-1.00023	3.08288	0.00012338	0.00276486	phospholipid phosphatase 4	http://www.ncbi.nlm.nih.gov/gene/?term=309014
Klf15	protein_coding	chr4:122365092-122377690	+	1415	1761	1449	384	891	833	-1.00072	5.5702	0.000914417	0.0147114	Kruppel-like factor 15	http://www.ncbi.nlm.nih.gov/gene/?term=85497
LOC102548736	lncRNA	chr2:118366713-118393104	-	361	895	658	219	354	307	-1.00072	4.29851	0.00180031	0.025404	uncharacterized LOC102548736	http://www.ncbi.nlm.nih.gov/gene/?term=102548736
Prdm11	protein_coding	chr3:81869164-81942203	-	465	629	525	180	278	291	-1.00174	4.05976	0.000113865	0.00258439	PR/SET domain 11	http://www.ncbi.nlm.nih.gov/gene/?term=690358
Tmem100	protein_coding	chr10:77537340-77543710	+	12914	10540	12348	5191	4347	7405	-1.00398	8.51498	9.61689e-08	5.63968e-06	transmembrane protein 100	http://www.ncbi.nlm.nih.gov/gene/?term=497979
Wscd1	protein_coding	chr10:58342393-58371199	+	748	769	748	321	345	394	-1.00417	4.54023	1.64909e-07	9.22708e-06	WSC domain containing 1	http://www.ncbi.nlm.nih.gov/gene/?term=287466
Synm	protein_coding	chr1:128692112-128722048	-	10398	9649	9342	4220	3788	5857	-1.00683	8.23268	2.61467e-08	1.72179e-06	synemin	http://www.ncbi.nlm.nih.gov/gene/?term=308709
LOC103691479	NA	chr2:56489499-56493939	+	9070	9779	9199	4339	4246	4536	-1.00768	8.16411	3.16e-10	3.20183e-08	uncharacterized LOC103691479	http://www.ncbi.nlm.nih.gov/gene/?term=103691479
Foxf1	protein_coding	chr19:53012306-53016086	+	3004	4306	3725	1296	1613	2222	-1.00768	6.81828	7.36166e-06	0.000256224	forkhead box I2	http://www.ncbi.nlm.nih.gov/gene/?term=246073
Sox18	protein_coding	chr3:177177237-177179039	-	1826	953	1308	632	553	739	-1.00834	5.38774	7.71404e-06	0.000266391	SRY box 18	http://www.ncbi.nlm.nih.gov/gene/?term=311723
Dnajb13	protein_coding	chr1:165515718-165530163	-	168	300	210	91	118	105	-1.00895	2.81401	0.000841707	0.0136722	DnaJ heat shock protein family (Hsp40) member B13	http://www.ncbi.nlm.nih.gov/gene/?term=308857
Ednrb	protein_coding	chr15:88004775-88036354	-	6110	5765	6175	2814	2350	3324	-1.01145	7.52536	1.72497e-10	1.84286e-08	endothelin receptor type B	http://www.ncbi.nlm.nih.gov/gene/?term=50672
Cyyr1	protein_coding	chr11:24967936-25078740	-	7824	7413	6964	3368	2985	4083	-1.01154	7.82713	1.20964e-09	1.06406e-07	cysteine and tyrosine rich 1	http://www.ncbi.nlm.nih.gov/gene/?term=304138
Erg	protein_coding	chr11:35645317-35749643	-	1166	1168	1192	503	514	627	-1.01182	5.17312	1.97692e-08	1.33667e-06	ERG, ETS transcription factor	http://www.ncbi.nlm.nih.gov/gene/?term=170909
Pcdhac2	NA	chr18:30172740-30215896	+	1942	2282	2017	1034	763	1153	-1.01391	5.99616	2.72935e-09	2.25503e-07	protocadherin alpha 4	http://www.ncbi.nlm.nih.gov/gene/?term=116741
Kdr	protein_coding	chr14:34727677-34787127	+	12703	15927	14999	7235	5643	7627	-1.01584	8.79694	1.47058e-10	1.58838e-08	kinase insert domain receptor	http://www.ncbi.nlm.nih.gov/gene/?term=25589
LOC103690519	NA	chr9:45138735-45146909	+	210	680	497	175	231	230	-1.01696	3.82959	0.00373812	0.0453006	keratin-associated protein 10-6-like	http://www.ncbi.nlm.nih.gov/gene/?term=103690519
Sptbn5	protein_coding	chr3:111833411-111875541	-	186	230	173	84	91	99	-1.0172	2.61247	0.000145364	0.00318092	spectrin, beta, non-erythrocytic 5	http://www.ncbi.nlm.nih.gov/gene/?term=296090
LOC103691449	lncRNA	chr2:38909563-38932763	-	71	58	67	23	34	33	-1.01926	1.05992	0.00352934	0.0433007	uncharacterized LOC103691449	http://www.ncbi.nlm.nih.gov/gene/?term=103691449
Cdh5	protein_coding	chr19:1025122-1074333	-	4032	3858	3943	1813	1574	2134	-1.02114	6.91443	1.86789e-10	1.98355e-08	cadherin 5	http://www.ncbi.nlm.nih.gov/gene/?term=307618
Epas1	protein_coding	chr6:10306508-10385239	+	38219	54541	43589	19095	20241	23774	-1.02115	10.4419	9.86694e-08	5.76718e-06	endothelial PAS domain protein 1	http://www.ncbi.nlm.nih.gov/gene/?term=29452
Sec14l3	protein_coding	chr14:84306466-84317241	+	18987	12353	17355	7662	6930	7992	-1.0219	8.95107	1.34837e-08	9.63257e-07	SEC14-like lipid binding 3	http://www.ncbi.nlm.nih.gov/gene/?term=64543
Cdc42bpg	protein_coding	chr1:221673331-221693518	+	10062	8357	8139	3623	3726	4938	-1.02652	8.08128	4.00903e-08	2.57291e-06	CDC42 binding protein kinase gamma	http://www.ncbi.nlm.nih.gov/gene/?term=293693
LOC103691478	NA	chr2:56429285-56433920	-	496	912	576	280	314	319	-1.02871	4.34684	5.36658e-05	0.00137899	uncharacterized LOC103691478	http://www.ncbi.nlm.nih.gov/gene/?term=103691478
Trank1	protein_coding	chr8:119566509-119644249	+	109	158	167	69	70	60	-1.02958	2.16654	0.0003238	0.00620607	tetratricopeptide repeat and ankyrin repeat containing 1	http://www.ncbi.nlm.nih.gov/gene/?term=316022
Iapp	protein_coding	chr4:176510203-176517903	+	236	642	300	180	203	158	-1.03112	3.60232	0.00293907	0.0376155	islet amyloid polypeptide	http://www.ncbi.nlm.nih.gov/gene/?term=24476
Sipa1l2	protein_coding	chr19:58236201-58399842	-	2117	2208	2056	954	923	1065	-1.0316	6.02248	7.07633e-10	6.60246e-08	signal-induced proliferation-associated 1 like 2	http://www.ncbi.nlm.nih.gov/gene/?term=361442
Aff3	protein_coding	chr9:44837979-45206427	-	887	1573	1214	538	545	606	-1.03236	5.22701	2.61993e-06	0.000106124	AF4/FMR2 family, member 3	http://www.ncbi.nlm.nih.gov/gene/?term=363220
LOC102552794	pseudogene	chr18:15905192-15908979	+	144	92	93	35	44	72	-1.03656	1.78189	0.0040984	0.0487151	proline-rich nuclear receptor coactivator 1-like	http://www.ncbi.nlm.nih.gov/gene/?term=102552794
Kcnma1	protein_coding	chr15:344204-1048849	+	59	71	66	37	33	20	-1.03664	1.05513	0.00271286	0.0352822	potassium calcium-activated channel subfamily M alpha 1	http://www.ncbi.nlm.nih.gov/gene/?term=83731
Npr3	protein_coding	chr2:61883946-61950290	-	4435	3089	3841	1020	1269	2925	-1.03777	6.84978	0.00081367	0.0133147	natriuretic peptide receptor 3	http://www.ncbi.nlm.nih.gov/gene/?term=25339
Anxa8	protein_coding	chr16:10417177-10432388	+	6985	3847	5058	2376	1984	2985	-1.03902	7.33453	1.39658e-06	6.15784e-05	annexin A8	http://www.ncbi.nlm.nih.gov/gene/?term=306283
Eppk1	protein_coding	chr7:117163383-117173730	-	787	1569	835	449	489	525	-1.0395	5.02982	9.41206e-05	0.00222182	epiplakin 1	http://www.ncbi.nlm.nih.gov/gene/?term=680860
Clec1a	protein_coding	chr4:163191503-163214678	-	2353	3218	2705	1228	1212	1348	-1.04003	6.39419	9.16155e-09	6.72138e-07	C-type lectin domain family 1, member A	http://www.ncbi.nlm.nih.gov/gene/?term=500337
Klhl23	protein_coding	chr3:56057043-56070614	+	1381	1334	1369	651	607	611	-1.04139	5.37514	4.51921e-10	4.42682e-08	kelch-like family member 23	http://www.ncbi.nlm.nih.gov/gene/?term=311114
Cyp2f4	protein_coding	chr1:83933974-83947804	+	1853	1596	2416	1137	938	596	-1.04194	5.88695	4.09056e-06	0.000155873	cytochrome P450, family 2, subfamily f, polypeptide 4	http://www.ncbi.nlm.nih.gov/gene/?term=54246
Kcnj3	protein_coding	chr3:41019898-41181070	+	113	77	111	54	42	42	-1.04502	1.6468	0.000440509	0.00804611	potassium voltage-gated channel subfamily J member 3	http://www.ncbi.nlm.nih.gov/gene/?term=50599
Pcdh1	protein_coding	chr18:31329456-31343651	-	2931	2887	2849	1229	1084	1661	-1.04759	6.4575	4.45191e-09	3.45238e-07	protocadherin 1	http://www.ncbi.nlm.nih.gov/gene/?term=307481
RGD1561327	protein_coding	chrX:144258022-144321753	+	92	117	93	52	32	56	-1.04781	1.65623	0.000462651	0.00835411	similar to melanoma antigen family A, 10	http://www.ncbi.nlm.nih.gov/gene/?term=317593
Ankrd23	protein_coding	chr9:43110980-43117585	-	60	90	70	30	32	38	-1.05096	1.21262	0.00180381	0.0254332	ankyrin repeat domain 23	http://www.ncbi.nlm.nih.gov/gene/?term=316330
Mafa	protein_coding	chr7:116779368-116781815	-	93	76	92	49	31	40	-1.05199	1.44627	0.000302478	0.00586737	MAF bZIP transcription factor A	http://www.ncbi.nlm.nih.gov/gene/?term=366949
Gnai1	protein_coding	chr4:13405136-13486866	+	1754	1554	1559	678	680	846	-1.05678	5.62417	4.11458e-09	3.23332e-07	G protein subunit alpha i1	http://www.ncbi.nlm.nih.gov/gene/?term=25686
LOC102549311	lncRNA	chr7:76549286-76598330	+	113	257	175	66	77	103	-1.05697	2.48679	0.00207219	0.0284413	uncharacterized LOC102549311	http://www.ncbi.nlm.nih.gov/gene/?term=102549311
Wfdc1	protein_coding	chr19:52313771-52332721	+	5591	3603	4982	1786	1911	2687	-1.05896	7.15989	5.33017e-07	2.65018e-05	WAP four-disulfide core domain 1	http://www.ncbi.nlm.nih.gov/gene/?term=171112
Cspg4	protein_coding	chr8:61532465-61567510	+	4147	4304	4532	1550	1902	2359	-1.05935	7.03397	5.94779e-08	3.62631e-06	chondroitin sulfate proteoglycan 4	http://www.ncbi.nlm.nih.gov/gene/?term=81651
Ptpru	protein_coding	chr5:149922374-149996351	-	283	376	365	137	164	157	-1.05951	3.3814	1.32489e-05	0.000424372	protein tyrosine phosphatase, receptor type, U	http://www.ncbi.nlm.nih.gov/gene/?term=116680
Aloxe3	protein_coding	chr10:55711999-55735915	+	136	101	143	85	36	55	-1.06031	1.96842	0.000437081	0.0079959	arachidonate lipoxygenase 3	http://www.ncbi.nlm.nih.gov/gene/?term=287424
Ankef1	protein_coding	chr3:129462690-129536423	+	270	254	278	154	126	83	-1.06062	3.03226	4.78908e-05	0.00125167	ankyrin repeat and EF-hand domain containing 1	http://www.ncbi.nlm.nih.gov/gene/?term=296184
LOC102555978	lncRNA	chr4:125044169-125133795	+	386	652	390	199	214	232	-1.06114	3.86615	5.06817e-05	0.00131201	uncharacterized LOC102555978	http://www.ncbi.nlm.nih.gov/gene/?term=102555978
Tmod2	protein_coding	chr8:82505947-82547569	-	210	234	193	94	99	94	-1.06206	2.7086	3.11136e-05	0.000875288	tropomodulin 2	http://www.ncbi.nlm.nih.gov/gene/?term=58814
Pglyrp1	protein_coding	chr1:79790879-79796064	+	117	82	118	47	43	53	-1.06253	1.71385	0.00030564	0.00591686	peptidoglycan recognition protein 1	http://www.ncbi.nlm.nih.gov/gene/?term=84387
LOC103690792	lncRNA	chrX:12882162-12910896	+	62	37	51	24	18	26	-1.06507	0.67773	0.00362149	0.0442055	uncharacterized LOC103690792	http://www.ncbi.nlm.nih.gov/gene/?term=103690792
Pygo1	protein_coding	chr8:79607013-79625188	+	261	234	232	98	81	151	-1.06759	2.89256	5.91458e-05	0.00149075	pygopus family PHD finger 1	http://www.ncbi.nlm.nih.gov/gene/?term=691857
Star	protein_coding	chr16:71036204-71040847	-	61	95	79	46	27	34	-1.07141	1.29608	0.000829214	0.0135127	steroidogenic acute regulatory protein	http://www.ncbi.nlm.nih.gov/gene/?term=25557
Myzap	protein_coding	chr8:78009019-78096411	-	1544	1418	1328	640	528	773	-1.07183	5.43872	2.05521e-09	1.74284e-07	myocardial zonula adherens protein	http://www.ncbi.nlm.nih.gov/gene/?term=363091
Slc43a3	protein_coding	chr3:72328906-72351039	+	3383	2954	3114	1300	1413	1496	-1.07229	6.5742	1.10639e-09	9.78107e-08	solute carrier family 43, member 3	http://www.ncbi.nlm.nih.gov/gene/?term=311170
Adam1a	protein_coding	chr12:40533731-40536632	+	315	392	305	124	172	151	-1.07394	3.36568	4.94943e-05	0.00128692	ADAM metallopeptidase domain 1A	http://www.ncbi.nlm.nih.gov/gene/?term=56777
LOC103693092	lncRNA	chr8:55690301-55715027	+	147	306	211	100	92	106	-1.07495	2.76235	0.000337723	0.00643804	uncharacterized LOC103693092	http://www.ncbi.nlm.nih.gov/gene/?term=103693092
RGD1307443	protein_coding	chr17:42163245-42227360	-	53	53	55	29	16	28	-1.07563	0.771189	0.00130698	0.0195588	similar to mKIAA0319 protein	http://www.ncbi.nlm.nih.gov/gene/?term=361244
Adamtsl2	protein_coding	chr3:5624474-5654890	+	1334	2179	2291	349	1043	1094	-1.07595	5.86344	0.0033189	0.0413256	ADAMTS-like 2	http://www.ncbi.nlm.nih.gov/gene/?term=311827
Efcab8	protein_coding	chr3:149261548-149325905	+	117	137	139	66	49	62	-1.07638	2.01388	3.83921e-05	0.00104998	EF-hand calcium binding domain 8	http://www.ncbi.nlm.nih.gov/gene/?term=499923
Tgfbr3	protein_coding	chr14:3506416-3680508	+	5521	5831	5141	1891	2657	2707	-1.07715	7.3776	2.85675e-07	1.51228e-05	transforming growth factor beta receptor 3	http://www.ncbi.nlm.nih.gov/gene/?term=29610
Oas1k	protein_coding	chr12:41293803-41307352	-	394	223	257	141	121	130	-1.07988	3.15365	5.65874e-05	0.00143857	2 ' -5 ' oligoadenylate synthetase 1K	http://www.ncbi.nlm.nih.gov/gene/?term=494198
LOC102551034	NA	chr9:100323210-100376006	+	474	1218	653	344	393	300	-1.08132	4.57163	0.000482804	0.00864889	None	http://www.ncbi.nlm.nih.gov/gene/?term=LOC102551034
Rapgef4	protein_coding	chr3:58632380-58925127	+	1240	1134	1035	471	436	619	-1.08158	5.10551	1.88829e-08	1.28659e-06	Rap guanine nucleotide exchange factor 4	http://www.ncbi.nlm.nih.gov/gene/?term=252857
Epb41l4b	protein_coding	chr5:74105491-74191167	-	445	533	368	158	203	235	-1.08187	3.77436	2.70066e-05	0.000775798	erythrocyte membrane protein band 4.1 like 4B	http://www.ncbi.nlm.nih.gov/gene/?term=500464
Alpk3	protein_coding	chr1:142883005-142931940	+	457	379	453	184	171	219	-1.0827	3.70311	2.46114e-07	1.31268e-05	alpha-kinase 3	http://www.ncbi.nlm.nih.gov/gene/?term=365298
LOC100910872	NA	chr8:116336441-116339691	+	1240	1343	1099	488	563	574	-1.08593	5.21601	4.38446e-08	2.78855e-06	None	http://www.ncbi.nlm.nih.gov/gene/?term=LOC100910872
Gsn	protein_coding	chr3:14456114-14508922	+	124841	87951	99029	45890	44429	47921	-1.08645	11.6133	1.43448e-09	1.24328e-07	gelsolin	http://www.ncbi.nlm.nih.gov/gene/?term=296654
Gdnf	protein_coding	chr2:56887546-56912964	+	94	101	98	34	37	59	-1.08646	1.59977	0.000617948	0.0105974	glial cell derived neurotrophic factor	http://www.ncbi.nlm.nih.gov/gene/?term=25453
LOC100362748	NA	chr5:172818176-172884996	+	222	393	231	140	145	89	-1.0867	3.1086	0.000559436	0.00977837	None	http://www.ncbi.nlm.nih.gov/gene/?term=LOC100362748
LOC102553352	NA	chr4:62330507-62335883	-	75	106	79	29	36	50	-1.08744	1.43517	0.0015903	0.0230476	mortality factor 4-like protein 1-like	http://www.ncbi.nlm.nih.gov/gene/?term=102553352
Acoxl	protein_coding	chr3:120414395-120724809	+	1838	2069	1871	380	1020	1075	-1.08761	5.86107	0.00095162	0.0151582	acyl-CoA oxidase-like	http://www.ncbi.nlm.nih.gov/gene/?term=296138
Coro2b	protein_coding	chr8:67374617-67492097	-	378	602	513	186	245	220	-1.09019	3.91306	1.65072e-05	0.000507148	coronin 2B	http://www.ncbi.nlm.nih.gov/gene/?term=300768
Ltc4s	protein_coding	chr10:35736486-35742397	-	59	67	84	31	26	36	-1.09093	1.12873	0.000699597	0.0117526	leukotriene C4 synthase	http://www.ncbi.nlm.nih.gov/gene/?term=114097
Cxcl14	protein_coding	chr17:9109731-9117754	+	412	499	588	218	190	254	-1.09415	3.91164	1.37574e-07	7.78385e-06	C-X-C motif chemokine ligand 14	http://www.ncbi.nlm.nih.gov/gene/?term=306748
LOC103692665	lncRNA	chr6:100698008-100715963	-	186	605	377	135	182	192	-1.09488	3.56228	0.00256413	0.0337324	uncharacterized LOC103692665	http://www.ncbi.nlm.nih.gov/gene/?term=103692665
Far2	protein_coding	chr4:182446406-182563472	+	177	123	158	56	70	74	-1.09603	2.22487	0.000171542	0.00363515	fatty acyl CoA reductase 2	http://www.ncbi.nlm.nih.gov/gene/?term=500368
Ace	protein_coding	chr10:94170766-94213831	+	27269	27783	24913	10535	10609	14088	-1.09778	9.64778	7.93025e-10	7.26501e-08	angiotensin I converting enzyme	http://www.ncbi.nlm.nih.gov/gene/?term=24310
Fpgs	protein_coding	chr3:11717667-11729694	-	1137	1394	1115	468	465	677	-1.09816	5.19711	8.68543e-08	5.13946e-06	folylpolyglutamate synthase	http://www.ncbi.nlm.nih.gov/gene/?term=687266
Clstn2	protein_coding	chr8:105322577-106036695	-	1651	1609	1558	714	606	813	-1.09924	5.59565	4.6826e-11	5.51953e-09	calsyntenin 2	http://www.ncbi.nlm.nih.gov/gene/?term=171394
Cyb5r2	protein_coding	chr1:171971424-171980641	-	113	199	129	62	63	69	-1.10118	2.17556	0.000378895	0.00708915	cytochrome b5 reductase 2	http://www.ncbi.nlm.nih.gov/gene/?term=365345
Tshb	protein_coding	chr2:205206457-205214812	-	223	356	290	127	132	121	-1.10157	3.13599	2.06691e-05	0.000614719	thyroid stimulating hormone, beta	http://www.ncbi.nlm.nih.gov/gene/?term=25653
Klhl33	protein_coding	chr15:27811226-27819806	-	66	41	47	33	16	20	-1.10194	0.705266	0.00310238	0.039265	kelch-like family member 33	http://www.ncbi.nlm.nih.gov/gene/?term=100362676
Prss12	protein_coding	chr2:227657983-227717884	+	734	624	626	223	290	350	-1.10242	4.3195	1.77586e-06	7.58624e-05	protease, serine 12	http://www.ncbi.nlm.nih.gov/gene/?term=85266
Lipe	protein_coding	chr1:82248031-82266727	-	1813	1995	1923	698	887	891	-1.10639	5.84227	1.7802e-08	1.23139e-06	lipase E, hormone sensitive type	http://www.ncbi.nlm.nih.gov/gene/?term=25330
LOC103690472	lncRNA	chr8:128811252-128813862	-	65	72	72	41	21	31	-1.10717	1.12096	0.000470772	0.0084763	uncharacterized LOC103690472	http://www.ncbi.nlm.nih.gov/gene/?term=103690472
LOC102547146	protein_coding	chrUn_AABR07024382v1:5770-67823	+	47	78	59	33	24	24	-1.11065	0.946766	0.00165974	0.0238198	uncharacterized LOC102547146	http://www.ncbi.nlm.nih.gov/gene/?term=102547146
Slc6a2	protein_coding	chr19:15391682-15431274	-	171	213	254	67	81	128	-1.11119	2.68536	0.000200752	0.00414904	solute carrier family 6 member 2	http://www.ncbi.nlm.nih.gov/gene/?term=83511
Apln	protein_coding	chrX:134856719-134866210	-	2235	2473	2572	1050	797	1359	-1.11215	6.18274	6.73034e-10	6.32975e-08	apelin	http://www.ncbi.nlm.nih.gov/gene/?term=58812
Abhd15	protein_coding	chr10:62643453-62648844	-	772	880	851	272	376	428	-1.1126	4.64783	7.33365e-07	3.49505e-05	abhydrolase domain containing 15	http://www.ncbi.nlm.nih.gov/gene/?term=303343
LOC102547034	pseudogene	chr18:40704869-40708156	-	285	542	378	128	185	205	-1.11377	3.60175	0.000201596	0.00416162	40S ribosomal protein S23-like	http://www.ncbi.nlm.nih.gov/gene/?term=102547034
F11	protein_coding	chr16:50179458-50201644	+	215	195	186	93	79	89	-1.11432	2.59607	5.0286e-06	0.000185617	coagulation factor XI	http://www.ncbi.nlm.nih.gov/gene/?term=290757
LOC680933	protein_coding	chr8:126965984-126969578	+	119	143	122	62	51	55	-1.11632	1.97251	3.98303e-05	0.00108428	similar to nidogen 2	http://www.ncbi.nlm.nih.gov/gene/?term=680933
LOC102556834	lncRNA	chr14:81088034-81091590	+	41	81	67	25	25	32	-1.11724	0.979176	0.00281399	0.0362905	uncharacterized LOC102556834	http://www.ncbi.nlm.nih.gov/gene/?term=102556834
Pde2a	protein_coding	chr1:166534643-166626158	+	1597	1673	1703	644	693	811	-1.11802	5.63342	4.34753e-10	4.28238e-08	phosphodiesterase 2A	http://www.ncbi.nlm.nih.gov/gene/?term=81743
LOC102551952	lncRNA	chr6:3631239-3639259	+	57	102	68	34	30	35	-1.11953	1.23681	0.00124461	0.0188407	uncharacterized LOC102551952	http://www.ncbi.nlm.nih.gov/gene/?term=102551952
Aox1	protein_coding	chr9:64929679-65007872	+	1287	1167	1194	464	540	565	-1.11981	5.18848	5.23182e-09	4.03067e-07	aldehyde oxidase 1	http://www.ncbi.nlm.nih.gov/gene/?term=54349
Gp1ba	protein_coding	chr10:57260680-57263546	+	68	161	99	57	40	47	-1.12157	1.75103	0.00165001	0.0237475	glycoprotein Ib platelet alpha subunit	http://www.ncbi.nlm.nih.gov/gene/?term=691992
LOC103693742	lncRNA	chr14:33943116-33944185	+	160	543	320	123	149	168	-1.12184	3.3653	0.00250107	0.0330627	homeodomain-only protein pseudogene	http://www.ncbi.nlm.nih.gov/gene/?term=103693742
Ptprb	protein_coding	chr7:59326488-59431114	+	50042	46117	45737	19149	17838	24447	-1.12637	10.4647	3.58054e-11	4.32278e-09	protein tyrosine phosphatase, receptor type, B	http://www.ncbi.nlm.nih.gov/gene/?term=314843
Hecw2	protein_coding	chr9:60451476-60672246	-	3231	2950	2835	947	1275	1628	-1.12729	6.49055	3.19309e-07	1.66295e-05	HECT, C2 and WW domain containing E3 ubiquitin protein ligase 2	http://www.ncbi.nlm.nih.gov/gene/?term=316395
Serpinb7	protein_coding	chr13:27282456-27354775	+	64	38	70	32	17	26	-1.1284	0.841027	0.0019507	0.0270831	serpin family B member 7	http://www.ncbi.nlm.nih.gov/gene/?term=117092
Spon2	protein_coding	chr14:82818735-82824529	+	1162	1131	1301	553	455	546	-1.12954	5.15986	4.17218e-12	6.41464e-10	spondin 2	http://www.ncbi.nlm.nih.gov/gene/?term=171569
Cped1	protein_coding	chr4:49055988-49333729	+	5974	5260	4904	2059	2102	2794	-1.12975	7.33015	1.09371e-09	9.69314e-08	cadherin-like and PC-esterase domain containing 1	http://www.ncbi.nlm.nih.gov/gene/?term=500046
LOC102554007	lncRNA	chr9:88380712-88390178	-	537	1704	896	277	554	483	-1.13093	4.97363	0.0029881	0.0380501	uncharacterized LOC102554007	http://www.ncbi.nlm.nih.gov/gene/?term=102554007
Gal3st3	protein_coding	chr1:220668544-220678300	+	308	365	346	108	96	238	-1.13211	3.35263	0.000242535	0.00486474	galactose-3-O-sulfotransferase 3	http://www.ncbi.nlm.nih.gov/gene/?term=499302
Rgs6	protein_coding	chr6:106310442-106598668	+	484	604	466	235	225	208	-1.13404	3.96124	1.36596e-07	7.74089e-06	regulator of G-protein signaling 6	http://www.ncbi.nlm.nih.gov/gene/?term=54295
Trim63	protein_coding	chr5:152533362-152547138	+	133	114	135	73	42	51	-1.13867	1.9539	2.78268e-05	0.000794841	tripartite motif containing 63	http://www.ncbi.nlm.nih.gov/gene/?term=140939
Kl	protein_coding	chr12:942974-987206	+	1728	1478	1641	416	654	975	-1.13928	5.58979	2.05746e-05	0.00061258	Klotho	http://www.ncbi.nlm.nih.gov/gene/?term=83504
Hyal2	protein_coding	chr8:116324037-116328978	+	6772	4752	5465	1692	2549	2880	-1.14414	7.39739	1.48563e-06	6.52607e-05	hyaluronoglucosaminidase 2	http://www.ncbi.nlm.nih.gov/gene/?term=64468
Akr1c19	protein_coding	chr17:69653368-69675204	+	505	586	587	249	195	277	-1.14425	4.0622	2.59957e-09	2.15789e-07	aldo-keto reductase family 1, member C19	http://www.ncbi.nlm.nih.gov/gene/?term=307096
Slco1a5	protein_coding	chr4:176445856-176528117	-	435	830	506	235	263	254	-1.14471	4.14744	1.65021e-05	0.000507148	solute carrier organic anion transporter family, member 1a5	http://www.ncbi.nlm.nih.gov/gene/?term=80900
LOC102555045	NA	chr14:72474403-72510362	+	88	111	116	33	36	65	-1.14498	1.68043	0.000561717	0.00979943	uncharacterized LOC102555045	http://www.ncbi.nlm.nih.gov/gene/?term=102555045
Gsg1l	protein_coding	chr1:197271704-197482622	-	84	101	65	41	22	46	-1.14602	1.36615	0.000808417	0.0132348	GSG1-like	http://www.ncbi.nlm.nih.gov/gene/?term=499263
LOC103690533	lncRNA	chr9:55475994-55484809	+	238	408	240	120	122	136	-1.1474	3.156	5.07676e-05	0.00131327	uncharacterized LOC103690533	http://www.ncbi.nlm.nih.gov/gene/?term=103690533
Tmem204	protein_coding	chr10:14417608-14443010	-	3865	3171	3383	1445	1288	1712	-1.14935	6.69075	1.22636e-11	1.68742e-09	transmembrane protein 204	http://www.ncbi.nlm.nih.gov/gene/?term=287129
LOC690085	NA	chr12:38659294-38691450	-	163	214	165	62	77	90	-1.14996	2.45163	6.56955e-05	0.0016257	None	http://www.ncbi.nlm.nih.gov/gene/?term=LOC690085
Efnb2	protein_coding	chr16:86631151-86672050	+	3396	3325	3277	1334	1297	1614	-1.15044	6.63089	5.93152e-12	8.7396e-10	ephrin B2	http://www.ncbi.nlm.nih.gov/gene/?term=306636
Eng	protein_coding	chr3:11679530-11717485	+	13457	15200	14067	4948	5487	7633	-1.15084	8.72501	3.65804e-09	2.91999e-07	endoglin	http://www.ncbi.nlm.nih.gov/gene/?term=497010
LOC102549774	NA	chr5:146091539-146226815	+	34	42	41	18	12	20	-1.15175	0.315233	0.00209796	0.0286444	uncharacterized LOC102549774	http://www.ncbi.nlm.nih.gov/gene/?term=102549774
Il1a	protein_coding	chr3:121824712-121836122	-	459	1231	853	182	333	548	-1.15177	4.65944	0.00269223	0.0351171	interleukin 1 alpha	http://www.ncbi.nlm.nih.gov/gene/?term=24493
Sdr9c7	protein_coding	chr7:71152400-71169510	+	548	622	734	248	234	321	-1.15757	4.23569	1.15918e-08	8.46922e-07	short chain dehydrogenase/reductase family 9C, member 7	http://www.ncbi.nlm.nih.gov/gene/?term=259235
Tubb4a	protein_coding	chr9:9961020-9968420	+	130	57	139	40	51	44	-1.15793	1.71791	0.00219223	0.0297246	tubulin, beta 4A class IVa	http://www.ncbi.nlm.nih.gov/gene/?term=29213
Kcnip3	protein_coding	chr3:120023062-120087157	-	497	663	467	177	264	235	-1.15907	4.02089	1.0042e-05	0.000336911	potassium voltage-gated channel interacting protein 3	http://www.ncbi.nlm.nih.gov/gene/?term=65199
Zfp483	protein_coding	chr5:76090015-76103051	+	138	122	89	53	49	46	-1.1603	1.83007	0.000155313	0.00335502	zinc finger protein 483	http://www.ncbi.nlm.nih.gov/gene/?term=170955
Pdzd2	protein_coding	chr2:62399748-62520448	-	7090	9897	7419	3096	3350	3809	-1.16091	7.91758	2.8345e-09	2.3256e-07	PDZ domain containing 2	http://www.ncbi.nlm.nih.gov/gene/?term=65034
Fam222a	protein_coding	chr12:47742449-47793534	-	186	401	263	78	109	169	-1.16109	3.08849	0.000926662	0.0148476	family with sequence similarity 222, member A	http://www.ncbi.nlm.nih.gov/gene/?term=498193
Dscaml1	protein_coding	chr8:49737758-50056113	+	87	122	92	49	51	26	-1.1621	1.61728	0.00104722	0.0164075	DS cell adhesion molecule-like 1	http://www.ncbi.nlm.nih.gov/gene/?term=315615
Cav1	protein_coding	chr4:44597123-44630206	+	29490	21105	23441	10010	9071	12222	-1.16218	9.51538	2.04725e-10	2.16104e-08	caveolin 1	http://www.ncbi.nlm.nih.gov/gene/?term=25404
Ttll10	protein_coding	chr5:173471020-173517785	-	115	283	178	91	82	70	-1.16296	2.5339	0.000611627	0.0105145	tubulin tyrosine ligase like 10	http://www.ncbi.nlm.nih.gov/gene/?term=298692
Mapt	protein_coding	chr10:92288962-92386517	+	3107	3898	3282	1144	1436	1709	-1.16348	6.66929	1.86909e-08	1.27596e-06	microtubule-associated protein tau	http://www.ncbi.nlm.nih.gov/gene/?term=29477
Rorb	protein_coding	chr1:234252757-234442597	+	252	383	309	124	118	156	-1.16398	3.2354	3.54805e-06	0.000138375	RAR-related orphan receptor B	http://www.ncbi.nlm.nih.gov/gene/?term=309288
LOC103690116	protein_coding	chr17:14635588-14646354	-	84	73	68	37	32	26	-1.16399	1.21056	0.000310177	0.00598064	osteomodulin	http://www.ncbi.nlm.nih.gov/gene/?term=103690116
Spef2	protein_coding	chr2:58901937-59084202	-	43	49	56	17	27	17	-1.1644	0.62787	0.00296498	0.0378355	sperm flagellar 2	http://www.ncbi.nlm.nih.gov/gene/?term=64555
Smad6	protein_coding	chr8:68897746-68967219	-	9265	9139	9351	2434	3378	5749	-1.16615	8.09706	7.17109e-06	0.000250577	SMAD family member 6	http://www.ncbi.nlm.nih.gov/gene/?term=367100
Hpgd	protein_coding	chr16:37457134-37495758	-	469	293	394	194	140	156	-1.16641	3.52159	5.67473e-07	2.79874e-05	hydroxyprostaglandin dehydrogenase 15 (NAD)	http://www.ncbi.nlm.nih.gov/gene/?term=79242
Ccdc3	protein_coding	chr17:76991722-77093522	-	638	735	681	187	283	380	-1.16828	4.34731	7.90974e-06	0.000272086	coiled-coil domain containing 3	http://www.ncbi.nlm.nih.gov/gene/?term=498795
Ttll3	protein_coding	chr4:145342154-145366083	+	153	355	194	111	99	85	-1.17279	2.81577	0.00041382	0.00763754	tubulin tyrosine ligase like 3	http://www.ncbi.nlm.nih.gov/gene/?term=362415
LOC100910163	protein_coding	chr16:72401521-72403180	+	129	91	95	50	35	48	-1.1762	1.67633	8.79193e-05	0.00208986	uncharacterized LOC100910163	http://www.ncbi.nlm.nih.gov/gene/?term=100910163
LOC102556346	protein_coding	chr10:94082852-94085544	+	5342	6108	5156	2068	2047	2820	-1.17699	7.35632	1.46702e-10	1.58838e-08	angiotensin-converting enzyme-like	http://www.ncbi.nlm.nih.gov/gene/?term=102556346
Oc90	protein_coding	chr7:106617491-106697089	-	42	33	40	13	12	23	-1.17723	0.284886	0.00310911	0.039322	otoconin 90	http://www.ncbi.nlm.nih.gov/gene/?term=690625
Atp1b4	protein_coding	chrX:124631543-124652520	+	216	168	183	85	67	86	-1.17844	2.50421	2.89255e-06	0.000115839	ATPase Na+/K+ transporting family member beta 4	http://www.ncbi.nlm.nih.gov/gene/?term=84396
Gpr116	NA	chr9:20091121-20195708	-	43481	41981	36570	16866	14340	19976	-1.18024	10.2331	4.05193e-12	6.2844e-10	adhesion G protein-coupled receptor F5	http://www.ncbi.nlm.nih.gov/gene/?term=245977
LOC102549342	lncRNA	chr1:82318782-82404554	+	47	56	33	20	17	20	-1.18128	0.517878	0.00251503	0.0332079	uncharacterized LOC102549342	http://www.ncbi.nlm.nih.gov/gene/?term=102549342
LOC103693504	NA	chr11:9852583-9858298	+	44	86	54	28	22	27	-1.18399	0.927583	0.00166042	0.0238198	cell wall protein DAN4-like	http://www.ncbi.nlm.nih.gov/gene/?term=103693504
LOC102546975	lncRNA	chr4:728514-735900	+	408	1054	758	243	295	375	-1.18501	4.45349	0.000105807	0.00243114	uncharacterized LOC102546975	http://www.ncbi.nlm.nih.gov/gene/?term=102546975
Tek	protein_coding	chr5:113725717-113852799	+	22015	15233	16190	7309	5988	9052	-1.18659	9.03912	7.45551e-10	6.91973e-08	TEK receptor tyrosine kinase	http://www.ncbi.nlm.nih.gov/gene/?term=89804
RGD1565512	NA	chr3:3724656-3747440	-	242	543	276	153	182	99	-1.18882	3.40231	0.000779892	0.0128571	coiled-coil domain containing 187	http://www.ncbi.nlm.nih.gov/gene/?term=499759
Trim66	protein_coding	chr1:174064074-174131401	-	93	157	68	60	33	42	-1.19151	1.69458	0.00133667	0.0199439	tripartite motif-containing 66	http://www.ncbi.nlm.nih.gov/gene/?term=361623
Kcnh6	protein_coding	chr10:94207336-94228236	+	109	67	77	25	24	56	-1.1928	1.36464	0.00242575	0.0322479	potassium voltage-gated channel subfamily H member 6	http://www.ncbi.nlm.nih.gov/gene/?term=116745
Nxpe2	protein_coding	chr8:60333201-60359944	-	65	75	86	24	40	27	-1.1935	1.20175	0.00103087	0.0162089	neurexophilin and PC-esterase domain family, member 2	http://www.ncbi.nlm.nih.gov/gene/?term=100363350
Mettl24	protein_coding	chr20:48586322-48706793	-	229	237	240	120	76	99	-1.19411	2.80943	2.29577e-07	1.23755e-05	methyltransferase like 24	http://www.ncbi.nlm.nih.gov/gene/?term=499465
LOC103693415	lncRNA	chr10:77552139-77577645	+	493	492	542	190	170	271	-1.19459	3.91096	2.82346e-08	1.84895e-06	uncharacterized LOC103693415	http://www.ncbi.nlm.nih.gov/gene/?term=103693415
Lifr	protein_coding	chr2:56424918-56489346	+	12940	13770	12570	5584	4994	5567	-1.20129	8.58931	1.13898e-14	2.70314e-12	leukemia inhibitory factor receptor alpha	http://www.ncbi.nlm.nih.gov/gene/?term=81680
LOC102555068	NA	chr3:68438457-68440294	-	51	48	45	20	20	19	-1.20151	0.58504	0.000694554	0.0116845	igE-binding protein-like	http://www.ncbi.nlm.nih.gov/gene/?term=102555068
Krt80	protein_coding	chr7:142995715-143015932	-	151	180	157	57	61	81	-1.20789	2.28363	1.29514e-05	0.000416732	keratin 80	http://www.ncbi.nlm.nih.gov/gene/?term=315318
LOC102550353	lncRNA	chr7:77105897-77114159	+	112	56	65	46	23	28	-1.21336	1.24616	0.00138899	0.0205426	uncharacterized LOC102550353	http://www.ncbi.nlm.nih.gov/gene/?term=102550353
LOC103692951	lncRNA	chr7:123607638-123614643	+	72	110	74	27	30	47	-1.21685	1.37639	0.000702772	0.0117891	uncharacterized LOC103692951	http://www.ncbi.nlm.nih.gov/gene/?term=103692951
Sorcs3	protein_coding	chr1:267986305-268620331	+	58	56	53	32	14	23	-1.21951	0.780981	0.000399845	0.00743002	sortilin-related VPS10 domain containing receptor 3	http://www.ncbi.nlm.nih.gov/gene/?term=294043
LOC102546416	lncRNA	chr13:93052982-93096064	+	27	32	34	14	7	17	-1.22044	-0.0106637	0.00350803	0.0431332	uncharacterized LOC102546416	http://www.ncbi.nlm.nih.gov/gene/?term=102546416
LOC102553951	NA	chr13:52359628-52367485	+	45	99	56	24	25	32	-1.22176	1.03295	0.00236229	0.0315943	uncharacterized LOC102553951	http://www.ncbi.nlm.nih.gov/gene/?term=102553951
Hey2	protein_coding	chr1:29191170-29201257	+	301	156	197	97	80	89	-1.22231	2.69583	3.04833e-05	0.000859609	hes-related family bHLH transcription factor with YRPW motif 2	http://www.ncbi.nlm.nih.gov/gene/?term=155430
Mmp8	protein_coding	chr8:5768808-5777741	+	444	219	459	134	190	116	-1.22236	3.45452	0.00017157	0.00363515	matrix metallopeptidase 8	http://www.ncbi.nlm.nih.gov/gene/?term=63849
Chrng	protein_coding	chr9:94302218-94308591	+	33	38	42	22	13	11	-1.22255	0.247328	0.00190356	0.0265537	cholinergic receptor nicotinic gamma subunit	http://www.ncbi.nlm.nih.gov/gene/?term=25753
LOC102550887	NA	chr1:218569544-218574050	+	89	297	150	57	87	68	-1.22801	2.41489	0.00361039	0.0441157	uncharacterized LOC102550887	http://www.ncbi.nlm.nih.gov/gene/?term=102550887
Lims2	protein_coding	chr18:24707940-24746159	+	2683	1992	2351	589	997	1183	-1.22812	6.09772	2.31979e-06	9.54975e-05	LIM zinc finger domain containing 2	http://www.ncbi.nlm.nih.gov/gene/?term=361303
Col4a3	protein_coding	chr9:88357531-88484735	+	6744	7273	6228	2183	2712	3181	-1.22832	7.62678	8.471e-10	7.70909e-08	collagen type IV alpha 3 chain	http://www.ncbi.nlm.nih.gov/gene/?term=363265
Vangl2	protein_coding	chr13:90379203-90405616	-	320	381	362	153	127	149	-1.23106	3.38327	8.38083e-09	6.20006e-07	VANGL planar cell polarity protein 2	http://www.ncbi.nlm.nih.gov/gene/?term=289229
Sphkap	protein_coding	chr9:89050405-89195445	-	402	452	542	180	185	191	-1.23234	3.76811	6.7468e-09	5.087e-07	SPHK1 interactor, AKAP domain containing	http://www.ncbi.nlm.nih.gov/gene/?term=316561
Kcnk2	protein_coding	chr13:107690111-107886476	-	81	133	97	42	40	43	-1.23248	1.64237	0.000102187	0.0023686	potassium two pore domain channel subfamily K member 2	http://www.ncbi.nlm.nih.gov/gene/?term=170899
LOC102555860	lncRNA	chr4:125147312-125164319	+	555	1267	697	290	355	359	-1.23257	4.62807	2.40627e-05	0.000701489	uncharacterized LOC102555860	http://www.ncbi.nlm.nih.gov/gene/?term=102555860
RGD1564567	NA	chr14:81685470-81725168	-	428	1012	618	307	274	247	-1.23323	4.33479	1.18898e-05	0.000387865	cilia and flagella associated protein 99	http://www.ncbi.nlm.nih.gov/gene/?term=305453
LOC100910839	NA	chr1:112033664-113531330	+	58	59	36	28	11	24	-1.2373	0.66335	0.00195845	0.0271693	None	http://www.ncbi.nlm.nih.gov/gene/?term=LOC100910839
LOC102552728	lncRNA	chr1:21119676-21125915	-	64	112	82	26	37	39	-1.2385	1.37865	0.000679728	0.0114733	uncharacterized LOC102552728	http://www.ncbi.nlm.nih.gov/gene/?term=102552728
Rgs7	protein_coding	chr13:93095659-93534452	-	52	57	55	19	14	33	-1.24006	0.74975	0.000797731	0.0131024	regulator of G-protein signaling 7	http://www.ncbi.nlm.nih.gov/gene/?term=54296
Sema3g	protein_coding	chr16:7303582-7315214	+	11978	11279	11236	3990	3894	5906	-1.24016	8.38936	3.58174e-11	4.32278e-09	semaphorin 3G	http://www.ncbi.nlm.nih.gov/gene/?term=290562
LOC100912071	lncRNA	chr1:165181861-165190771	-	107	192	138	69	50	57	-1.24263	2.1179	4.00882e-05	0.00108899	uncharacterized LOC100912071	http://www.ncbi.nlm.nih.gov/gene/?term=100912071
LOC102551750	lncRNA	chr16:23208996-23217552	-	29	28	34	13	13	10	-1.24424	-0.0458885	0.00267344	0.0349236	uncharacterized LOC102551750	http://www.ncbi.nlm.nih.gov/gene/?term=102551750
PCOLCE2	protein_coding	chr8:103459219-103484557	+	952	661	789	290	293	371	-1.24512	4.54877	2.79339e-09	2.29721e-07	procollagen C-endopeptidase enhancer 2	http://www.ncbi.nlm.nih.gov/gene/?term=684050
Sox9	protein_coding	chr10:101288354-101294030	+	88	115	89	30	42	43	-1.24616	1.55076	0.000167376	0.00356122	SRY box 9	http://www.ncbi.nlm.nih.gov/gene/?term=140586
Corin	protein_coding	chr14:38247388-38474931	+	142	192	239	106	62	62	-1.24782	2.48954	1.09443e-05	0.00036237	corin, serine peptidase	http://www.ncbi.nlm.nih.gov/gene/?term=289596
LOC103693294	NA	chr10:16973985-16975410	+	418	308	281	101	120	178	-1.24934	3.30646	1.23225e-05	0.000399445	uncharacterized LOC103693294	http://www.ncbi.nlm.nih.gov/gene/?term=103693294
LOC100909413	NA	chr6:14665986-14668125	-	32	78	50	24	17	23	-1.25123	0.71541	0.00240027	0.0319746	alpha-enolase-like	http://www.ncbi.nlm.nih.gov/gene/?term=100909413
Abcb1a	protein_coding	chr4:22339829-22517646	-	144	143	89	37	52	59	-1.25307	1.90965	0.000282736	0.00553912	ATP binding cassette subfamily B member 1A	http://www.ncbi.nlm.nih.gov/gene/?term=170913
LOC102550644	lncRNA	chr4:44419863-44572546	-	222	414	284	121	104	141	-1.25502	3.17358	5.63858e-06	0.000205346	uncharacterized LOC102550644	http://www.ncbi.nlm.nih.gov/gene/?term=102550644
Ppargc1a	protein_coding	chr14:63095291-63190688	+	305	433	355	150	161	117	-1.25655	3.41781	1.01457e-06	4.68985e-05	PPARG coactivator 1 alpha	http://www.ncbi.nlm.nih.gov/gene/?term=83516
Esrrb	protein_coding	chr6:110300942-110456061	+	86	51	51	29	21	25	-1.25659	0.937254	0.00066368	0.0112596	estrogen-related receptor beta	http://www.ncbi.nlm.nih.gov/gene/?term=299210
Susd2	protein_coding	chr20:13965101-13972547	+	1681	1166	1370	482	495	681	-1.26015	5.35414	1.42864e-09	1.24126e-07	sushi domain containing 2	http://www.ncbi.nlm.nih.gov/gene/?term=294335
RGD1562143	pseudogene	chr9:52484188-52485652	+	144	197	231	54	96	68	-1.26059	2.48512	0.000135445	0.00299537	similar to Ctps protein	http://www.ncbi.nlm.nih.gov/gene/?term=299504
LOC103691927	NA	chr3:145603763-145611806	-	49	76	49	25	20	24	-1.26102	0.829617	0.00053274	0.0093632	uncharacterized LOC103691927	http://www.ncbi.nlm.nih.gov/gene/?term=103691927
Xkr4	protein_coding	chr5:15746012-16141059	-	587	665	535	238	201	267	-1.26647	4.12147	3.12823e-10	3.18104e-08	XK related 4	http://www.ncbi.nlm.nih.gov/gene/?term=297801
Ehd3	protein_coding	chr6:25076012-25102457	+	4367	3809	4104	1397	1619	1747	-1.26777	6.89099	4.0794e-12	6.29938e-10	EH-domain containing 3	http://www.ncbi.nlm.nih.gov/gene/?term=192249
Prx	protein_coding	chr1:84302912-84324560	+	9399	9404	9399	2873	3710	4322	-1.26797	8.08997	2.0786e-10	2.18112e-08	periaxin	http://www.ncbi.nlm.nih.gov/gene/?term=78960
Plvap	protein_coding	chr16:19906354-19918668	-	15721	10010	12545	4404	4042	6539	-1.27379	8.52877	2.38505e-09	2.00333e-07	plasmalemma vesicle associated protein	http://www.ncbi.nlm.nih.gov/gene/?term=56765
Sult1a1	protein_coding	chr1:198100586-198104106	-	1643	1365	1733	445	575	804	-1.27625	5.51366	1.86182e-08	1.27346e-06	sulfotransferase family 1A member 1	http://www.ncbi.nlm.nih.gov/gene/?term=83783
Slc25a33	protein_coding	chr5:166701463-166726794	-	397	606	429	170	172	216	-1.27685	3.80133	1.50875e-07	8.48211e-06	solute carrier family 25 member 33	http://www.ncbi.nlm.nih.gov/gene/?term=691431
LOC103694441	NA	chr20:44688757-44692623	-	32	84	69	25	21	26	-1.2779	0.902365	0.00186652	0.0261294	uncharacterized LOC103694441	http://www.ncbi.nlm.nih.gov/gene/?term=103694441
LOC103694221	NA	chr18:50019432-50024513	-	55	120	59	23	35	32	-1.27812	1.23669	0.00260356	0.0341369	uncharacterized LOC103694221	http://www.ncbi.nlm.nih.gov/gene/?term=103694221
LOC102549662	lncRNA	chr3:142426924-142475305	+	59	45	62	26	16	23	-1.27919	0.752122	0.000189168	0.00394956	uncharacterized LOC102549662	http://www.ncbi.nlm.nih.gov/gene/?term=102549662
Cntn1	protein_coding	chr7:133400485-133588314	+	1029	704	619	368	315	234	-1.28199	4.51489	2.18046e-07	1.18441e-05	contactin 1	http://www.ncbi.nlm.nih.gov/gene/?term=117258
LOC103692676	lncRNA	chr6:106588998-106597790	-	264	796	484	201	219	174	-1.28236	3.90669	0.000135692	0.00299895	uncharacterized LOC103692676	http://www.ncbi.nlm.nih.gov/gene/?term=103692676
Rpl10l	protein_coding	chr6:88231273-88232544	-	102	83	175	56	54	27	-1.28283	1.8161	0.00070923	0.0118805	ribosomal protein L10-like	http://www.ncbi.nlm.nih.gov/gene/?term=299106
Prkag3	protein_coding	chr9:81999368-82008663	-	38	53	29	13	10	24	-1.28527	0.320319	0.00409358	0.0486743	protein kinase AMP-activated non-catalytic subunit gamma 3	http://www.ncbi.nlm.nih.gov/gene/?term=301518
LOC102546303	lncRNA	chr16:86446741-86466153	+	166	255	210	70	77	96	-1.28695	2.62455	4.85832e-06	0.000180842	uncharacterized LOC102546303	http://www.ncbi.nlm.nih.gov/gene/?term=102546303
LOC102553541	lncRNA	chr1:211271509-211277625	+	73	58	77	13	31	34	-1.29248	1.0586	0.00160817	0.0232399	uncharacterized LOC102553541	http://www.ncbi.nlm.nih.gov/gene/?term=102553541
Kcnj4	protein_coding	chr7:120717378-120744602	-	208	205	235	70	67	112	-1.29611	2.656	1.44228e-06	6.34353e-05	potassium voltage-gated channel subfamily J member 4	http://www.ncbi.nlm.nih.gov/gene/?term=116649
Dlec1	protein_coding	chr8:127789011-127835905	+	322	767	414	196	231	144	-1.29613	3.86815	9.03019e-05	0.00214312	deleted in lung and esophageal cancer 1	http://www.ncbi.nlm.nih.gov/gene/?term=501070
Serpina1	protein_coding	chr6:127610241-127632265	-	481	318	382	112	147	190	-1.29704	3.51592	2.24918e-06	9.3024e-05	serpin family A member 1	http://www.ncbi.nlm.nih.gov/gene/?term=24648
LOC100362422	NA	chr10:92816083-92942915	+	48	72	68	22	21	29	-1.29876	0.919559	0.00019331	0.00402343	None	http://www.ncbi.nlm.nih.gov/gene/?term=LOC100362422
LOC501349	protein_coding	chr19:26515875-26537622	-	33	33	31	14	14	9	-1.2998	0.0269689	0.0020598	0.0283309	hypothetical LOC501349	http://www.ncbi.nlm.nih.gov/gene/?term=501349
Lingo1	protein_coding	chr8:61273344-61308133	-	112	139	108	24	60	49	-1.30374	1.82376	0.000796603	0.0130899	leucine rich repeat and Ig domain containing 1	http://www.ncbi.nlm.nih.gov/gene/?term=315691
RGD1565695	pseudogene	chr1:251599674-251600895	-	31	67	52	23	13	22	-1.30453	0.610115	0.00137338	0.0203373	similar to Aldo-keto reductase family 1, member B8	http://www.ncbi.nlm.nih.gov/gene/?term=294101
2020-03-10	protein_coding	chr10:93591187-93681486	-	56	120	73	31	32	32	-1.30455	1.31296	0.000570622	0.00993517	membrane associated ring-CH-type finger 10	http://www.ncbi.nlm.nih.gov/gene/?term=303596
LOC103694129	NA	chr17:76989072-76992025	+	124	168	112	37	59	56	-1.3061	1.99266	0.0001226	0.00275088	uncharacterized LOC103694129	http://www.ncbi.nlm.nih.gov/gene/?term=103694129
T2	protein_coding	chr1:52907435-52962388	-	64	161	81	41	39	37	-1.30744	1.60288	0.000852597	0.0138174	brachyury 2	http://www.ncbi.nlm.nih.gov/gene/?term=681288
Ramp2	protein_coding	chr10:89167183-89168962	+	5455	4621	4918	1789	1549	2404	-1.30842	7.16761	3.82357e-13	7.11627e-11	receptor activity modifying protein 2	http://www.ncbi.nlm.nih.gov/gene/?term=58966
LOC100909795	protein_coding	chr18:78550210-78577178	+	29	82	43	22	17	20	-1.31229	0.649166	0.00372163	0.0451782	colorectal mutant cancer protein-like	http://www.ncbi.nlm.nih.gov/gene/?term=100909795
Hey1	protein_coding	chr2:95320283-95322701	+	716	442	548	208	213	223	-1.31586	4.03777	1.21193e-08	8.80002e-07	hes-related family bHLH transcription factor with YRPW motif 1	http://www.ncbi.nlm.nih.gov/gene/?term=155437
Tmem229a	protein_coding	chr4:52345605-52350624	-	60	58	54	18	19	28	-1.31932	0.795198	0.000167737	0.00356462	transmembrane protein 229A	http://www.ncbi.nlm.nih.gov/gene/?term=685756
LOC100911572	protein_coding	chr9:90856896-90877771	+	2835	3127	2776	992	946	1364	-1.32314	6.38666	8.03826e-13	1.42125e-10	collagen alpha-3(IV) chain-like	http://www.ncbi.nlm.nih.gov/gene/?term=100911572
Clec14a	protein_coding	chr6:79303301-79306443	-	12623	12754	12385	4182	3830	6263	-1.32519	8.49502	2.95638e-12	4.73048e-10	C-type lectin domain family 14, member A	http://www.ncbi.nlm.nih.gov/gene/?term=314148
Adcy1	protein_coding	chr14:87311912-87424511	+	602	594	590	188	187	298	-1.32553	4.10019	2.86123e-09	2.33669e-07	adenylate cyclase 1	http://www.ncbi.nlm.nih.gov/gene/?term=305509
Car4	protein_coding	chr10:72272286-72281069	+	2365	1639	2006	787	499	1015	-1.32628	5.84392	6.55989e-10	6.20243e-08	carbonic anhydrase 4	http://www.ncbi.nlm.nih.gov/gene/?term=29242
Ace3	protein_coding	chr10:94192581-94206274	+	113	122	116	31	32	69	-1.33023	1.78243	0.000114114	0.00258839	angiotensin I converting enzyme (peptidyl-dipeptidase A) 3	http://www.ncbi.nlm.nih.gov/gene/?term=498012
LOC102550556	lncRNA	chr6:14501668-14504760	-	47	95	53	13	26	33	-1.33229	0.967184	0.00345816	0.0426981	uncharacterized LOC102550556	http://www.ncbi.nlm.nih.gov/gene/?term=102550556
Amer2	protein_coding	chr15:40663791-40667705	+	96	78	81	36	29	31	-1.3323	1.33562	1.49755e-05	0.000470723	APC membrane recruitment protein 2	http://www.ncbi.nlm.nih.gov/gene/?term=498529
Slc25a34	protein_coding	chr5:160176122-160179978	-	61	81	65	23	28	26	-1.33324	1.04715	0.000118765	0.0026733	solute carrier family 25, member 34	http://www.ncbi.nlm.nih.gov/gene/?term=298606
LOC102553287	pseudogene	chr13:96944231-96948010	-	45	164	82	46	26	39	-1.33846	1.52335	0.00243792	0.0323489	coiled-coil domain-containing protein 121-like	http://www.ncbi.nlm.nih.gov/gene/?term=102553287
T	protein_coding	chr1:52887067-52897323	-	47	126	130	40	44	27	-1.33858	1.56508	0.00134039	0.0199827	T brachyury transcription factor	http://www.ncbi.nlm.nih.gov/gene/?term=292301
Myo1a	protein_coding	chr7:71004417-71019372	+	77	46	57	17	17	33	-1.34376	0.850178	0.000725718	0.0121051	myosin IA	http://www.ncbi.nlm.nih.gov/gene/?term=299509
Hapln2	protein_coding	chr2:187395104-187404813	-	52	59	52	20	23	17	-1.34837	0.713992	0.000185999	0.0038919	hyaluronan and proteoglycan link protein 2	http://www.ncbi.nlm.nih.gov/gene/?term=64057
LOC679924	protein_coding	chr12:16233512-16283177	-	116	108	95	34	43	40	-1.35253	1.64568	1.5518e-05	0.000484874	similar to Kif19A CG9913-PB, isoform B	http://www.ncbi.nlm.nih.gov/gene/?term=679924
LOC102550643	lncRNA	chr4:34755480-34764576	+	48	97	39	21	16	32	-1.35448	0.887269	0.00239268	0.0319043	uncharacterized LOC102550643	http://www.ncbi.nlm.nih.gov/gene/?term=102550643
LOC102546426	NA	chr7:36239115-36252581	-	52	38	30	15	17	12	-1.35754	0.299934	0.00160203	0.0231796	uncharacterized LOC102546426	http://www.ncbi.nlm.nih.gov/gene/?term=102546426
LOC102549608	lncRNA	chr1:51517493-51526114	-	199	370	285	88	101	123	-1.35995	3.03509	3.16464e-06	0.000125436	uncharacterized LOC102549608	http://www.ncbi.nlm.nih.gov/gene/?term=102549608
LOC103693029	pseudogene	chr8:24082759-24087903	+	33	47	26	13	13	13	-1.36022	0.13398	0.00208902	0.0285819	replication factor C subunit 4 pseudogene	http://www.ncbi.nlm.nih.gov/gene/?term=103693029
Ccdc108	NA	chr9:82163016-82198001	-	245	645	303	169	159	111	-1.36107	3.52132	0.000102214	0.0023686	cilia and flagella associated protein 65	http://www.ncbi.nlm.nih.gov/gene/?term=301521
Best3	protein_coding	chr7:59971145-60057162	+	63	78	60	15	25	33	-1.36206	0.999475	0.000462805	0.00835411	bestrophin 3	http://www.ncbi.nlm.nih.gov/gene/?term=314847
LOC103693109	NA	chr8:65106919-65119925	+	71	87	74	21	32	31	-1.36341	1.19659	0.000102931	0.00237742	uncharacterized LOC103693109	http://www.ncbi.nlm.nih.gov/gene/?term=103693109
Adhfe1	protein_coding	chr5:9403194-9429749	-	99	101	85	35	38	31	-1.36523	1.48442	1.43411e-05	0.00045401	alcohol dehydrogenase, iron containing, 1	http://www.ncbi.nlm.nih.gov/gene/?term=362474
Cyp4a1	protein_coding	chr5:134492744-134507158	+	53	59	48	19	14	26	-1.36711	0.684285	0.000147404	0.00321959	cytochrome P450, family 4, subfamily a, polypeptide 1	http://www.ncbi.nlm.nih.gov/gene/?term=50549
Atp7b	protein_coding	chr16:74865516-74945956	+	204	357	346	149	100	85	-1.3686	3.11317	1.11984e-06	5.10306e-05	ATPase copper transporting beta	http://www.ncbi.nlm.nih.gov/gene/?term=24218
Aldh3a1	protein_coding	chr10:47490168-47499855	+	125	84	107	48	36	32	-1.36901	1.62329	9.35762e-06	0.000315748	aldehyde dehydrogenase 3 family, member A1	http://www.ncbi.nlm.nih.gov/gene/?term=25375
Fzd8	protein_coding	chr17:62259905-62267239	+	371	254	186	94	72	135	-1.37086	2.96777	1.50843e-05	0.000473302	frizzled class receptor 8	http://www.ncbi.nlm.nih.gov/gene/?term=364754
LOC102547649	lncRNA	chr2:254340264-254347272	+	66	177	92	21	44	55	-1.37146	1.71075	0.00293171	0.0375485	uncharacterized LOC102547649	http://www.ncbi.nlm.nih.gov/gene/?term=102547649
Ralyl	protein_coding	chr2:89041591-89311720	-	32	22	36	9	15	8	-1.37225	-0.0960014	0.00399217	0.0477575	RALY RNA binding protein-like	http://www.ncbi.nlm.nih.gov/gene/?term=294883
Cfap46	protein_coding	chr1:211945757-212022273	-	119	284	163	84	66	58	-1.37245	2.45101	7.35586e-05	0.00179515	cilia and flagella associated protein 46	http://www.ncbi.nlm.nih.gov/gene/?term=499282
Slc29a1	protein_coding	chr9:17784468-17799008	+	4884	4526	5007	1470	1436	2342	-1.37411	7.09036	3.26199e-12	5.14957e-10	solute carrier family 29 member 1	http://www.ncbi.nlm.nih.gov/gene/?term=63997
Abcb1b	protein_coding	chr4:22225123-22307453	-	818	855	469	261	205	327	-1.37481	4.35959	1.2752e-07	7.27315e-06	ATP-binding cassette, subfamily B (MDR/TAP), member 1B	http://www.ncbi.nlm.nih.gov/gene/?term=24646
Mypn	protein_coding	chr20:26988817-27074106	+	72	91	79	42	25	22	-1.3776	1.24991	2.66576e-05	0.000770153	myopalladin	http://www.ncbi.nlm.nih.gov/gene/?term=309760
LOC102547567	lncRNA	chr19:59645654-59660070	-	54	88	61	26	30	17	-1.37864	1.00886	0.000432222	0.0079152	uncharacterized LOC102547567	http://www.ncbi.nlm.nih.gov/gene/?term=102547567
Lamc3	protein_coding	chr3:9265407-9327130	-	184	300	226	94	71	95	-1.37909	2.76783	2.95738e-07	1.55855e-05	laminin subunit gamma 3	http://www.ncbi.nlm.nih.gov/gene/?term=311862
Fmo1	protein_coding	chr13:80712880-80745095	-	2315	1822	2480	867	623	929	-1.37944	5.96309	1.59274e-15	4.43483e-13	flavin containing monooxygenase 1	http://www.ncbi.nlm.nih.gov/gene/?term=25256
LOC102553183	lncRNA	chr19:40455768-40459757	+	57	122	74	32	29	31	-1.3802	1.31483	0.000222544	0.00451498	uncharacterized LOC102553183	http://www.ncbi.nlm.nih.gov/gene/?term=102553183
Galnt15	protein_coding	chr16:8127595-8178053	+	1051	848	804	261	366	331	-1.38975	4.68113	2.54743e-09	2.11958e-07	polypeptide N-acetylgalactosaminyltransferase-like 5	http://www.ncbi.nlm.nih.gov/gene/?term=499968
Myrip	protein_coding	chr8:128972383-129139257	+	2233	2102	2283	551	832	947	-1.39438	5.9631	9.19198e-10	8.29201e-08	myosin VIIA and Rab interacting protein	http://www.ncbi.nlm.nih.gov/gene/?term=360034
Slc10a1	protein_coding	chr6:104617730-104631355	-	120	133	110	40	56	32	-1.39566	1.8151	3.4692e-05	0.000963691	solute carrier family 10 member 1	http://www.ncbi.nlm.nih.gov/gene/?term=24777
LOC102548079	lncRNA	chr11:32373718-32379615	-	75	168	83	25	49	40	-1.40062	1.66653	0.00120733	0.0183866	uncharacterized LOC102548079	http://www.ncbi.nlm.nih.gov/gene/?term=102548079
Clec18a	protein_coding	chr19:43162845-43175841	+	48	98	64	32	28	15	-1.40109	1.04954	0.00074023	0.0123123	C-type lectin domain family 18, member A	http://www.ncbi.nlm.nih.gov/gene/?term=307851
Pik3c2g	protein_coding	chr4:173732196-174102502	+	85	106	75	27	43	23	-1.40327	1.37896	0.00022315	0.00452467	phosphatidylinositol-4-phosphate 3-kinase, catalytic subunit type 2 gamma	http://www.ncbi.nlm.nih.gov/gene/?term=116720
LOC103693463	NA	chr10:92997931-93049288	+	23	30	31	15	9	6	-1.40603	-0.191866	0.00212304	0.0288972	uncharacterized protein PFB0145c-like	http://www.ncbi.nlm.nih.gov/gene/?term=103693463
Csrnp3	protein_coding	chr3:51883559-52120290	+	185	272	261	80	68	108	-1.40867	2.77108	1.83464e-07	1.01212e-05	cysteine and serine rich nuclear protein 3	http://www.ncbi.nlm.nih.gov/gene/?term=311093
Shisa9	protein_coding	chr10:2777675-3072675	-	119	180	134	29	56	66	-1.40891	2.05926	0.000126504	0.00282236	shisa family member 9	http://www.ncbi.nlm.nih.gov/gene/?term=100361134
Hyal1	protein_coding	chr8:116332924-116335237	+	1347	1324	1145	397	415	543	-1.40896	5.17159	1.419e-12	2.38946e-10	hyaluronoglucosaminidase 1	http://www.ncbi.nlm.nih.gov/gene/?term=367166
Avil	protein_coding	chr7:70292565-70310590	+	549	472	654	186	173	234	-1.40987	3.97809	1.76944e-11	2.31744e-09	advillin	http://www.ncbi.nlm.nih.gov/gene/?term=79253
RGD1559864	NA	chr5:58359659-58387445	+	65	82	84	22	28	31	-1.41421	1.17365	2.78699e-05	0.000795428	PHD finger protein 24	http://www.ncbi.nlm.nih.gov/gene/?term=500446
LOC102547573	lncRNA	chr1:277462759-277467596	-	86	111	91	53	19	33	-1.41452	1.48332	2.3642e-05	0.000690932	uncharacterized LOC102547573	http://www.ncbi.nlm.nih.gov/gene/?term=102547573
Slc6a4	protein_coding	chr10:63153656-63186439	-	416	372	426	131	116	183	-1.41752	3.51914	5.10318e-10	4.91713e-08	solute carrier family 6 member 4	http://www.ncbi.nlm.nih.gov/gene/?term=25553
LOC102553857	lncRNA	chr6:6269746-6275994	-	31	69	48	27	15	11	-1.41772	0.564219	0.00150253	0.0219129	uncharacterized LOC102553857	http://www.ncbi.nlm.nih.gov/gene/?term=102553857
LOC102546824	lncRNA	chr4:80673851-80682870	+	34	42	60	12	18	17	-1.42013	0.44021	0.000674137	0.0114007	uncharacterized LOC102546824	http://www.ncbi.nlm.nih.gov/gene/?term=102546824
LOC102549748	lncRNA	chr1:127469609-127481662	-	25	58	37	18	8	17	-1.42333	0.280782	0.00178211	0.0251938	uncharacterized LOC102549748	http://www.ncbi.nlm.nih.gov/gene/?term=102549748
LOC102551684	lncRNA	chr13:70471651-70483002	+	33	62	34	14	18	13	-1.42352	0.380244	0.00143507	0.021083	uncharacterized LOC102551684	http://www.ncbi.nlm.nih.gov/gene/?term=102551684
Arr3	protein_coding	chrX:70438643-70452138	+	68	122	98	47	30	25	-1.42887	1.47834	4.20842e-05	0.00112948	arrestin 3	http://www.ncbi.nlm.nih.gov/gene/?term=171107
LOC690319	protein_coding	chr6:127590734-127600821	-	35	61	29	12	11	21	-1.43344	0.337781	0.00182742	0.0256944	similar to Alpha-1-antitrypsin-related protein precursor	http://www.ncbi.nlm.nih.gov/gene/?term=690319
Nyx	protein_coding	chrX:10197547-10218583	-	39	56	29	12	16	15	-1.43654	0.325678	0.00108163	0.0168644	nyctalopin	http://www.ncbi.nlm.nih.gov/gene/?term=302516
LOC103691311	lncRNA	chr1:240759947-240766665	-	43	72	52	11	28	17	-1.44518	0.721235	0.0016886	0.0241554	uncharacterized LOC103691311	http://www.ncbi.nlm.nih.gov/gene/?term=103691311
LOC103692673	NA	chr6:104619941-104621516	+	108	128	138	35	43	50	-1.44956	1.83709	1.37234e-06	6.06293e-05	uncharacterized LOC103692673	http://www.ncbi.nlm.nih.gov/gene/?term=103692673
Gnat2	protein_coding	chr2:210880754-210890765	+	187	307	230	70	65	116	-1.4517	2.77636	1.64484e-06	7.08464e-05	G protein subunit alpha transducin 2	http://www.ncbi.nlm.nih.gov/gene/?term=365901
LOC102550720	lncRNA	chr1:57119311-57125689	+	338	205	279	107	73	106	-1.45489	2.95269	2.50928e-08	1.66167e-06	uncharacterized LOC102550720	http://www.ncbi.nlm.nih.gov/gene/?term=102550720
LOC102556289	lncRNA	chr7:80599154-80604334	-	50	92	42	22	18	24	-1.45493	0.859651	0.000452087	0.00820673	uncharacterized LOC102556289	http://www.ncbi.nlm.nih.gov/gene/?term=102556289
Slc16a8	protein_coding	chr7:120486266-120490190	-	24	33	34	12	12	7	-1.4564	-0.0993352	0.00108429	0.0168814	solute carrier family 16 member 8	http://www.ncbi.nlm.nih.gov/gene/?term=65200
Cdo1	protein_coding	chr18:40702027-40716902	-	4010	2766	3041	883	1117	1337	-1.45815	6.51756	5.70858e-11	6.61859e-09	cysteine dioxygenase type 1	http://www.ncbi.nlm.nih.gov/gene/?term=81718
LOC102547715	lncRNA	chr1:277527890-277537326	-	20	20	18	10	5	5	-1.45864	-0.675051	0.00330158	0.0411528	uncharacterized LOC102547715	http://www.ncbi.nlm.nih.gov/gene/?term=102547715
Fam107a	protein_coding	chr15:18399733-18415959	+	391	528	405	78	144	226	-1.45886	3.63761	1.68736e-05	0.000515735	family with sequence similarity 107, member A	http://www.ncbi.nlm.nih.gov/gene/?term=361018
Ackr4	protein_coding	chr8:112643838-112651664	-	405	266	362	95	85	173	-1.47112	3.27363	4.17147e-07	2.11638e-05	atypical chemokine receptor 4	http://www.ncbi.nlm.nih.gov/gene/?term=685243
LOC102553195	NA	chr5:15359672-15454146	+	45	86	56	25	18	21	-1.47531	0.871136	0.000115943	0.00262314	lipoxygenase homology domain-containing protein 1-like	http://www.ncbi.nlm.nih.gov/gene/?term=102553195
Fam46b	protein_coding	chr5:151692068-151699381	+	953	709	838	128	354	332	-1.47755	4.54056	1.54039e-05	0.000482045	family with sequence similarity 46, member B	http://www.ncbi.nlm.nih.gov/gene/?term=313019
LOC691144	pseudogene	chr17:28184325-28186458	-	33	67	50	20	20	10	-1.49008	0.563315	0.000679137	0.0114688	similar to 3-phosphoglycerate dehydrogenase	http://www.ncbi.nlm.nih.gov/gene/?term=691144
Fam13a	protein_coding	chr4:89182751-89281271	-	742	702	565	214	251	204	-1.49052	4.22999	1.04478e-10	1.16181e-08	family with sequence similarity 13, member A	http://www.ncbi.nlm.nih.gov/gene/?term=362378
Gstm7	protein_coding	chr2:210720720-210726179	-	105	90	98	35	26	38	-1.49104	1.48624	4.6182e-07	2.31973e-05	glutathione S-transferase, mu 7	http://www.ncbi.nlm.nih.gov/gene/?term=81869
Sstr1	protein_coding	chr6:79252914-79258611	+	187	216	234	50	53	110	-1.4949	2.57763	2.81362e-06	0.000112934	somatostatin receptor 1	http://www.ncbi.nlm.nih.gov/gene/?term=25033
Lyve1	protein_coding	chr1:175663266-175676699	-	4333	3985	3685	1153	1198	1657	-1.49745	6.79763	6.50752e-15	1.60922e-12	lymphatic vessel endothelial hyaluronan receptor 1	http://www.ncbi.nlm.nih.gov/gene/?term=293186
Cyp2a3	protein_coding	chr1:83653248-83662118	+	1293	736	2064	763	405	212	-1.4976	5.22463	5.3382e-05	0.00137287	cytochrome P450, family 2, subfamily a, polypeptide 3	http://www.ncbi.nlm.nih.gov/gene/?term=24299
Atp1a2	protein_coding	chr13:90651682-90676629	-	627	790	637	171	235	272	-1.49853	4.25677	8.31547e-10	7.59823e-08	ATPase Na+/K+ transporting subunit alpha 2	http://www.ncbi.nlm.nih.gov/gene/?term=24212
Elfn1	protein_coding	chr12:16749340-16813838	-	73	42	21	14	11	21	-1.503	0.439472	0.00352708	0.0433001	extracellular leucine-rich repeat and fibronectin type III domain containing 1	http://www.ncbi.nlm.nih.gov/gene/?term=288512
LOC102546862	protein_coding	chr11:88540485-88547741	-	45	166	61	34	25	33	-1.50373	1.3907	0.001611	0.0232618	uncharacterized LOC102546862	http://www.ncbi.nlm.nih.gov/gene/?term=102546862
LOC102550993	pseudogene	chr9:55504002-55512246	+	142	268	170	53	77	59	-1.51054	2.44882	1.05749e-05	0.000351786	nucleophosmin-like	http://www.ncbi.nlm.nih.gov/gene/?term=102550993
LOC103690849	lncRNA	chrX:71047961-71051416	-	24	25	36	13	9	6	-1.51182	-0.204646	0.00109767	0.017032	uncharacterized LOC103690849	http://www.ncbi.nlm.nih.gov/gene/?term=103690849
Wnk2	protein_coding	chr17:15923596-16032271	+	743	1359	863	187	401	363	-1.51391	4.78252	3.53256e-06	0.000138031	WNK lysine deficient protein kinase 2	http://www.ncbi.nlm.nih.gov/gene/?term=306811
LOC103693283	NA	chr15:13165585-13171147	-	124	337	154	84	55	67	-1.52284	2.53345	4.51357e-05	0.00120097	uncharacterized LOC103693283	http://www.ncbi.nlm.nih.gov/gene/?term=103693283
Hepacam2	protein_coding	chr4:28403050-28437746	-	57	81	102	26	26	26	-1.52479	1.19347	9.6518e-06	0.000325054	HEPACAM family member 2	http://www.ncbi.nlm.nih.gov/gene/?term=296846
Bmp15	protein_coding	chrX:17016831-17021894	+	135	65	72	24	27	38	-1.52727	1.37901	0.000110009	0.00251464	bone morphogenetic protein 15	http://www.ncbi.nlm.nih.gov/gene/?term=59302
LOC102554201	NA	chr6:25101552-25108541	-	977	1029	944	246	353	347	-1.53286	4.76678	8.62671e-12	1.22513e-09	uncharacterized LOC102554201	http://www.ncbi.nlm.nih.gov/gene/?term=102554201
Fam227a	protein_coding	chr7:120846166-120891765	-	160	375	140	88	62	74	-1.53702	2.66651	4.13393e-05	0.00111506	family with sequence similarity 227, member A	http://www.ncbi.nlm.nih.gov/gene/?term=300074
LOC688542	protein_coding	chr1:282714617-282733147	+	133	79	100	30	28	43	-1.546	1.56159	4.25793e-06	0.000161209	pyrethroid hydrolase Ces2e-like	http://www.ncbi.nlm.nih.gov/gene/?term=688542
LOC102555849	lncRNA	chr9:119476536-119499888	-	77	62	53	28	14	21	-1.55009	0.889637	1.59064e-05	0.00049185	uncharacterized LOC102555849	http://www.ncbi.nlm.nih.gov/gene/?term=102555849
2020-03-01	protein_coding	chr13:102698522-102721218	-	117	204	99	19	66	44	-1.55982	1.98343	0.00102736	0.0161752	alpha-methylacyl-CoA racemase	http://www.ncbi.nlm.nih.gov/gene/?term=25284
LOC102547798	protein_coding	chr16:2463615-2466948	+	61	165	68	31	34	28	-1.57509	1.48052	0.000310121	0.00598064	protein phosphatase 1 regulatory subunit 26-like	http://www.ncbi.nlm.nih.gov/gene/?term=102547798
LOC691485	protein_coding	chr6:137063531-137073406	+	27	26	34	15	2	11	-1.58548	-0.1886	0.00122754	0.0186382	hypothetical protein LOC691485	http://www.ncbi.nlm.nih.gov/gene/?term=691485
LOC102556061	lncRNA	chr4:125191599-125242557	+	549	1163	586	196	243	280	-1.58643	4.40221	1.66617e-07	9.2786e-06	uncharacterized LOC102556061	http://www.ncbi.nlm.nih.gov/gene/?term=102556061
Slc15a2	protein_coding	chr11:66932664-66961708	+	1285	1181	1138	291	388	431	-1.59737	5.03871	2.20813e-13	4.29033e-11	solute carrier family 15 member 2	http://www.ncbi.nlm.nih.gov/gene/?term=60577
LOC102554801	lncRNA	chr6:132186660-132191220	-	38	53	47	23	7	14	-1.5975	0.423799	0.000100825	0.00234102	uncharacterized LOC102554801	http://www.ncbi.nlm.nih.gov/gene/?term=102554801
LOC102555022	lncRNA	chr18:2856553-2873323	-	55	100	74	20	23	28	-1.59888	1.11923	1.85644e-05	0.000559662	uncharacterized LOC102555022	http://www.ncbi.nlm.nih.gov/gene/?term=102555022
Gpihbp1	protein_coding	chr7:116632496-116635543	+	1496	974	1431	346	345	516	-1.6038	5.14454	5.05959e-13	9.17524e-11	glycosylphosphatidylinositol anchored high density lipoprotein binding protein 1	http://www.ncbi.nlm.nih.gov/gene/?term=300027
LOC100363557	pseudogene	chr1:280036988-280045508	+	26	41	16	11	7	8	-1.60761	-0.243555	0.00224955	0.0303621	hypothetical LOC100363557	http://www.ncbi.nlm.nih.gov/gene/?term=100363557
Syndig1	protein_coding	chr3:145032177-145199196	+	152	147	257	53	47	71	-1.60806	2.34708	1.02708e-07	5.97363e-06	synapse differentiation inducing 1	http://www.ncbi.nlm.nih.gov/gene/?term=362235
LOC103693726	NA	chr15:59532870-59609230	+	30	38	25	12	7	10	-1.60946	-0.100253	0.000343401	0.00652869	uncharacterized LOC103693726	http://www.ncbi.nlm.nih.gov/gene/?term=103693726
LOC102553246	lncRNA	chr20:19696130-19702905	+	112	81	73	30	22	31	-1.61112	1.32715	1.57567e-06	6.86193e-05	uncharacterized LOC102553246	http://www.ncbi.nlm.nih.gov/gene/?term=102553246
Add2	protein_coding	chr4:117744075-117882427	+	101	102	177	57	25	37	-1.61128	1.80881	1.28644e-06	5.73657e-05	adducin 2	http://www.ncbi.nlm.nih.gov/gene/?term=24171
LOC365821	pseudogene	chr2:173434961-173435954	+	12	27	16	7	4	6	-1.6124	-0.772915	0.00412759	0.048947	similar to Voltage-dependent anion-selective channel protein 1 (VDAC-1) (mVDAC1) (mVDAC5) (Outer mitochondrial membrane protein porin 1) (Plasmalemmal porin)	http://www.ncbi.nlm.nih.gov/gene/?term=365821
LOC102547893	lncRNA	chr16:2383088-2387127	-	43	50	31	17	7	15	-1.61386	0.282254	0.000143415	0.00314809	uncharacterized LOC102547893	http://www.ncbi.nlm.nih.gov/gene/?term=102547893
Sh3rf2	protein_coding	chr18:36371041-36471020	+	329	320	297	83	90	118	-1.61423	3.11678	8.26664e-11	9.33945e-09	SH3 domain containing ring finger 2	http://www.ncbi.nlm.nih.gov/gene/?term=307472
Smim2	NA	chr15:58917217-58921811	+	21	59	24	11	10	11	-1.62119	0.0478792	0.00224097	0.0302693	small integral membrane protein 2	http://www.ncbi.nlm.nih.gov/gene/?term=103693814
LOC102548323	lncRNA	chr1:124243294-124311590	-	17	24	18	6	5	7	-1.62148	-0.688574	0.00197919	0.0273711	uncharacterized LOC102548323	http://www.ncbi.nlm.nih.gov/gene/?term=102548323
LOC102550082	lncRNA	chr4:1218937-1256156	-	70	83	60	27	18	21	-1.62219	1.01602	1.90886e-06	8.11311e-05	uncharacterized LOC102550082	http://www.ncbi.nlm.nih.gov/gene/?term=102550082
Serpinb10	protein_coding	chr13:27466036-27483789	+	661	421	590	40	233	211	-1.62274	3.92372	0.000726097	0.0121057	serpin family B member 10	http://www.ncbi.nlm.nih.gov/gene/?term=266775
Alox15	protein_coding	chr10:56953692-56962140	-	176	101	152	41	54	34	-1.62277	1.98765	2.2283e-06	9.23766e-05	arachidonate 15-lipoxygenase	http://www.ncbi.nlm.nih.gov/gene/?term=81639
Acer2	protein_coding	chr5:105230538-105279732	+	19266	10630	15003	2400	5287	5489	-1.63715	8.66089	3.03296e-07	1.59127e-05	alkaline ceramidase 2	http://www.ncbi.nlm.nih.gov/gene/?term=313339
Pdk4	protein_coding	chr4:30546772-30556774	-	121	203	136	45	46	48	-1.64205	2.08814	1.76214e-07	9.78224e-06	pyruvate dehydrogenase kinase 4	http://www.ncbi.nlm.nih.gov/gene/?term=89813
P2ry4	protein_coding	chrX:70421599-70447110	-	162	555	385	116	113	102	-1.64419	3.32467	6.8728e-06	0.000241107	pyrimidinergic receptor P2Y4	http://www.ncbi.nlm.nih.gov/gene/?term=63843
Vipr1	protein_coding	chr8:130283453-130313431	+	28499	23902	21717	6135	6394	9774	-1.65051	9.38599	8.37302e-15	2.02799e-12	vasoactive intestinal peptide receptor 1	http://www.ncbi.nlm.nih.gov/gene/?term=24875
LOC103690985	NA	chr1:54426960-54441596	-	368	201	291	157	16	103	-1.65189	2.96916	0.00058891	0.0101984	uncharacterized LOC103690985	http://www.ncbi.nlm.nih.gov/gene/?term=103690985
LOC685767	protein_coding	chr11:60306773-60363004	+	57	27	36	9	9	18	-1.65196	0.2261	0.000489301	0.0087343	similar to OX-2 membrane glycoprotein precursor (MRC OX-2 antigen) (CD200 antigen)	http://www.ncbi.nlm.nih.gov/gene/?term=685767
Clec12b	protein_coding	chr4:163141632-163157982	-	26	77	28	9	14	16	-1.65284	0.350165	0.00247436	0.0327586	C-type lectin domain family 12, member B	http://www.ncbi.nlm.nih.gov/gene/?term=502900
Dok6	protein_coding	chr18:86420361-86878142	-	37	35	22	5	15	7	-1.66914	-0.0986617	0.00202466	0.0278909	docking protein 6	http://www.ncbi.nlm.nih.gov/gene/?term=498898
Doc2b	protein_coding	chr10:63924969-63952948	-	741	884	607	179	212	262	-1.68515	4.33401	2.98383e-12	4.75289e-10	double C2 domain beta	http://www.ncbi.nlm.nih.gov/gene/?term=81820
RGD1566226	protein_coding	chr3:121977668-122057632	-	173	64	113	20	45	34	-1.68973	1.68713	0.000161498	0.00346746	similar to hypothetical protein F830045P16	http://www.ncbi.nlm.nih.gov/gene/?term=296149
Frmd1	protein_coding	chr1:54317100-54328405	-	41	114	52	21	17	23	-1.69243	0.964197	0.000199733	0.00413523	FERM domain containing 1	http://www.ncbi.nlm.nih.gov/gene/?term=689709
Otud7a	protein_coding	chr1:124507781-124655437	+	955	1039	913	199	234	402	-1.71293	4.7021	1.04089e-11	1.46573e-09	OTU deubiquitinase 7A	http://www.ncbi.nlm.nih.gov/gene/?term=309252
Xkr6	protein_coding	chr15:46784963-47173352	+	28	37	26	8	8	10	-1.71876	-0.152705	0.00015154	0.00328967	XK related 6	http://www.ncbi.nlm.nih.gov/gene/?term=305960
Fmo3	protein_coding	chr13:80837418-80856214	-	1062	912	851	177	336	273	-1.72061	4.66059	4.82951e-10	4.70472e-08	flavin containing monooxygenase 3	http://www.ncbi.nlm.nih.gov/gene/?term=84493
LOC102547513	lncRNA	chr19:59653702-59662562	+	253	230	201	54	70	70	-1.72221	2.63176	8.81705e-10	7.97413e-08	uncharacterized LOC102547513	http://www.ncbi.nlm.nih.gov/gene/?term=102547513
Gria1	protein_coding	chr10:42441723-42760200	+	69	79	64	20	24	16	-1.72582	0.985673	1.63353e-06	7.0531e-05	glutamate ionotropic receptor AMPA type subunit 1	http://www.ncbi.nlm.nih.gov/gene/?term=50592
Ptprh	protein_coding	chr1:72809937-72859161	+	22	28	20	12	7	1	-1.72948	-0.493681	0.00283188	0.0364679	protein tyrosine phosphatase, receptor type, H	http://www.ncbi.nlm.nih.gov/gene/?term=171125
Vil1	protein_coding	chr9:81689802-81717623	+	122	107	122	27	34	38	-1.72983	1.68243	1.90937e-08	1.29595e-06	villin 1	http://www.ncbi.nlm.nih.gov/gene/?term=316521
Adh6a	protein_coding	chr2:243580381-243599357	+	16	13	29	4	6	6	-1.73276	-0.741725	0.00279986	0.0361345	alcohol dehydrogenase 6A (class V)	http://www.ncbi.nlm.nih.gov/gene/?term=295498
LOC102552213	lncRNA	chr1:50138881-50142054	-	25	45	14	7	5	12	-1.74096	-0.25433	0.00314934	0.0397313	uncharacterized LOC102552213	http://www.ncbi.nlm.nih.gov/gene/?term=102552213
Stox1	protein_coding	chr20:32276857-32353677	-	227	253	206	47	65	80	-1.74131	2.63099	3.34207e-09	2.68596e-07	storkhead box 1	http://www.ncbi.nlm.nih.gov/gene/?term=294388
LOC102547243	NA	chr15:59625047-59667096	-	84	126	81	22	25	35	-1.74318	1.42322	1.11008e-06	5.07168e-05	uncharacterized LOC102547243	http://www.ncbi.nlm.nih.gov/gene/?term=102547243
Plin1	protein_coding	chr1:141458993-141471096	-	21	19	28	7	3	9	-1.75285	-0.54216	0.000481416	0.00863278	perilipin 1	http://www.ncbi.nlm.nih.gov/gene/?term=25629
Asb15	protein_coding	chr4:51598829-51642276	+	46	64	55	16	12	18	-1.76378	0.630584	1.5184e-06	6.64526e-05	ankyrin repeat and SOCS box containing 15	http://www.ncbi.nlm.nih.gov/gene/?term=500050
Col6a4	protein_coding	chr8:114670628-114766803	-	624	355	483	131	89	188	-1.77735	3.69813	2.04664e-10	2.16104e-08	collagen, type VI, alpha 4	http://www.ncbi.nlm.nih.gov/gene/?term=315981
Barhl1	protein_coding	chr3:7491234-7498555	-	15	26	10	6	4	4	-1.78148	-0.895128	0.00378465	0.0457218	BarH-like homeobox 1	http://www.ncbi.nlm.nih.gov/gene/?term=117232
LOC103693036	pseudogene	chr8:33394536-33397073	+	20	26	13	5	6	5	-1.78426	-0.717193	0.00179364	0.0253201	ATP synthase F(0) complex subunit C1, mitochondrial pseudogene	http://www.ncbi.nlm.nih.gov/gene/?term=103693036
LOC102555924	lncRNA	chr5:24220312-24230769	-	76	125	66	32	30	11	-1.78522	1.29649	4.94607e-05	0.00128692	uncharacterized LOC102555924	http://www.ncbi.nlm.nih.gov/gene/?term=102555924
Tmem169	protein_coding	chr9:79630566-79654684	+	171	85	101	15	33	48	-1.78624	1.69779	5.46925e-05	0.00140147	transmembrane protein 169	http://www.ncbi.nlm.nih.gov/gene/?term=690294
Pou2f3	protein_coding	chr8:47412063-47495042	-	20	55	42	5	12	14	-1.79562	0.158352	0.00090314	0.0145432	POU class 2 homeobox 3	http://www.ncbi.nlm.nih.gov/gene/?term=116544
Impg1	protein_coding	chr8:87733545-87879888	-	19	21	17	3	4	8	-1.82405	-0.771057	0.00117734	0.018023	interphotoreceptor matrix proteoglycan 1	http://www.ncbi.nlm.nih.gov/gene/?term=66014
Fbxo40	protein_coding	chr11:66713915-66731195	+	149	191	179	44	54	38	-1.83037	2.21206	8.48039e-10	7.70909e-08	F-box protein 40	http://www.ncbi.nlm.nih.gov/gene/?term=363790
Cpvl	protein_coding	chr4:84026851-84137184	-	17	16	21	5	4	5	-1.84331	-0.845239	0.000581049	0.0100869	carboxypeptidase, vitellogenic-like	http://www.ncbi.nlm.nih.gov/gene/?term=502774
Atp2b3	protein_coding	chrX:157236400-157312028	-	23	44	38	15	5	8	-1.84366	0.00557999	0.000106827	0.00244982	ATPase plasma membrane Ca2+ transporting 3	http://www.ncbi.nlm.nih.gov/gene/?term=29599
Cth	protein_coding	chr2:264267029-264293041	-	36	25	28	9	9	5	-1.85489	-0.210792	8.87063e-05	0.00210667	cystathionine gamma-lyase	http://www.ncbi.nlm.nih.gov/gene/?term=24962
Fam135b	protein_coding	chr7:112672196-112937783	-	29	21	20	8	7	3	-1.86348	-0.520177	0.000500717	0.00890662	family with sequence similarity 135, member B	http://www.ncbi.nlm.nih.gov/gene/?term=315069
LOC100910265	NA	chrX:144327432-144339400	-	85	284	124	38	49	39	-1.87122	2.13963	2.16649e-05	0.000640563	None	http://www.ncbi.nlm.nih.gov/gene/?term=LOC100910265
Sh2d7	protein_coding	chr8:59110859-59122584	+	235	279	280	59	73	70	-1.87516	2.80488	1.22781e-12	2.0874e-10	SH2 domain containing 7	http://www.ncbi.nlm.nih.gov/gene/?term=300718
Hmgcs2	protein_coding	chr2:200452619-200480785	+	1685	1949	1909	457	428	518	-1.89732	5.58647	4.69929e-28	8.74612e-25	3-hydroxy-3-methylglutaryl-CoA synthase 2	http://www.ncbi.nlm.nih.gov/gene/?term=24450
LOC103692947	NA	chr7:121483402-121502631	+	64	37	29	12	10	11	-1.90054	0.287308	4.56575e-05	0.0012103	uncharacterized LOC103692947	http://www.ncbi.nlm.nih.gov/gene/?term=103692947
LOC691161	NA	chr4:100373808-100381708	-	78	162	139	28	38	27	-1.91683	1.74903	2.82972e-07	1.50022e-05	None	http://www.ncbi.nlm.nih.gov/gene/?term=LOC691161
Mlc1	protein_coding	chr7:129949984-129970298	-	251	218	245	25	79	67	-1.91867	2.6446	9.40866e-07	4.36626e-05	myosin, light chain 1	http://www.ncbi.nlm.nih.gov/gene/?term=56781
Inmt	protein_coding	chr4:85381907-85386203	-	735	673	673	193	165	159	-1.92939	4.17345	9.48046e-23	9.31244e-20	indolethylamine N-methyltransferase	http://www.ncbi.nlm.nih.gov/gene/?term=368066
LOC102553512	NA	chr3:145017404-145092689	+	10	12	29	4	4	4	-1.9558	-0.94241	0.00349694	0.0430417	homeobox protein unc-4 homolog	http://www.ncbi.nlm.nih.gov/gene/?term=102553512
Ttll2	protein_coding	chr1:53561142-53572635	-	55	134	50	21	19	18	-1.96901	1.10883	1.97057e-05	0.000590036	tubulin tyrosine ligase like 2	http://www.ncbi.nlm.nih.gov/gene/?term=292311
LOC686084	protein_coding	chr10:93190854-93281660	+	39	49	45	10	16	5	-1.9824	0.295997	1.91917e-05	0.000576598	similar to CG32580-PA	http://www.ncbi.nlm.nih.gov/gene/?term=686084
Trpm5	protein_coding	chr1:216256661-216281500	-	212	396	249	70	73	59	-1.99651	2.89531	1.4733e-10	1.58838e-08	transient receptor potential cation channel, subfamily M, member 5	http://www.ncbi.nlm.nih.gov/gene/?term=365391
LOC102554752	lncRNA	chr1:243294754-243307566	-	28	151	54	23	8	26	-2.00033	1.06759	0.000713976	0.0119431	uncharacterized LOC102554752	http://www.ncbi.nlm.nih.gov/gene/?term=102554752
LOC102552298	lncRNA	chr2:184000982-184002940	+	24	19	22	9	3	3	-2.03429	-0.646947	0.00015814	0.00340986	uncharacterized LOC102552298	http://www.ncbi.nlm.nih.gov/gene/?term=102552298
LOC103692017	lncRNA	chr13:80761394-80763542	+	111	202	151	25	43	36	-2.04427	2.01279	2.19317e-08	1.46606e-06	uncharacterized LOC103692017	http://www.ncbi.nlm.nih.gov/gene/?term=103692017
LOC102546657	lncRNA	chr17:72785668-72791585	-	34	90	57	15	16	10	-2.04588	0.703502	1.17778e-05	0.000384923	uncharacterized LOC102546657	http://www.ncbi.nlm.nih.gov/gene/?term=102546657
LOC103692720	NA	chr6:137021169-137023568	-	13	10	17	6	1	2	-2.05419	-1.24031	0.00212012	0.0288797	uncharacterized LOC103692720	http://www.ncbi.nlm.nih.gov/gene/?term=103692720
LOC100910189	lncRNA	chr18:52552266-52560155	-	19	21	18	8	3	2	-2.07215	-0.793415	0.000229707	0.00463635	uncharacterized LOC100910189	http://www.ncbi.nlm.nih.gov/gene/?term=100910189
LOC103694706	NA	chrY_KL568157v1_random:2073018-2127085	-	41	14	68	18	3	7	-2.08238	0.160327	0.000901713	0.0145268	uncharacterized LOC103694706	http://www.ncbi.nlm.nih.gov/gene/?term=103694706
Acot1	protein_coding	chr6:107485088-107493082	+	123	212	181	42	35	38	-2.08451	2.15213	1.19747e-11	1.6541e-09	acyl-CoA thioesterase 1	http://www.ncbi.nlm.nih.gov/gene/?term=50559
LOC103690367	NA	chr3:54809268-54898516	+	24	62	23	6	9	9	-2.0846	0.0201858	0.000227769	0.00460512	uncharacterized LOC103690367	http://www.ncbi.nlm.nih.gov/gene/?term=103690367
LOC103693125	lncRNA	chr8:73928155-74001218	+	25	50	26	7	10	5	-2.09163	-0.0842804	7.39828e-05	0.00180178	uncharacterized LOC103693125	http://www.ncbi.nlm.nih.gov/gene/?term=103693125
Fxyd7	protein_coding	chr1:89474601-89484068	-	23	20	26	3	3	9	-2.09732	-0.583406	0.000148365	0.00323692	FXYD domain-containing ion transport regulator 7	http://www.ncbi.nlm.nih.gov/gene/?term=63848
Pcdh20	protein_coding	chr15:71772777-71779033	-	70	43	57	12	13	12	-2.10498	0.605393	1.46676e-07	8.25917e-06	protocadherin 20	http://www.ncbi.nlm.nih.gov/gene/?term=306081
Prom2	protein_coding	chr3:120092564-120107496	-	92	174	125	17	42	22	-2.13253	1.75585	7.57233e-07	3.59909e-05	prominin 2	http://www.ncbi.nlm.nih.gov/gene/?term=192211
Cyp2e1	protein_coding	chr1:213511538-213522196	+	1207	914	1018	122	207	331	-2.14556	4.72123	2.80237e-12	4.54575e-10	cytochrome P450, family 2, subfamily e, polypeptide 1	http://www.ncbi.nlm.nih.gov/gene/?term=25086
LOC102553397	NA	chr6:79328050-79332268	+	26	35	14	7	5	4	-2.1457	-0.475726	0.000141042	0.00310556	uncharacterized LOC102553397	http://www.ncbi.nlm.nih.gov/gene/?term=102553397
LOC102550275	lncRNA	chr14:73380984-73383477	+	34	26	12	3	7	5	-2.14643	-0.527766	0.000590705	0.0102094	uncharacterized LOC102550275	http://www.ncbi.nlm.nih.gov/gene/?term=102550275
LOC685215	protein_coding	chr3:54890117-54968849	+	41	44	22	11	3	9	-2.16585	-0.0182668	2.41365e-05	0.000702482	similar to ankyrin repeat domain 26	http://www.ncbi.nlm.nih.gov/gene/?term=685215
LOC498264	pseudogene	chr13:80782333-80785536	-	13	18	8	3	3	2	-2.16653	-1.27843	0.00178941	0.0252704	similar to heat shock protein 1, alpha	http://www.ncbi.nlm.nih.gov/gene/?term=498264
Sytl5	protein_coding	chrX:14017405-14109592	+	145	165	114	14	40	32	-2.17456	1.86677	1.04506e-07	6.05827e-06	synaptotagmin-like 5	http://www.ncbi.nlm.nih.gov/gene/?term=302538
LOC103690793	NA	chrX:13857676-13943713	+	38	81	37	5	10	17	-2.18777	0.48183	4.21995e-05	0.00113136	uncharacterized LOC103690793	http://www.ncbi.nlm.nih.gov/gene/?term=103690793
LOC102547445	NA	chr7:50391588-50405707	+	16	9	10	3	1	3	-2.20556	-1.41051	0.00201894	0.0278229	uncharacterized LOC102547445	http://www.ncbi.nlm.nih.gov/gene/?term=102547445
Nat8	protein_coding	chr4:117525963-117527391	-	17	13	12	2	2	4	-2.26939	-1.20971	0.000443155	0.00808191	N-acetyltransferase 8	http://www.ncbi.nlm.nih.gov/gene/?term=64570
Fmo2	protein_coding	chr13:80752552-80775338	-	22565	23612	20099	2582	4466	5558	-2.28314	9.09448	4.40782e-17	1.55869e-14	flavin containing monooxygenase 2	http://www.ncbi.nlm.nih.gov/gene/?term=246245
RGD1564613	misc_RNA	chrX:10930899-10932839	-	9	9	9	2	1	2	-2.28345	-1.70529	0.00322948	0.0405255	similar to MGC40405 protein	http://www.ncbi.nlm.nih.gov/gene/?term=501520
Esm1	protein_coding	chr2:45104392-45113130	+	743	540	676	129	105	141	-2.30781	4.01353	4.21485e-27	6.48024e-24	endothelial cell-specific molecule 1	http://www.ncbi.nlm.nih.gov/gene/?term=64536
LOC103691262	lncRNA	chr1:213527159-213536336	+	19	20	15	1	3	6	-2.31043	-0.914747	0.000287203	0.00561419	uncharacterized LOC103691262	http://www.ncbi.nlm.nih.gov/gene/?term=103691262
Mchr1	protein_coding	chr7:122456846-122459324	+	10	38	13	1	5	5	-2.33319	-0.766143	0.00251028	0.0331722	melanin-concentrating hormone receptor 1	http://www.ncbi.nlm.nih.gov/gene/?term=83567
LOC100912028	protein_coding	chr11:88569662-88570666	+	9	30	26	6	3	3	-2.33613	-0.694758	0.000262559	0.00519854	olfactory receptor 19-like	http://www.ncbi.nlm.nih.gov/gene/?term=100912028
LOC103692016	lncRNA	chr13:80763630-80764708	+	949	737	671	96	149	176	-2.38263	4.27382	7.1647e-18	2.98943e-15	uncharacterized LOC103692016	http://www.ncbi.nlm.nih.gov/gene/?term=103692016
Syce1	protein_coding	chr1:213522054-213534641	-	252	197	181	28	27	59	-2.3911	2.38746	1.93284e-12	3.2393e-10	synaptonemal complex central element protein 1	http://www.ncbi.nlm.nih.gov/gene/?term=502372
LOC103691575	lncRNA	chr2:156362029-156379729	+	16	8	6	2	1	2	-2.44503	-1.60815	0.00353431	0.0433357	uncharacterized LOC103691575	http://www.ncbi.nlm.nih.gov/gene/?term=103691575
LOC103691968	NA	chr3:164148431-164155482	-	10	6	10	2	2	0	-2.51271	-1.772	0.00328127	0.0409719	uncharacterized LOC103691968	http://www.ncbi.nlm.nih.gov/gene/?term=103691968
LOC103693985	lncRNA	chr16:68949283-68951992	-	12	13	19	3	2	2	-2.5134	-1.19127	0.000103197	0.00238202	uncharacterized LOC103693985	http://www.ncbi.nlm.nih.gov/gene/?term=103693985
LOC102551729	lncRNA	chr20:6581863-6593025	+	11	5	12	1	0	3	-2.63199	-1.70787	0.00303395	0.0385735	uncharacterized LOC102551729	http://www.ncbi.nlm.nih.gov/gene/?term=102551729
LOC317390	pseudogene	chrX:16715634-16716908	+	15	11	10	0	4	1	-2.64974	-1.4314	0.00161504	0.0232916	similar to Cleavage and polyadenylation specificity factor, 30 kDa subunit (CPSF 30 kDa subunit) (NS1 effector domain-binding protein 1) (Neb-1) (No arches homolog)	http://www.ncbi.nlm.nih.gov/gene/?term=317390
LOC102554371	protein_coding	chr10:87927550-87928321	-	87	33	56	4	10	11	-2.6945	0.565977	3.24638e-07	1.68303e-05	keratin-associated protein 17-1-like	http://www.ncbi.nlm.nih.gov/gene/?term=102554371
Asb11	protein_coding	chrX:31758294-31781862	-	20	33	19	7	1	2	-2.76805	-0.614947	8.45709e-06	0.00028673	ankyrin repeat and SOCS box containing 11	http://www.ncbi.nlm.nih.gov/gene/?term=302666
Rps9	protein_coding	chr1:64086628-64090017	-	16	4	132	11	6	3	-2.78583	0.320047	0.00331895	0.0413256	ribosomal protein S9	http://www.ncbi.nlm.nih.gov/gene/?term=81772
Rnase12	protein_coding	chr15:27981044-27993037	-	14	8	11	3	1	0	-2.87402	-1.55178	0.000445558	0.0081132	ribonuclease A family member 12	http://www.ncbi.nlm.nih.gov/gene/?term=364302
Hoxc5	protein_coding	chr7:144628120-144631542	+	8	6	15	3	0	0	-3.07031	-1.71136	0.0013061	0.0195539	homeo box C5	http://www.ncbi.nlm.nih.gov/gene/?term=315341
LOC100911498	lncRNA	chrX:74324262-74337605	-	47	2061	132	101	76	82	-3.07341	4.13832	0.000702388	0.0117882	uncharacterized LOC100911498	http://www.ncbi.nlm.nih.gov/gene/?term=100911498
Vom2r-ps10	pseudogene	chr1:1598309-1608650	-	4	23	11	1	0	3	-3.08571	-1.4104	0.00148423	0.0216929	vomeronasal 2 receptor, pseudogene 10	http://www.ncbi.nlm.nih.gov/gene/?term=679775
LOC102554813	lncRNA	chr20:2109277-2115579	-	9	13	16	4	0	0	-3.08979	-1.41603	0.000197169	0.00408452	uncharacterized LOC102554813	http://www.ncbi.nlm.nih.gov/gene/?term=102554813
LOC102553858	protein_coding	chr14:87433082-87439871	-	12	5	5	2	0	0	-3.20441	-1.99444	0.00335347	0.041682	uncharacterized LOC102553858	http://www.ncbi.nlm.nih.gov/gene/?term=102553858
RGD1566401	lncRNA	chr6:133658913-133691130	+	266	524	340	22	64	16	-3.30353	3.10847	1.54764e-11	2.05743e-09	similar to GTL2, imprinted maternally expressed untranslated	http://www.ncbi.nlm.nih.gov/gene/?term=500717
LOC680534	NA	chr8:39356017-39356907	-	7	12	8	0	0	2	-3.46554	-1.80644	0.000428496	0.00786732	similar to ribosomal protein L14	http://www.ncbi.nlm.nih.gov/gene/?term=680534
Dlk1	protein_coding	chr6:133576513-133583751	+	954	666	667	15	120	15	-3.69778	4.08448	3.71947e-08	2.39141e-06	delta like non-canonical Notch ligand 1	http://www.ncbi.nlm.nih.gov/gene/?term=114587
LOC683825	pseudogene	chr1:1560933-1580535	+	5	11	3	1	0	0	-3.78749	-2.16222	0.00332798	0.0414089	similar to putative pheromone receptor Go-VN13C	http://www.ncbi.nlm.nih.gov/gene/?term=683825
LOC102547451	NA	chr18:52049927-52052711	+	5	6	11	1	0	0	-3.96243	-2.03822	0.000687668	0.0115961	uncharacterized LOC102547451	http://www.ncbi.nlm.nih.gov/gene/?term=102547451
LOC103693486	NA	chr10:93163670-93183641	+	13	10	13	0	0	1	-4.66187	-1.55197	1.61323e-06	6.99106e-05	centrin-2-like	http://www.ncbi.nlm.nih.gov/gene/?term=103693486
LOC102556039	lncRNA	chr5:98390690-98420907	-	4	5	8	0	0	0	-5.49018	-2.30724	0.000826685	0.013484	uncharacterized LOC102556039	http://www.ncbi.nlm.nih.gov/gene/?term=102556039
